# Supplementary material for: Visible-light photocatalytic selective oxidation of C(sp3)–H bonds by anion–cation dual-metal-site nanoscale localized carbon nitride
Source: Royal Society of Chemistry journal article supplement (doi:10.1039/d1cy00328c), 2021-01-01

Supporting information for

# Visible-light photocatalytic selective oxidation of C(*sp*<sup>3</sup>)-H bonds by anion-cation dual-metal-site nanoscale localized carbon nitride

Yingying Wang<sup>†,a</sup>, Peihe Li<sup>†,\*a</sup>, Jinghui Wang,<sup>a</sup> Zhifei Liu,<sup>a</sup> Yin Wang,<sup>a</sup> Ye Lu,<sup>a</sup> Ying Liu,<sup>a</sup> Limei Duan,<sup>\*a</sup> Wanfei Li,<sup>b</sup> Sarina Sarina,<sup>c</sup> Huaiyong Zhu<sup>\*c</sup> and Jinghai Liu<sup>\*a</sup>

<sup>a</sup>*Inner Mongolia Key Laboratory of Carbon Nanomaterials, Nano Innovation Institute (NII), College of Chemistry and Chemical Engineering, Inner Mongolia University for Nationalities, Tongliao 028000, China.*

<sup>b</sup>*Research Center for Nanophotonic and Nanoelectronic Materials, School of Materials Science and Engineering, Suzhou University of Science and Technology, Suzhou 215009, China.*

<sup>c</sup>*School of Chemistry, Physics and Mechanical Engineering, Queensland University of Technology, Brisbane, QLD 4001, Australia*

*E-mail: phli2018@foxmail.com, duanlmxie@126.com, hy.zhu@qut.edu.au, jhliu2015@imun.edu.cn.*

| Sl. No. | Contents                                                                                                                                                                                                                                          | Pg. No. |
|---------|---------------------------------------------------------------------------------------------------------------------------------------------------------------------------------------------------------------------------------------------------|---------|
| 1       | <b>Fig. S1</b> UV-vis spectra                                                                                                                                                                                                                     | S3      |
| 2       | <b>Fig. S2</b> Band gap of g-C <sub>3</sub> N <sub>4</sub> and FePW/g-C <sub>3</sub> N <sub>4</sub>                                                                                                                                               | S4      |
| 3       | <b>Fig. S3</b> Mott-Schottky plots                                                                                                                                                                                                                | S5      |
| 4       | <b>Fig. S4</b> The <sup>31</sup> P NMR                                                                                                                                                                                                            | S6      |
| 5       | <b>Fig. S5</b> Surface chemical structures of FePW/g-C <sub>3</sub> N <sub>4</sub>                                                                                                                                                                | S7      |
| 6       | <b>Fig. S6</b> Specific surface area (SSA) and BJH pore size distributions                                                                                                                                                                        | S8      |
| 7       | <b>Fig. S7</b> TGA curve of FePW/g-C <sub>3</sub> N <sub>4</sub>                                                                                                                                                                                  | S9      |
| 8       | <b>Fig. S8</b> IR and XRD.                                                                                                                                                                                                                        | S10     |
| 9       | <b>Fig. S9</b> Surface chemical structures of recovered FePW/g-C <sub>3</sub> N <sub>4</sub>                                                                                                                                                      | S11     |
| 10      | <b>Fig. S10</b> Steady-state PL spectra, and time-resolved transient PL decay                                                                                                                                                                     | S12     |
| 11      | <b>Fig. S11</b> IR spectra of “fresh” and “recovered” FePW/g-C <sub>3</sub> N <sub>4</sub>                                                                                                                                                        | S13     |
| 12      | <b>Fig. S12</b> The spectrum of (a) simulated solar spectrum, (b) solar spectrum (c) light spectrum; (d) The picture of the reaction under the purple and blue lamp (15 W, 425 nm, 13.4mW/cm <sup>2</sup> ).                                      | S14     |
| 13      | <b>Table S1</b> ICP-OES/MS for measuring the contents                                                                                                                                                                                             | S15     |
| 14      | Optimization of reaction conditions                                                                                                                                                                                                               | S16     |
| 15      | <b>Table S2</b> Optimization of the reaction conditions                                                                                                                                                                                           | S17     |
| 16      | Control and trapping experiments                                                                                                                                                                                                                  | S18     |
| 17      | <b>Fig. S13</b> Estimation of the scaling-up effect                                                                                                                                                                                               | S23     |
| 18      | <b>Table S3</b> Control and trapping experiments of alcohol oxidation                                                                                                                                                                             | S24     |
| 19      | <b>Fig. S14</b> EPR signals of the reaction solution under alcohol oxidation conditions                                                                                                                                                           | S24     |
| 20      | <b>Fig. S15</b> Proposed mechanism of alcohol photo-oxidation over FePW/g-C <sub>3</sub> N <sub>4</sub>                                                                                                                                           | S25     |
| 21      | <b>Fig. S16</b> The photocatalytic activity for conversion and selectivity with increasing amount of Fe <sup>3+</sup> (a) and decreasing amount of PW <sub>12</sub> O <sub>40</sub> <sup>3-</sup> (b) for FePW/ g-C <sub>3</sub> N <sub>4</sub> . | S25     |
| 22      | Spectroscopic data of products                                                                                                                                                                                                                    | S26     |
| 23      | NMR Spectra                                                                                                                                                                                                                                       | S39     |

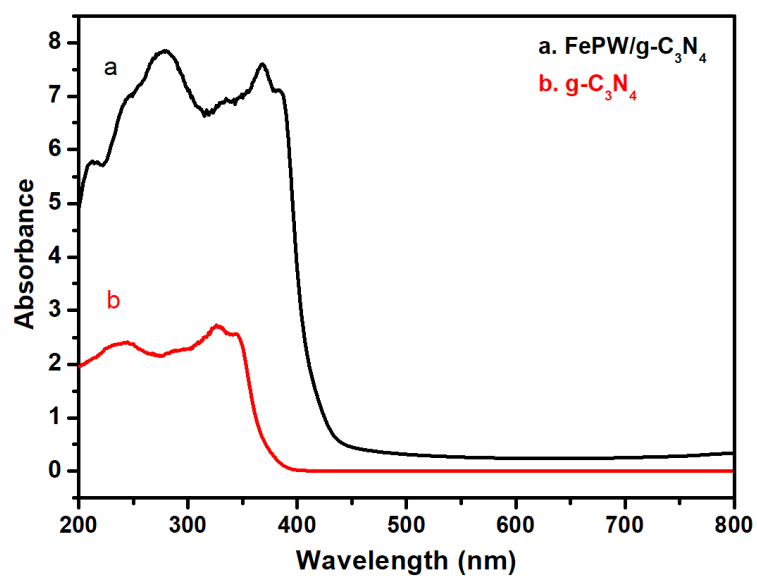

**Fig. S1** UV-vis spectra of the (a) g-C<sub>3</sub>N<sub>4</sub>, and (b) FePW/g-C<sub>3</sub>N<sub>4</sub>

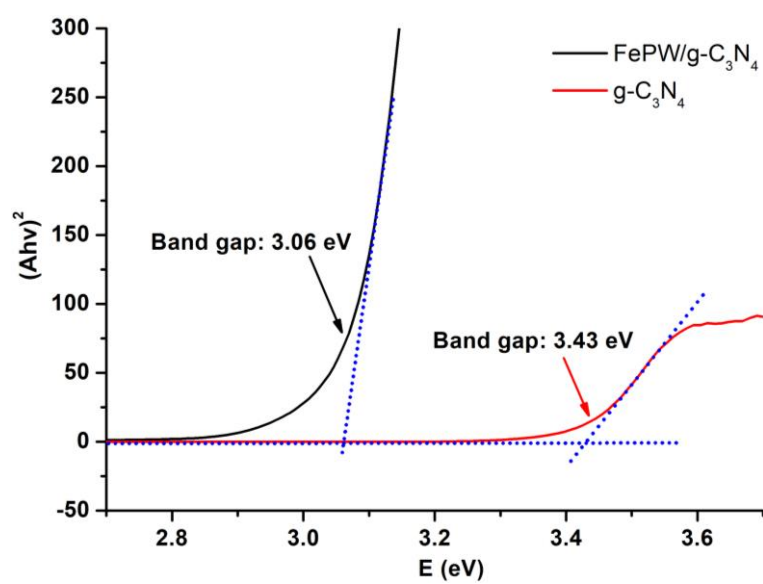

**Fig. S2** Band gap of g-C<sub>3</sub>N<sub>4</sub> and FePW/g-C<sub>3</sub>N<sub>4</sub> obtained from the UV/Vis DR spectrum according to the Kubelka–Munk theory.

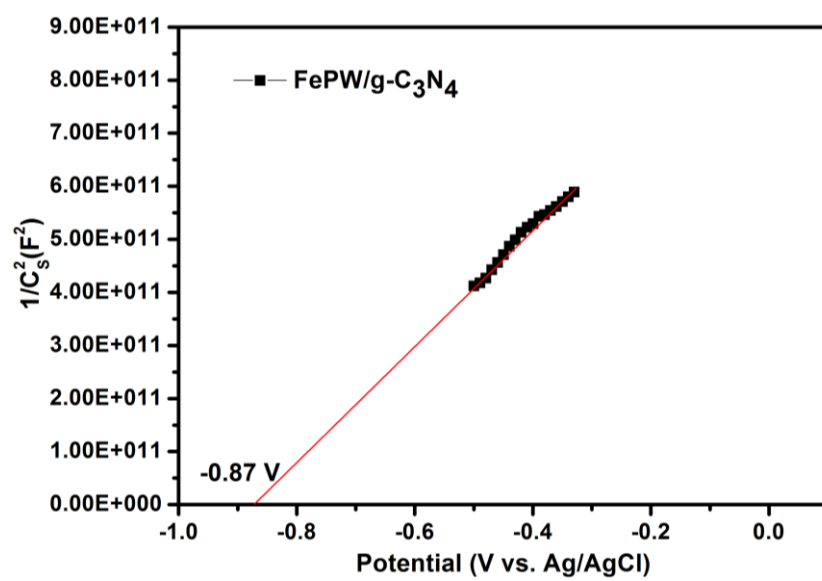

**Fig. S3** Mott-Schottky plots.

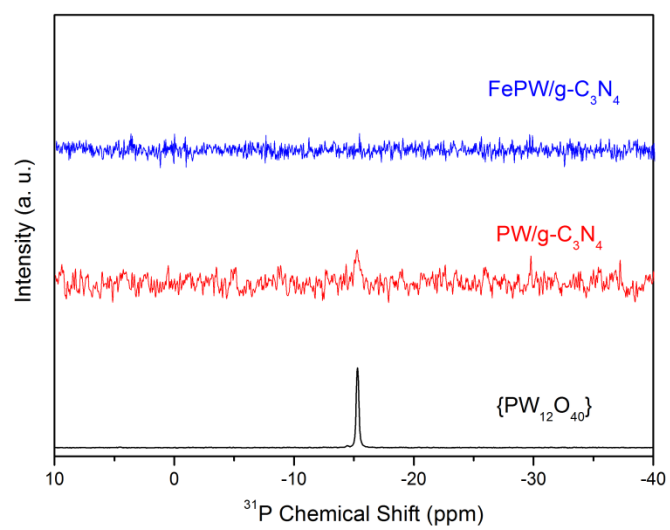

**Fig. S4** The  $^{31}\text{P}$  NMR of {PW<sub>12</sub>O<sub>40</sub>}, PW/g-C<sub>3</sub>N<sub>4</sub> and FePW/g-C<sub>3</sub>N<sub>4</sub>.

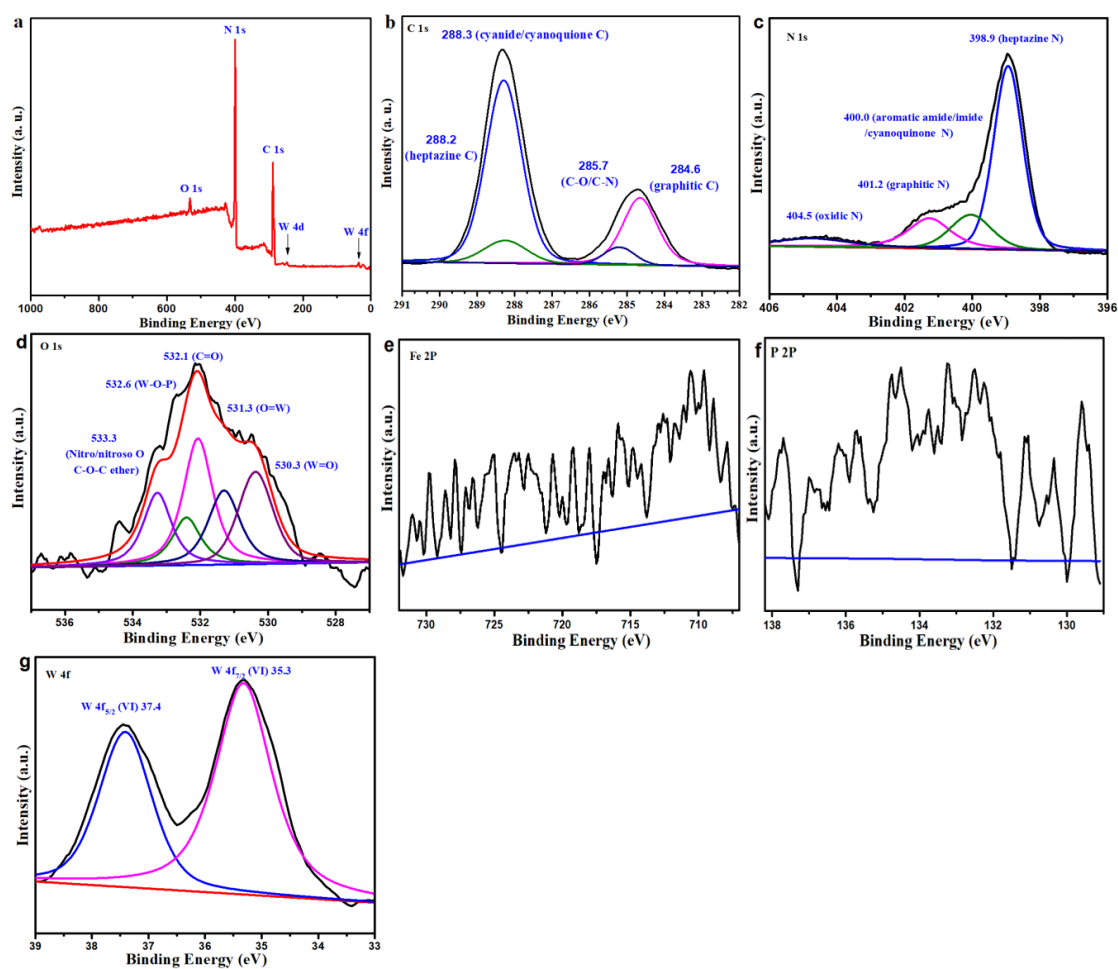

**Fig. S5** Surface chemical structures of FePW/g-C<sub>3</sub>N<sub>4</sub>. (a) XPS survey for FePW/g-C<sub>3</sub>N<sub>4</sub>. (b) High-resolution C1s spectrum. (c) N1s spectrum. (d) O1s spectrum. (e) Fe2p spectrum. (f) P2p spectrum. (g) High-resolution W4f spectrum.

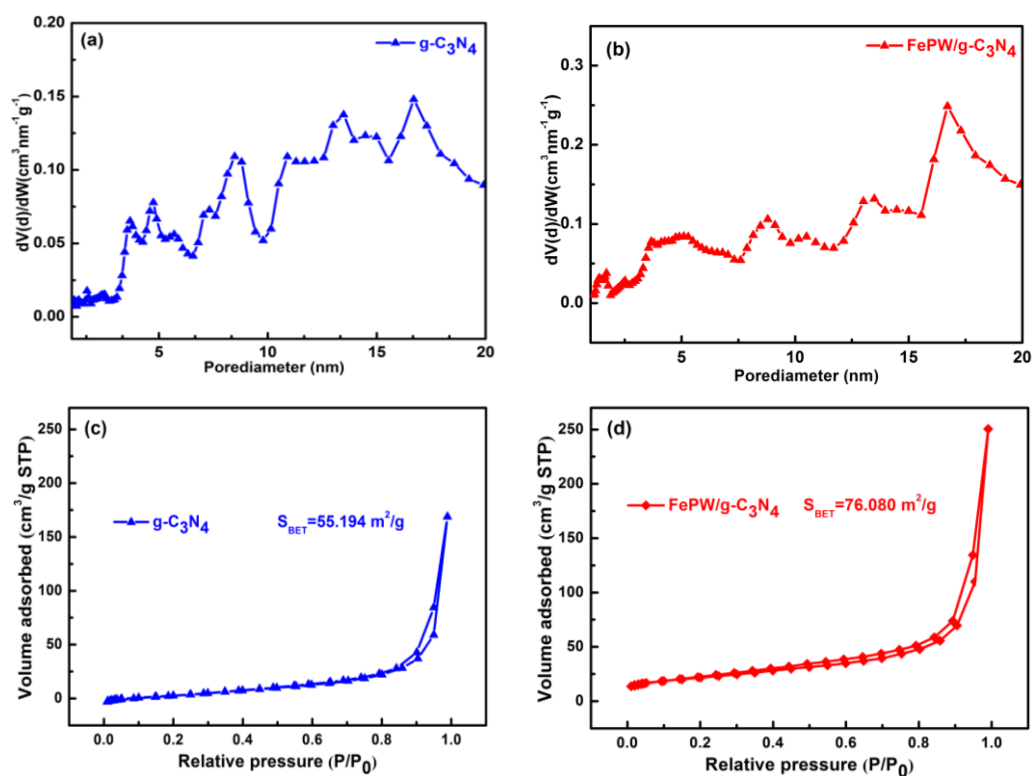

**Fig. S6** Specific surface area (SSA) and BJH pore size distributions for g-C<sub>3</sub>N<sub>4</sub> and FePW/g-C<sub>3</sub>N<sub>4</sub> control. (a) and (b) pore size distribution and pore volume analyzed according to Barret-Joyner-Halenda (BJH) method for g-C<sub>3</sub>N<sub>4</sub> and FePW/g-C<sub>3</sub>N<sub>4</sub>. N<sub>2</sub> adsorption/desorption isotherms: (c) the SSA of g-C<sub>3</sub>N<sub>4</sub> is 55.194 m<sup>2</sup>/g, and the SSA of FePW/g-C<sub>3</sub>N<sub>4</sub> is 76.080 m<sup>2</sup>/g.



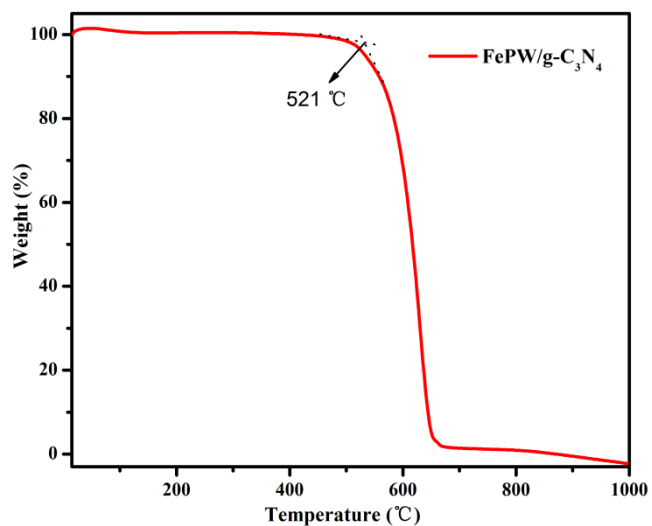

**Fig. S7** TGA curve of FePW/g-C<sub>3</sub>N<sub>4</sub> obtained under nitrogen atmosphere at a heating rate of 10 °C/min. The FePW/g-C<sub>3</sub>N<sub>4</sub> exhibited excellent thermal stability up to 521 °C and start to loss for the bulk material.

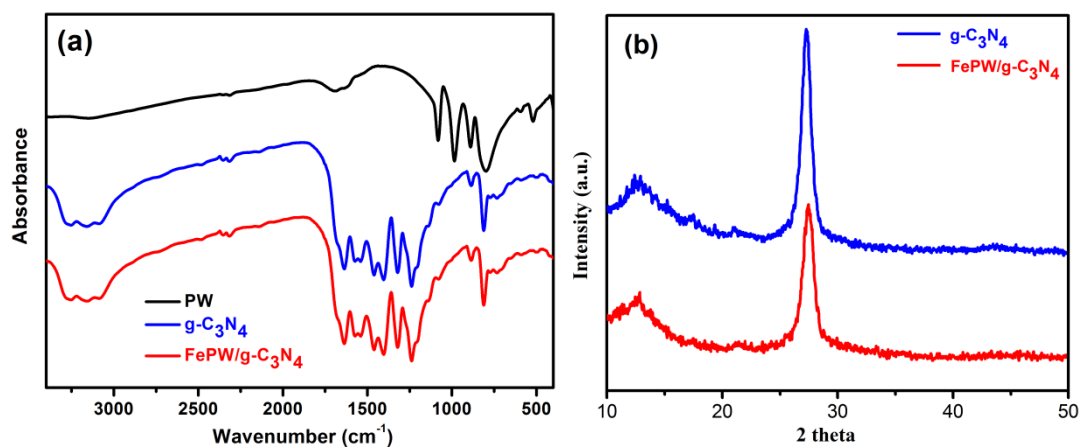

**Fig. S8** (a) IR spectra of the  $\{\text{PW}_{12}\text{O}_{40}\} = \{\text{PW}\}$ ,  $\text{g-C}_3\text{N}_4$  and  $\text{FePW/g-C}_3\text{N}_4$ ; (b) XRD patterns of the as-synthesized sample:  $\text{g-C}_3\text{N}_4$  and  $\text{FePW/g-C}_3\text{N}_4$ .

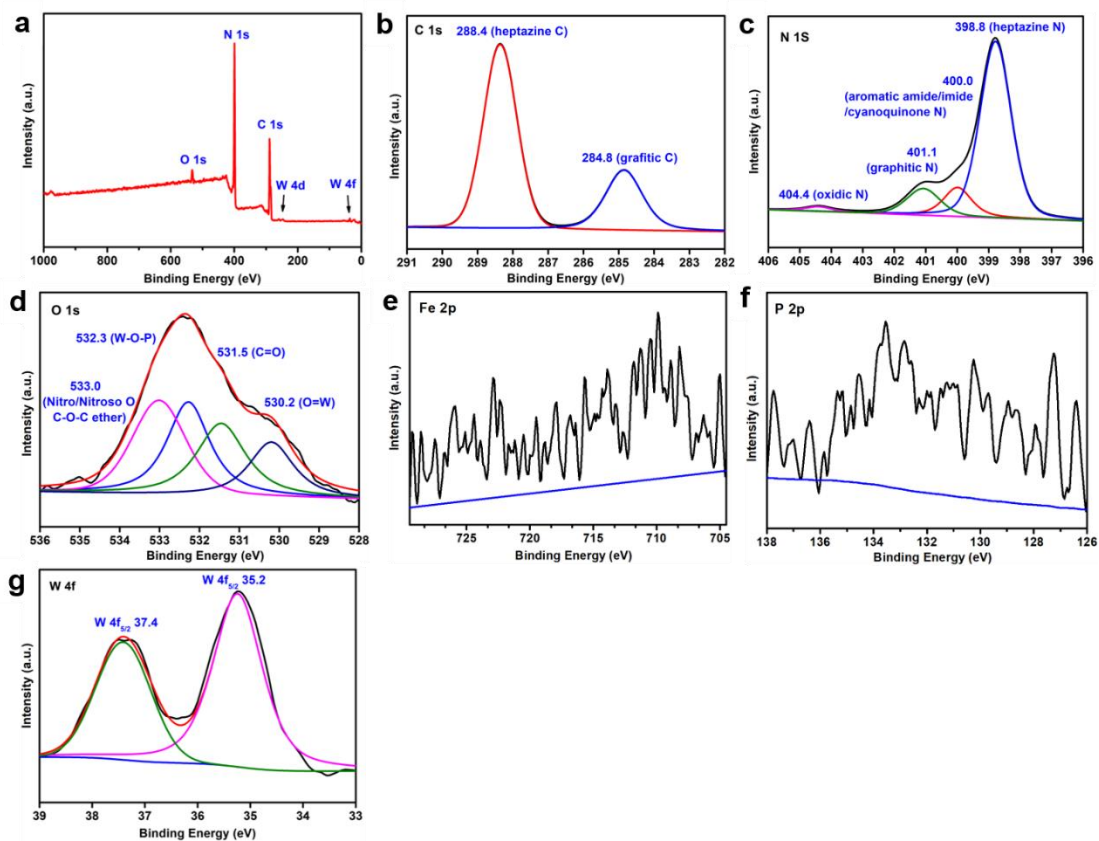

**Fig. S9** Surface chemical structures of recovered FePW/g-C<sub>3</sub>N<sub>4</sub>. (a) XPS survey for FePW/g-C<sub>3</sub>N<sub>4</sub>. (b) High-resolution C1s spectrum. (c) N1s spectrum. (d) O1s spectrum. (e) Fe2p spectrum. (f) P2p spectrum. (g) High-resolution W4f spectrum.

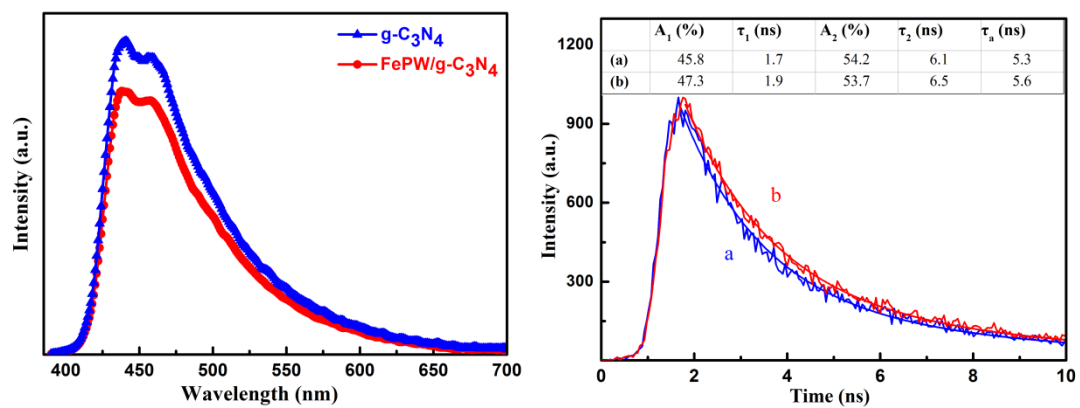

**Fig. S10** Steady-state PL spectra, and time-resolved transient PL decay of (a) g-C<sub>3</sub>N<sub>4</sub> and (b) FePW/g-C<sub>3</sub>N<sub>4</sub>.

### Stability of the catalyst (FePW/g-C<sub>3</sub>N<sub>4</sub>)

After six cycles of the catalyst, we have obtained the catalyst from the simple centrifugation. The catalyst was washed with ethyl acetate, dichloromethane and ethanol, dried in air. The Fourier transform infrared (FT-IR) spectra of (a) “fresh” FePW/g-C<sub>3</sub>N<sub>4</sub>, and (b) “recovered” FePW/g-C<sub>3</sub>N<sub>4</sub> showed that the {g-C<sub>3</sub>N<sub>4</sub>} was stable in this reaction system by the characteristic peaks appeared at 1636, 1570, 1468, 1402, 1318, 1241, 812 cm<sup>-1</sup>.

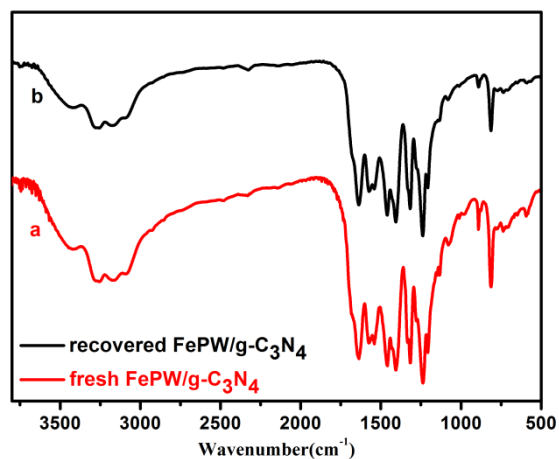

**Fig. S11** IR spectra of (a) “fresh” FePW/g-C<sub>3</sub>N<sub>4</sub> and (c) “recovered” FePW/g-C<sub>3</sub>N<sub>4</sub>.

## The resources of light

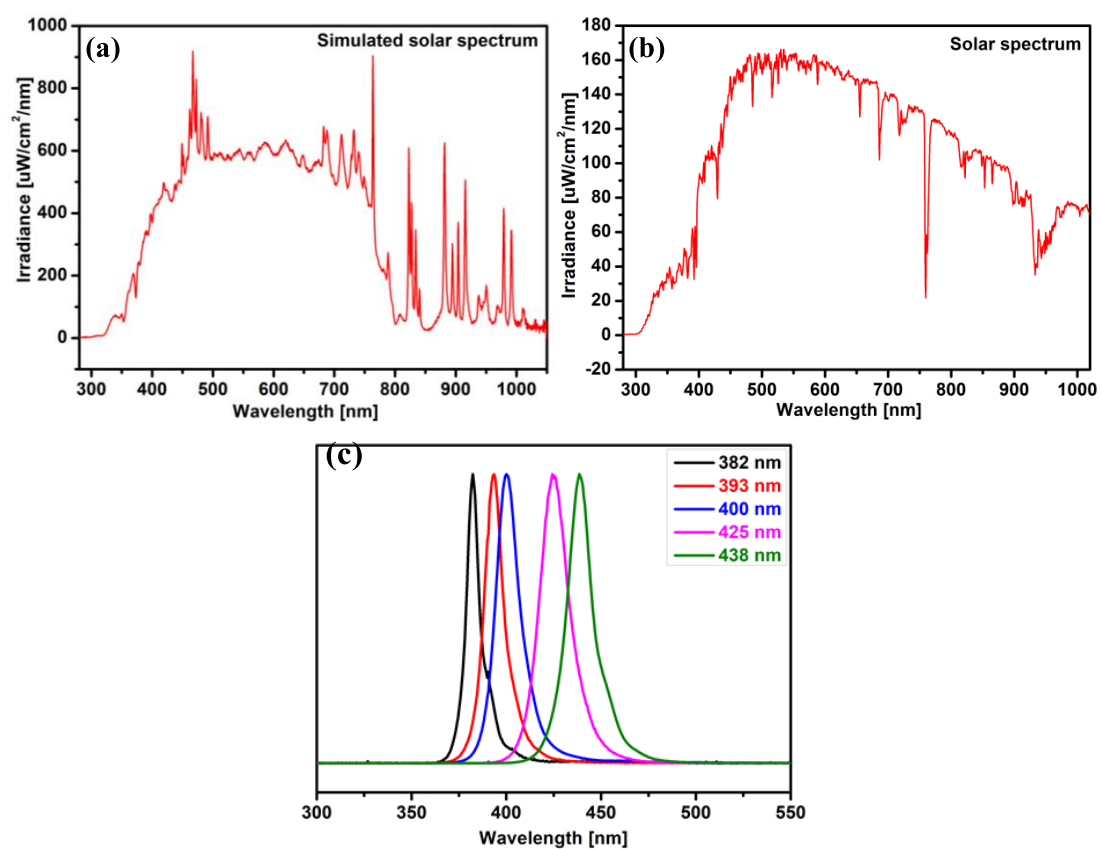

(d)

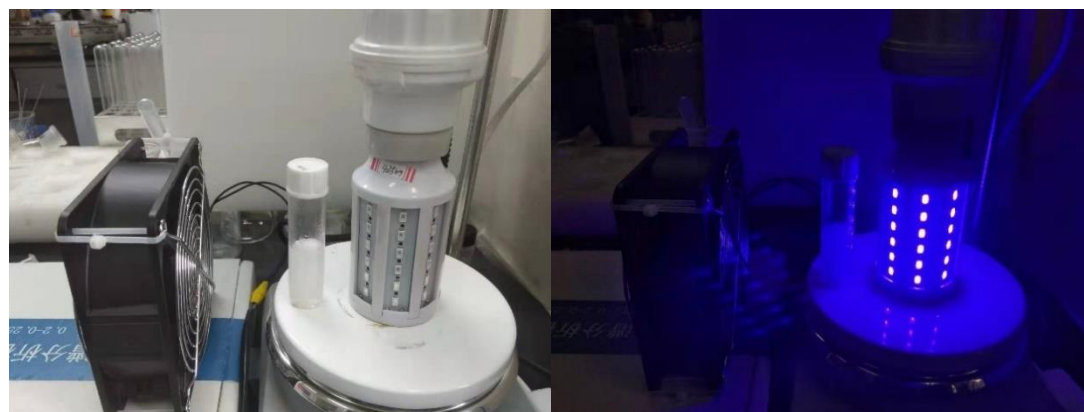

**Fig. S12** The spectrum of (a) simulated solar spectrum, (b) solar spectrum, (c) light spectrum; (d) The picture of the reaction under the purple lamp (15 W, 425 nm,  $13.4\text{mW}/\text{cm}^2$ ).

**Table S1** ICP-OES/MS for measuring the contents of Fe and P in FePW/g-C<sub>3</sub>N<sub>4</sub>.  
**A:** FePW/g-C<sub>3</sub>N<sub>4</sub>; **B:** PW/g-C<sub>3</sub>N<sub>4</sub>; **C:** Fe/g-C<sub>3</sub>N<sub>4</sub>; **D:** recovered FePW/g-C<sub>3</sub>N<sub>4</sub>.

| Entry    | Elements  | Concentration in solids | Atomic ratio         |
|----------|-----------|-------------------------|----------------------|
| <b>A</b> | <b>Fe</b> | 0.68 wt%                |                      |
| <b>A</b> | <b>P</b>  | 0.0098 wt%              | Fe/P/W = 158.7/4.1/1 |
| <b>A</b> | <b>W</b>  | 0.014 wt%               |                      |
| <b>B</b> | <b>P</b>  | 0.076 wt%               | P/W = 1/10.9         |
| <b>B</b> | <b>W</b>  | 4.88 wt%                |                      |
| <b>C</b> | <b>Fe</b> | 1.8 wt%                 |                      |
| <b>D</b> | <b>Fe</b> | 0.65 wt%                |                      |
| <b>D</b> | <b>P</b>  | 0.0098 wt%              | Fe/P/W = 141.6/3.8/1 |
| <b>D</b> | <b>W</b>  | 0.015 wt%               |                      |

**Optimization of reaction conditions:** cyclohexane **1a** as the model substrate for the oxidation reaction. A 10 mL quartz vial was charged with cyclohexane **1a** (0.2 mmol), *tert*-butyl hydroperoxide (2.5 mmol, 2.5 equiv, 65 mg), FePW/g-C<sub>3</sub>N<sub>4</sub> (2 mg), and MeCN (2.0 mL). The reaction was monitored by GC analysis using biphenyl as internal standard.

**Cyclohexane (1a) standard curve equation:**

$$y = 1.0608x - 0.0231 \quad (R^2 = 0.9983)$$

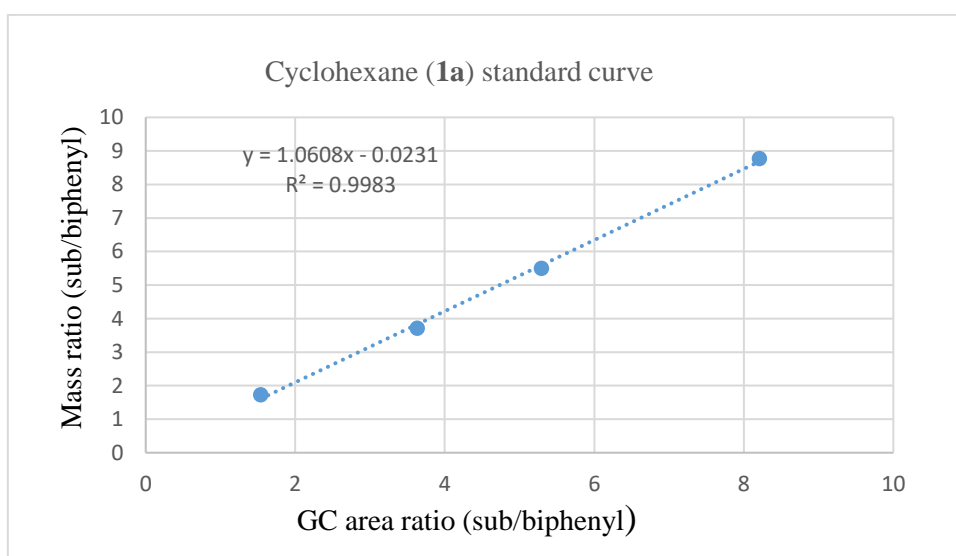

**Cyclohexanone (2a) standard curve equation:**

$$y = 1.2232x + 1.3982 \quad (R^2 = 0.998)$$

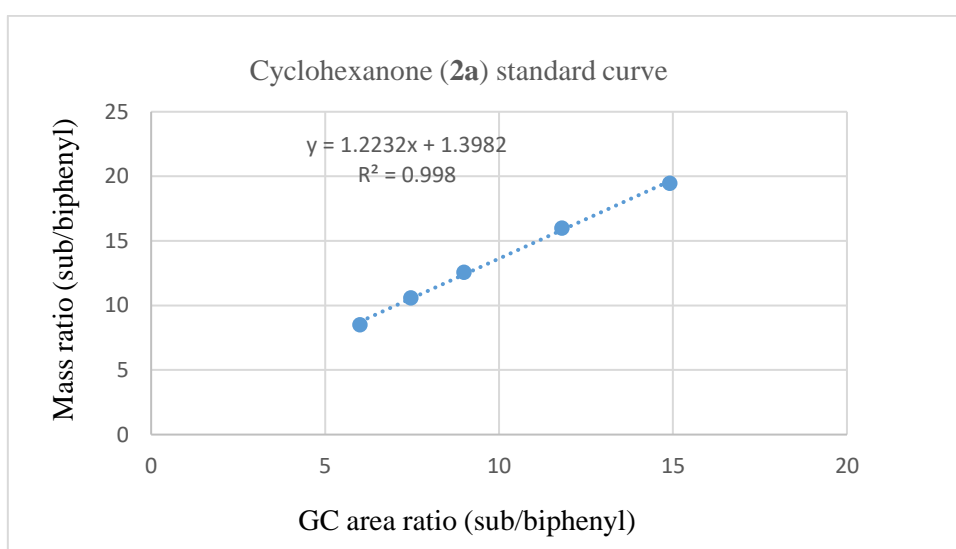



**Table S2** Optimization of the reaction conditions.<sup>a</sup>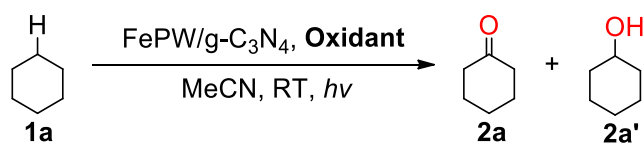

| Entry            | Oxidant                             | Con. (%) <sup>b</sup> | Sel. (%) <sup>b</sup> |            |
|------------------|-------------------------------------|-----------------------|-----------------------|------------|
|                  |                                     |                       | <b>2a</b>             | <b>2a'</b> |
| 1                | O <sub>2</sub> (Air)                | 0                     | 0                     | 0          |
| 2                | O <sub>2</sub> (1 atm)              | 8                     | 56                    | 44         |
| 3                | H <sub>2</sub> O <sub>2</sub> (30%) | 36                    | 67                    | 33         |
| 4                | TBHP (70%)                          | 86                    | 99                    | 1          |
| 5 <sup>[c]</sup> | TBHP (70%)                          | 71                    | 99                    | 1          |
| 6 <sup>[d]</sup> | TBHP (70%)                          | 87                    | 99                    | 1          |
| 7 <sup>[e]</sup> | TBHP (70%)                          | 86                    | 99                    | 1          |

<sup>a</sup>Reaction conditions: **1a** (0.2 mmol), Catalyst (2 mg), Oxidant (2.5 equiv.), in a solution of MeCN (2.0 mL) under the irradiation of light sunlight at room temperature for 40 h.

<sup>b</sup>Corrected gas chromatography yield using biphenyl as an internal standard. <sup>c</sup>TBHP = <sup>t</sup>BuOOH (2.0 equiv.). <sup>d</sup>TBHP (3.0 equiv.). <sup>e</sup>TBHP (3.5 equiv.).

### Control and trapping experiments

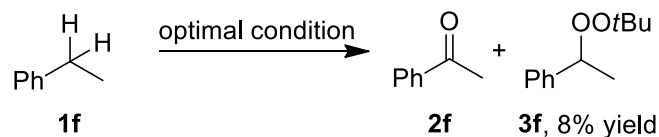

**(Fig. 1h, (1))** A 20 mL quartz vial was charged with ethylbenzene **1f** (1 mmol), *tert*-butyl hydroperoxide (2.5 mmol, 2.5 equiv, 321 mg), FePW/g-C<sub>3</sub>N<sub>4</sub> (10 mg), and MeCN (10.0 mL). The vial was sealed with a polytetrafluoroethylene-lined cap, then the reaction was stirred under light irradiation with a 12-Inch fan at ambient temperature (25-35 °C). After 5 h of the reaction, the reaction was quenched with a saturated NH<sub>4</sub>Cl solution. Then the catalyst was filtered and washed with ethyl acetate, and the reaction was diluted with H<sub>2</sub>O and ethyl acetate, the organic layer washed with H<sub>2</sub>O, brine, dried over MgSO<sub>4</sub> and purified by silica gel chromatography using a mixture of hexanes and EtOAc (hexane:EtOAc = 20:1) to provide **2f** (Oil, 62 mg, 52% ) and the radical adduct **3f**. (1-(*tert*-butylperoxy)ethyl)benzene **3f**: (Oil, 16 mg, 8% yield), R<sub>f</sub> = 0.65 (hexane:EtOAc = 20:1); <sup>1</sup>H NMR (500 MHz, CDCl<sub>3</sub>) δ 7.37–7.25 (m, 5H), 4.99 (q, *J* = 6.6 Hz, 1H), 1.48 (d, *J* = 6.6 Hz, 3H), 1.22 (s, 9H); <sup>13</sup>C NMR (126 MHz, CDCl<sub>3</sub>) δ 142.2, 128.2, 127.7, 126.7, 81.6, 80.1, 26.5, 20.4.

<sup>1</sup>H NMR and <sup>13</sup>C NMR Spectrum of **3f**

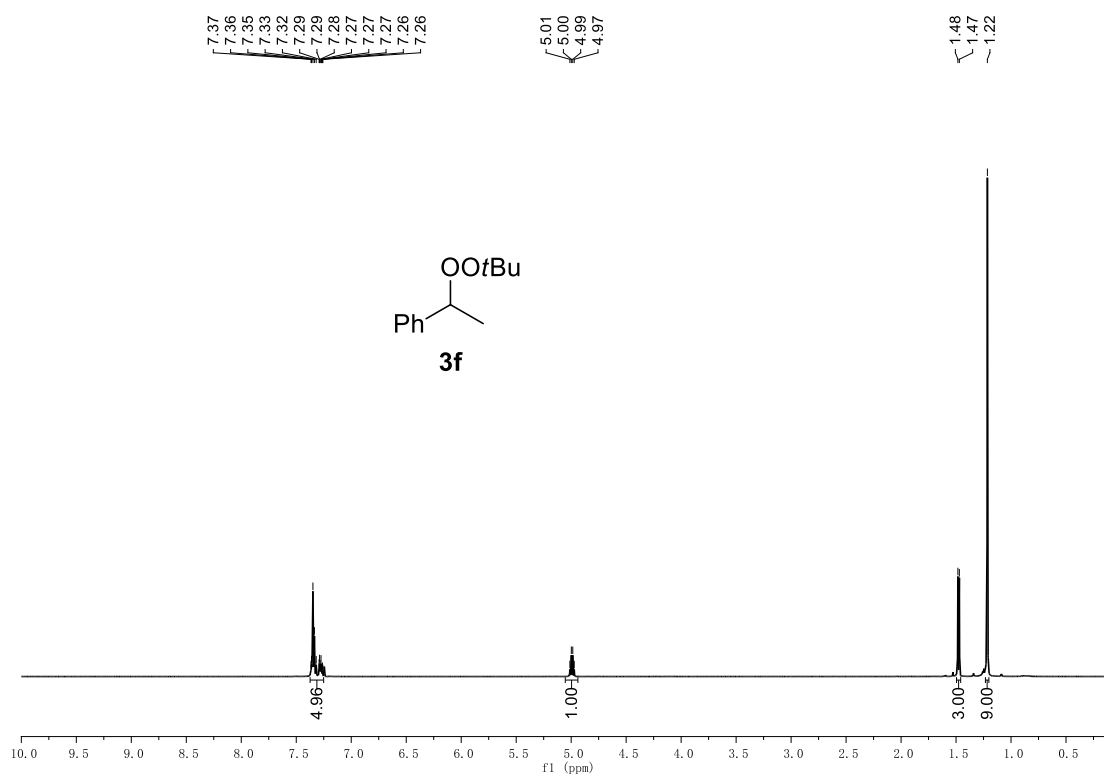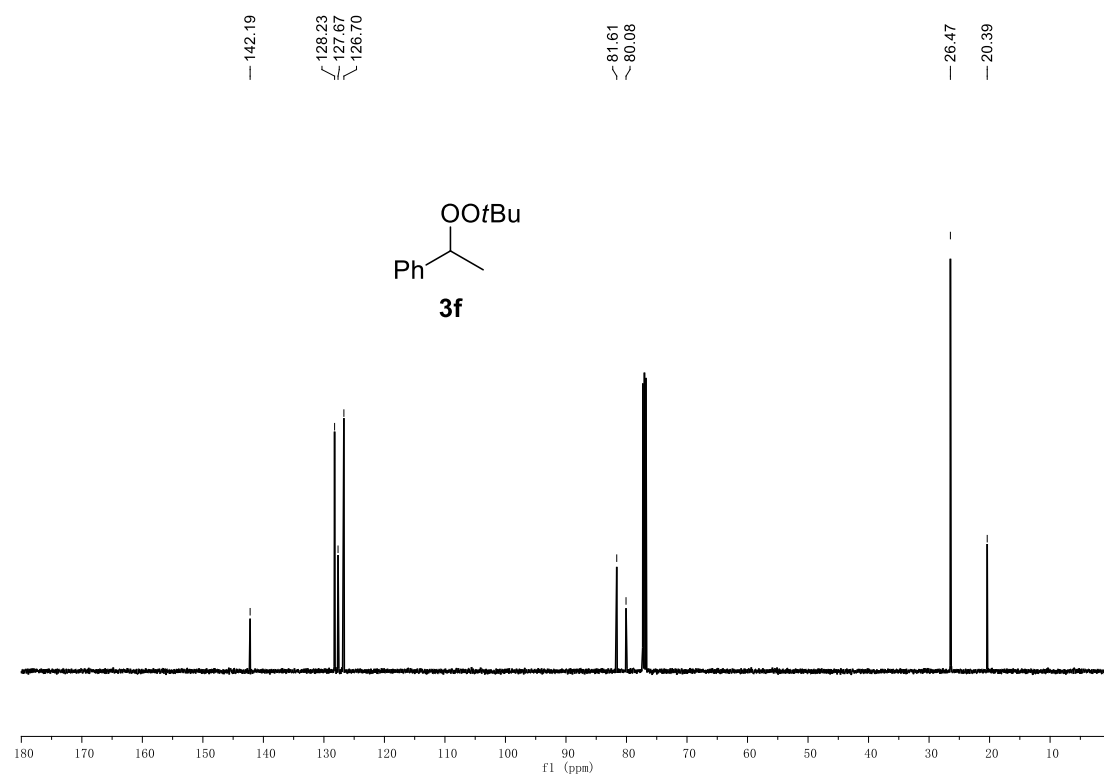

### Control and trapping experiments

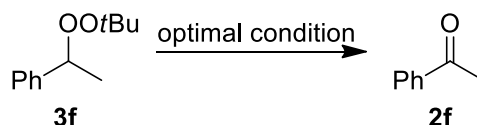

A 10 mL quartz vial was charged with **3f** (0.2 mmol, 39 mg), *tert*-butyl hydroperoxide (2.5 mmol, 2.5 equiv, 64 mg), FePW/g-C<sub>3</sub>N<sub>4</sub> (2 mg), and MeCN (2.0 mL). The vial was sealed with a polytetrafluoroethylene-lined cap, then the reaction was stirred under light irradiation ( $\lambda = 425$  nm) with a 12-Inch fan at ambient temperature (25-35 °C). After 15 h of the reaction, the reaction was quenched with a saturated NH<sub>4</sub>Cl solution. Then the catalyst was filtered and washed with ethyl acetate, and the reaction was diluted with H<sub>2</sub>O and ethyl acetate, the organic layer washed with H<sub>2</sub>O, brine, dried over MgSO<sub>4</sub> and purified by silica gel chromatography using a mixture of hexanes and EtOAc (hexane:EtOAc = 20:1) to provide **2f** (Oil, 22 mg, 92% )

## Control and trapping experiments

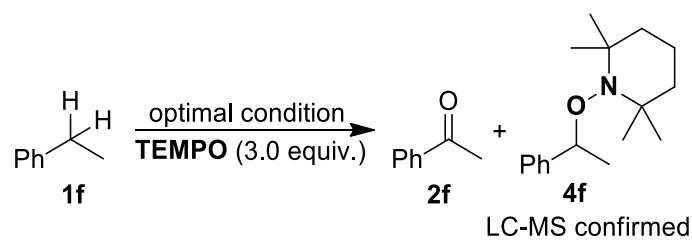

(**Fig. 1h, (2)**) A 20 mL quartz vial was charged with ethylbenzene **1f** (1 mmol), *tert*-butyl hydroperoxide (2.5 mmol, 2.5 equiv, 321 mg), FePW/g-C<sub>3</sub>N<sub>4</sub> (10 mg), 2,2,6,6-tetramethylpiperidine-1-oxyl (TEMPO, 3.0 equiv.) and MeCN (10.0 mL). The vial was sealed with a polytetrafluoroethylene-lined cap, then the reaction was stirred under light irradiation ( $\lambda = 425$  nm) with a 12-Inch fan at ambient temperature (25-35 °C). After 15 h of the reaction, the reaction was quenched with a saturated NH<sub>4</sub>Cl solution. Then the catalyst was filtered and washed with ethyl acetate, and the reaction was diluted with H<sub>2</sub>O and ethyl acetate, the organic layer washed with H<sub>2</sub>O, brine, dried over MgSO<sub>4</sub>, **4f** was detected by LC-MS. LC-MS (ESI)  $m/z$ : Calcd for C<sub>17</sub>H<sub>27</sub>NO [M+H]<sup>+</sup> 262.2165; found 262.2282.

LC-MS of the reaction (Fig. 2, (3))

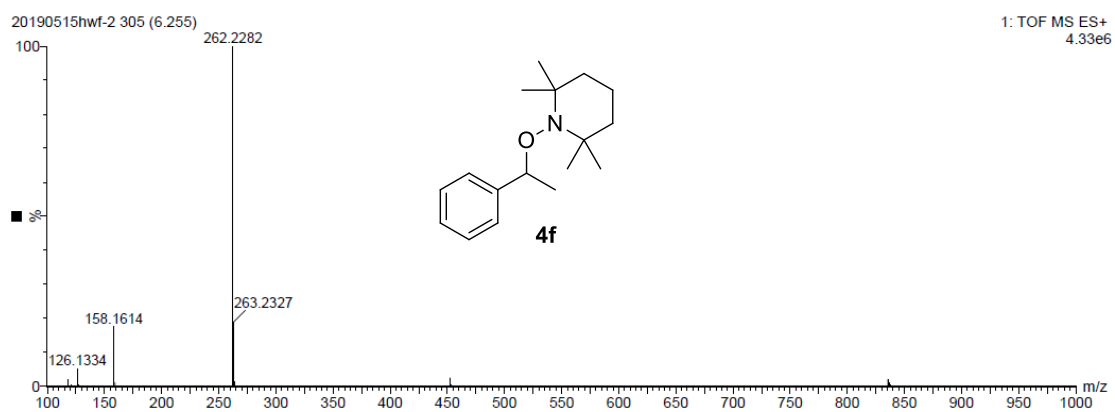

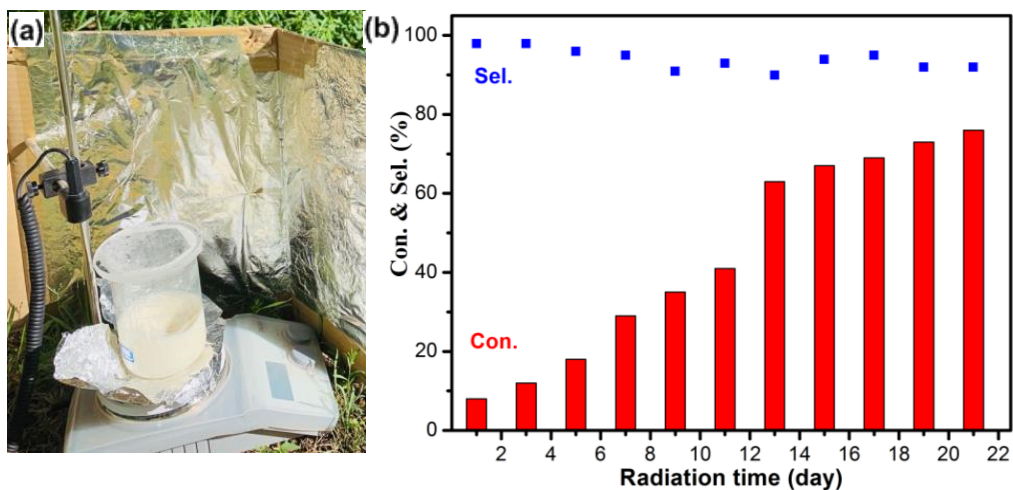

**Fig. S13 Estimation of the scale-up effect (300 mL):** A 500 mL quartz glass beaker was charged with ethylbenzene **1f** (10 g, 94 mmol), *tert*-butyl hydroperoxide (2.0 equiv, 24 g), FePW/g-C<sub>3</sub>N<sub>4</sub> (500 mg), and MeCN (300 mL). The beaker with a quartz lid, then the reaction was stirred under sunlight irradiation. The reaction was performed under natural sunlight in Tongliao (5/6/2019-27/6/2019, 25-35 °C, only the put the reaction outside on sunny days, otherwise leave it in dark) (9:00 Am-15:00 Pm with 6 hours per day). The averaged solar energy input was ~180 mW as the effective irradiation area was 160 cm<sup>2</sup> and the averaged unit solar power was ~1.125 mW/cm<sup>2</sup>.

**Table S3** Control and trapping experiments of alcohol oxidation.<sup>a</sup>

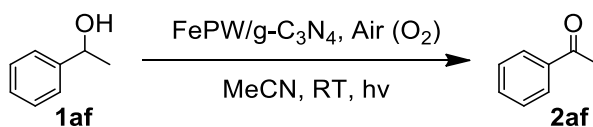

| Entry          | Variation                             | Yield (%) |
|----------------|---------------------------------------|-----------|
| 1              | In darkness                           | <5        |
| 2              | Benzoquinone (1 equiv.)               | 20        |
| 3              | AgNO <sub>3</sub> (1 equiv.)          | 16        |
| 4              | <i>Tert</i> -butyl alcohol (1 equiv.) | 96        |
| 5              | Ammonium oxalate (1 equiv.)           | 68        |
| 6              | NaN <sub>3</sub> (1 equiv.)           | 58        |
| 7 <sup>b</sup> | Catalase (20 mg)                      | 95        |

<sup>a</sup>Reaction conditions: FePW/g-C<sub>3</sub>N<sub>4</sub> (2 mg), MeCN (2 mL), under the light irradiation ( $\lambda = 425$  nm). <sup>b</sup>Catalase (3500 units/mg).

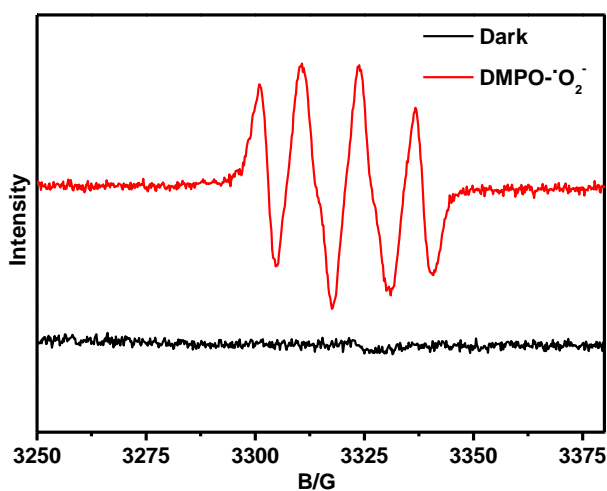

**Fig. S14** EPR signals of the reaction solution in the dark (black line) and 425 nm LED light illumination (red line) in the presence of 5,5-dimethyl-1-pyrroline N-oxide (DMPO) as spin-trapping reagents under alcohol oxidation conditions.



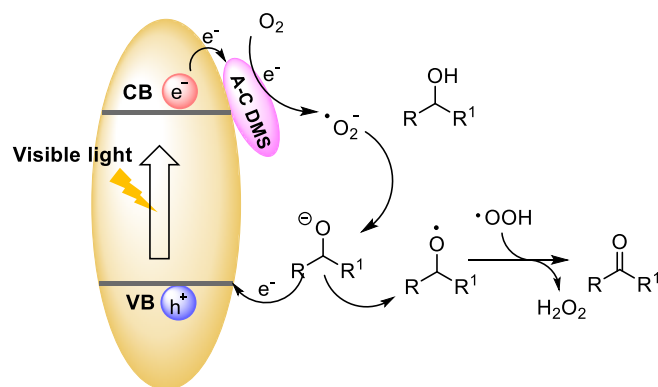

Anion-Cation Dual-Metal-Site (A-C DMS, A =  $\{PW_{12}\}^{3-}$ , C =  $Fe^{3+}$  or  $Ni^{2+}$ )

**Fig. S15** Proposed mechanism of alcohol photo-oxidation.

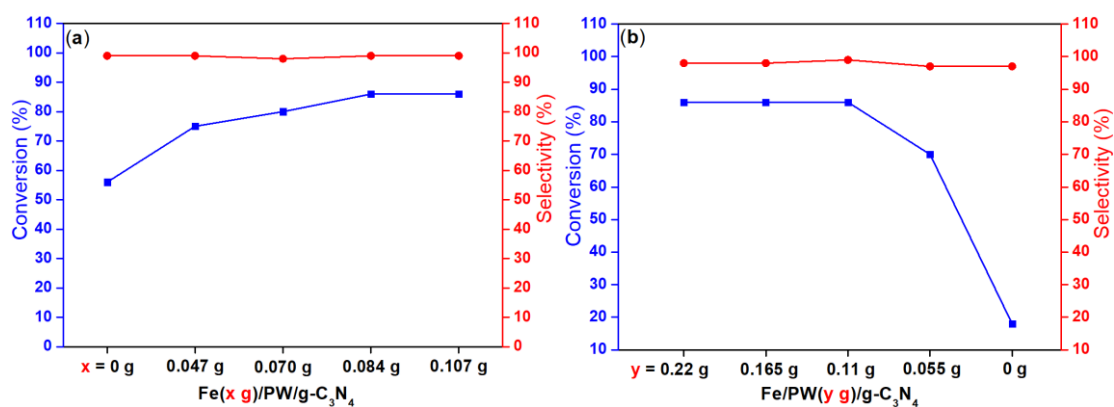

**Fig. S16** The photocatalytic activity for conversion and selectivity with increasing amount of  $Fe^{3+}$  (a) and decreasing amount of  $PW_{12}O_{40}^{3-}$  (b) for FePW/ g-C<sub>3</sub>N<sub>4</sub>.

## Spectroscopic data of products

Table 2, entry 6

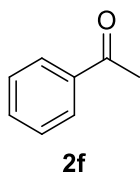

**Acetophenone (2f).** Oil (119 mg, 99% yield);  $R_f = 0.48$  (hexane:EtOAc = 20:1);  $^1\text{H}$  NMR (500 MHz,  $\text{CDCl}_3$ )  $\delta$  7.97 (d,  $J = 7.2$  Hz, 2H), 7.58 (t,  $J = 7.4$  Hz, 1H), 7.48 (t,  $J = 7.7$  Hz, 2H), 2.62 (s, 3H);  $^{13}\text{C}$  NMR (125 MHz,  $\text{CDCl}_3$ )  $\delta$  198.3, 137.3, 133.2, 128.7, 128.4, 26.7.

- (1) S. Li, B. Zhu, R. Lee, B. Qiao, Visible light-induced selective aerobic oxidative transposition of vinyl halides using a tetrahalogenoferrate(III) complex catalyst, *Org. Chem. Front.* 5 (2018) 380–385.

Table 2, entry 7

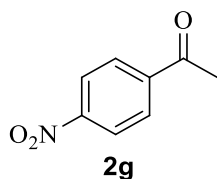

**1-(4-nitrophenyl)ethanone (2g).** White solid (163 mg, 98% yield); mp: 77–78 °C;  $R_f = 0.40$  (hexane:EtOAc = 15:1);  $^1\text{H}$  NMR (500 MHz,  $\text{CDCl}_3$ )  $\delta$  8.29 (d,  $J = 8.7$  Hz, 2H), 8.11 (d,  $J = 8.7$  Hz, 2H), 2.68 (s, 3H);  $^{13}\text{C}$  NMR (125 MHz,  $\text{CDCl}_3$ )  $\delta$  196.2, 150.2, 141.2, 129.1, 123.7, 26.8.

- (1) J. Zhang, Z. Wang, Y. Wang, C. Wan, X. Zheng, Z. Wang, A metal-free catalytic system for the oxidation of benzylic methylenes and primary amines under solvent-free conditions, *Green Chem.* 11 (2009) 1973–1978.

Table 2, entry 8

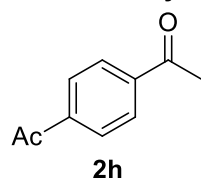

**1,1'-(1,4-phenylene)diethanone (2h).** White solid (128 mg, 79% yield); mp: 114–115 °C;  $R_f = 0.30$  (hexane:EtOAc = 10:1);  $^1\text{H}$  NMR (500 MHz,  $\text{CDCl}_3$ )  $\delta$  8.0–7.99 (m, 4H), 2.61 (s, 6H);  $^{13}\text{C}$  NMR (125 MHz,  $\text{CDCl}_3$ )  $\delta$  197.4, 140.1, 128.4, 26.8.

- (1) J. Liu, K.-F. Hu, J.-P. Qu, Y.-B. Kang, Organopromoted Selectivity-Switchable Synthesis of Polyketones, *Org. Lett.*, 19 (2017), 5593–5596.

**Table 2, entry 9**

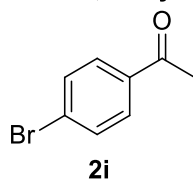

**1-(4-bromophenyl)ethanone (2i).** White solid (185 mg, 93% yield); mp: 49-50 °C;  $R_f = 0.4$  (hexane:EtOAc = 20:1);  $^1\text{H NMR}$  (500 MHz,  $\text{CDCl}_3$ )  $\delta$  7.80 (d,  $J = 8.5$  Hz, 2H), 7.59 (d,  $J = 8.5$  Hz, 2H), 2.57 (s, 3H);  $^{13}\text{C NMR}$  (125 MHz,  $\text{CDCl}_3$ )  $\delta$  197.1, 135.9, 131.9, 129.9, 128.4, 26.6.

- (1) S. Li, B. Zhu, R. Lee, B. Qiao, Visible light-induced selective aerobic oxidative transposition of vinyl halides using a tetrahalogenoferrate(III) complex catalyst, *Org. Chem. Front.* 5 (2018) 380–385.

**Table 2, entry 10**

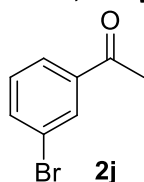

**1-(3-bromophenyl)ethanone (2j).** Oil (159 mg, 80% yield);  $R_f = 0.47$  (hexane:EtOAc = 20:1);  $^1\text{H NMR}$  (500 MHz,  $\text{CDCl}_3$ )  $\delta$  8.06 (s, 1H), 7.85 (d,  $J = 7.7$  Hz, 1H), 7.66 (d,  $J = 7.9$  Hz, 1H), 7.33 (t,  $J = 7.8$  Hz, 1H), 2.58 (s, 3H);  $^{13}\text{C NMR}$  (125 MHz,  $\text{CDCl}_3$ )  $\delta$  196.7, 138.8, 136.0, 131.4, 130.3, 126.9, 123.0, 26.7.

- (1) S. Li, B. Zhu, R. Lee, B. Qiao, Visible light-induced selective aerobic oxidative transposition of vinyl halides using a tetrahalogenoferrate(III) complex catalyst, *Org. Chem. Front.* 5 (2018) 380–385.

**Table 2, entry 11**

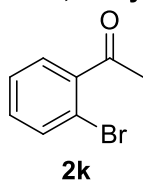

**1-(2-bromophenyl)ethanone (2k).** Oil (149 mg, 75% yield);  $R_f = 0.5$  (hexane:EtOAc = 20:1);  $^1\text{H NMR}$  (500 MHz,  $\text{CDCl}_3$ )  $\delta$  7.59 (d,  $J = 7.9$  Hz, 1H), 7.44 (d,  $J = 9.3$  Hz,

1H), 7.35 (t,  $J = 7.5$  Hz, 1H), 7.26 (t,  $J = 6.8$  Hz, 1H), 2.61 (s, 3H);  $^{13}\text{C}$  NMR (125 MHz,  $\text{CDCl}_3$ )  $\delta$  201.3, 141.4, 133.8, 131.7, 128.8, 127.4, 118.8, 30.3.

(1) S. Li, B. Zhu, R. Lee, B. Qiao, Visible light-induced selective aerobic oxidative transposition of vinyl halides using a tetrahalogenoferrate(III) complex catalyst, *Org. Chem. Front.* 5 (2018) 380–385.

**Table 2, entry 12**

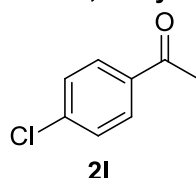

**1-(4-chlorophenyl)ethanone (2l).** Oil (140 mg, 91% yield);  $R_f = 0.49$  (hexane:EtOAc = 20:1);  $^1\text{H}$  NMR (500 MHz,  $\text{CDCl}_3$ )  $\delta$  7.90 (d,  $J = 8.6$  Hz, 2H), 7.44 (d,  $J = 8.6$  Hz, 2H), 2.59 (s, 3H);  $^{13}\text{C}$  NMR (125MHz,  $\text{CDCl}_3$ )  $\delta$  196.8, 139.5, 135.4, 129.7, 128.9, 26.5.

(1) S. Li, B. Zhu, R. Lee, B. Qiao, Visible light-induced selective aerobic oxidative transposition of vinyl halides using a tetrahalogenoferrate(III) complex catalyst, *Org. Chem. Front.* 5 (2018) 380–385.

**Table 2, entry 13**

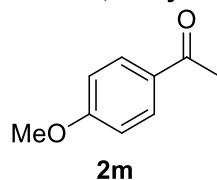

**1-(4-methoxyphenyl)ethanone (2m).** Oil (126 mg, 85% yield);  $R_f = 0.30$  (hexane:EtOAc = 20:1);  $^1\text{H}$  NMR (500 MHz,  $\text{CDCl}_3$ )  $\delta$  7.96 (d,  $J = 8.7$  Hz, 2H), 6.95 (d,  $J = 8.7$  Hz, 2H), 3.89 (s, 3H), 2.58 (s, 3H);  $^{13}\text{C}$  NMR (125 MHz,  $\text{CDCl}_3$ )  $\delta$  196.8, 163.5, 130.6, 130.3, 113.7, 55.5, 26.4.

(1) H. Peng, A. Lin, Y. Zhang, H. Jiang, J. Zhou, Y. Cheng, C. Zhu, H. Hu, Oxidation and amination of benzylic  $\text{sp}^3$  C-H bond catalyzed by rhenium(V) complexes, *ACS Catal.* 2 (2012) 163–167.

**Table 2, entry 14**

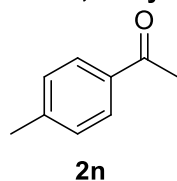

**1-(*p*-tolyl)ethanone (2n).** Oil (107 mg, 80% yield);  $R_f = 0.5$  (hexane:EtOAc = 20:1);  $^1\text{H}$  NMR (500 MHz,  $\text{CDCl}_3$ )  $\delta$  7.87 (d,  $J = 8.1$  Hz, 2H), 7.25 (d,  $J = 8.0$  Hz, 2H), 2.59 (s, 3H), 2.42 (s, 3H);  $^{13}\text{C}$  NMR (125 MHz,  $\text{CDCl}_3$ )  $\delta$  197.9, 143.9, 134.7, 129.3, 128.5, 26.6, 21.7.

(1) H. Peng, A. Lin, Y. Zhang, H. Jiang, J. Zhou, Y. Cheng, C. Zhu, H. Hu, Oxidation and amination of benzylic  $\text{sp}^3$  C-H bond catalyzed by rhenium(V) complexes, *ACS Catal.* 2 (2012) 163–167.

**Table 2, entry 15**

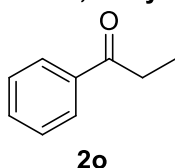

**propiophenone (2o).** Oil (82 mg, 61% yield);  $R_f = 0.67$  (hexane:EtOAc = 20:1);  $^1\text{H}$  NMR (500 MHz,  $\text{CDCl}_3$ )  $\delta$  7.96 (d,  $J = 7.2$  Hz, 2H), 7.54 (t,  $J = 7.4$  Hz, 1H), 7.45 (t,  $J = 7.6$  Hz, 2H), 3.00 (q,  $J = 7.2$  Hz, 2H), 1.22 (t,  $J = 7.2$  Hz, 3H);  $^{13}\text{C}$  NMR (125 MHz,  $\text{CDCl}_3$ )  $\delta$  200.8, 136.9, 132.8, 128.5, 127.9, 31.7, 8.2.

(1) H. Peng, A. Lin, Y. Zhang, H. Jiang, J. Zhou, Y. Cheng, C. Zhu, H. Hu, Oxidation and amination of benzylic  $\text{sp}^3$  C-H bond catalyzed by rhenium(V) complexes, *ACS Catal.* 2 (2012) 163–167.

**Table 2, entry 16**

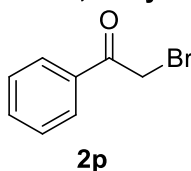

**2-bromo-1-phenylethanone (2p).** White solid (99 mg, 50% yield); mp: 42–43 °C;  $R_f = 0.43$  (hexane:EtOAc = 20:1);  $^1\text{H}$  NMR (500 MHz,  $\text{CDCl}_3$ )  $\delta$  8.01 (d,  $J = 8.4$  Hz, 2H), 7.64 (t,  $J = 7.4$  Hz, 1H), 7.52 (t,  $J = 7.8$  Hz, 2H), 4.49 (s, 2H);  $^{13}\text{C}$  NMR (125 MHz,  $\text{CDCl}_3$ )  $\delta$  191.3, 134.0, 129.0, 128.9, 30.9.

(1) S. Li, B. Zhu, R. Lee, B. Qiao, Visible light-induced selective aerobic oxidative transposition of vinyl halides using a tetrahalogenoferrate(III) complex catalyst, *Org. Chem. Front.* 5 (2018) 380–385.

**Table 2, entry 17**

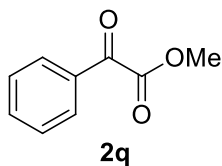

**methyl 2-oxo-2-phenylacetate (2q).** Oil (157 mg, 96% yield);  $R_f = 0.45$  (hexane:EtOAc = 20:1);  $^1\text{H NMR}$  (500 MHz,  $\text{CDCl}_3$ )  $\delta$  8.03 (d,  $J = 7.2$  Hz, 2H), 7.68 (t,  $J = 7.4$  Hz, 1H), 7.53 (t,  $J = 7.9$  Hz, 2H), 4.0 (s, 3H);  $^{13}\text{C NMR}$  (125 MHz,  $\text{CDCl}_3$ )  $\delta$  186.1, 164.0, 135.0, 132.4, 130.1, 128.9, 52.8.

(1) A. Stergiou, A. Bariotaki, D. Kalaitzakis, I. Smonou, Oxone-mediated oxidative cleavage of  $\beta$ -keto esters and 1,3-diketones to  $\alpha$ -keto esters and 1,2-diketones in aqueous medium, *J. Org. Chem.* 78 (2013) 7268–7273.

**Table 2, entry 18**

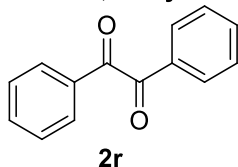

**benzil (2r).** Oil (178 mg, 85% yield);  $R_f = 0.45$  (hexane:EtOAc = 20:1);  $^1\text{H NMR}$  (500 MHz,  $\text{CDCl}_3$ )  $\delta$  7.98 (d,  $J = 7.2$  Hz, 4H), 7.66 (t,  $J = 7.4$  Hz, 2H), 7.52 (t,  $J = 7.9$  Hz, 4H);  $^{13}\text{C NMR}$  (125 MHz,  $\text{CDCl}_3$ )  $\delta$  194.6, 134.9, 133.0, 129.9, 129.1.

(1) G. Urgoitia, R. SanMartin, M. T. Herrero, E. Domínguez, Palladium NCN and CNC pincer complexes as exceptionally active catalysts for aerobic oxidation in sustainable media, *Green Chem.* 13 (2011) 2161–2166.

**Table 2, entry 19**

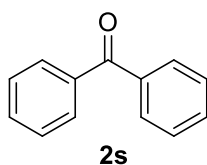

**benzophenone (2s).** Oil (160 mg, 88% yield);  $R_f = 0.46$  (hexane:EtOAc = 15:1);  $^1\text{H NMR}$  (500 MHz,  $\text{CDCl}_3$ )  $\delta$  7.81 (d,  $J = 7.1$  Hz, 4H), 7.60 (t,  $J = 7.4$  Hz, 2H), 7.49 (t,  $J = 7.7$  Hz, 4H);  $^{13}\text{C NMR}$  (125 MHz,  $\text{CDCl}_3$ )  $\delta$  196.8, 137.7, 132.5, 130.1, 128.4.

(1) S. Li, B. Zhu, R. Lee, B. Qiao, Visible light-induced selective aerobic oxidative transposition of vinyl halides using a tetrahalogenoferrate(III) complex catalyst, *Org. Chem. Front.* 5 (2018) 380–385.

**Table 2, entry 20**

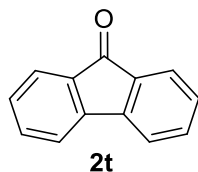

**9H-fluoren-9-one (2t).** Yellow solid (165 mg, 92% yield); mp: 81-82 °C;  $R_f = 0.56$  (hexane:EtOAc = 20:1);  $^1\text{H NMR}$  (500 MHz,  $\text{CDCl}_3$ )  $\delta$  7.63 (d,  $J = 8.0$  Hz, 2H), 7.48-7.44 (m, 4H), 7.28-7.25 (m, 2H);  $^{13}\text{C NMR}$  (125 MHz,  $\text{CDCl}_3$ )  $\delta$  193.9, 144.4, 134.7, 129.1, 124.3, 120.3.

(1) H. Peng, A. Lin, Y. Zhang, H. Jiang, J. Zhou, Y. Cheng, C. Zhu, H. Hu, Oxidation and amination of benzylic  $\text{sp}^3$  C-H bond catalyzed by rhenium(V) complexes, *ACS Catal.* 2 (2012) 163–167.

**Table 2, entry 21**

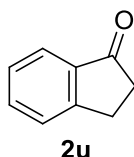

**2,3-dihydro-1H-inden-1-one (2u).** Oil (112 mg, 85% yield);  $R_f = 0.47$  (hexane:EtOAc = 20:1);  $^1\text{H NMR}$  (500 MHz,  $\text{CDCl}_3$ )  $\delta$  7.75 (d,  $J = 7.5$  Hz, 1H), 7.58 (t,  $J = 7.4$  Hz, 1H), 7.47 (d,  $J = 7.2$  Hz, 1H), 7.35 (t,  $J = 7.3$  Hz, 1H), 3.15-3.13 (m, 2H), 2.69-2.67 (m, 2H);  $^{13}\text{C NMR}$  (125 MHz,  $\text{CDCl}_3$ )  $\delta$  207.0, 155.1, 137.0, 134.5, 127.2, 126.6, 123.6, 36.1, 25.7.

(1) H. Peng, A. Lin, Y. Zhang, H. Jiang, J. Zhou, Y. Cheng, C. Zhu, H. Hu, Oxidation and amination of benzylic  $\text{sp}^3$  C-H bond catalyzed by rhenium(V) complexes, *ACS Catal.* 2 (2012) 163–167.

**Table 2, entry 22**

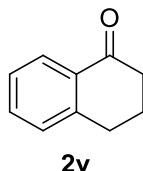

**3,4-dihydronaphthalen-1(2H)-one (2v).** Yellow Oil (112 mg, 77% yield);  $R_f = 0.45$  (hexane:EtOAc = 20:1);  $^1\text{H NMR}$  (500 MHz,  $\text{CDCl}_3$ )  $\delta$  8.03 (d,  $J = 7.9$  Hz, 1H), 7.57 (t,  $J = 7.5$  Hz, 1H), 7.36 (t,  $J = 7.5$  Hz, 1H), 7.35 (d,  $J = 7.9$  Hz, 1H), 2.99 (t,  $J = 6.0$  Hz, 2H), 2.70-2.62 (m, 2H), 2.17-2.10 (m, 2H);  $^{13}\text{C NMR}$  (125 MHz,  $\text{CDCl}_3$ )  $\delta$  198.4,

144.5, 133.4, 132.6, 128.8, 127.2, 126.6, 39.1, 29.7, 23.3.

(1) G. Urgoitia, R. SanMartin, M. T. Herrero, E. Domínguez, Palladium NCN and CNC pincer complexes as exceptionally active catalysts for aerobic oxidation in sustainable media, *Green Chem.* 13 (2011) 2161–2166.

**Table 2, entry 23**

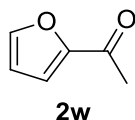

**1-(furan-2-yl)ethanone (2w).** Oil (71 mg, 65% yield);  $R_f = 0.35$  (hexane:EtOAc = 20:1);  $^1\text{H NMR}$  (500 MHz,  $\text{CDCl}_3$ )  $\delta$  7.56 (s, 1H), 7.16 (d,  $J = 3.5$  Hz, 1H), 6.51 (d,  $J = 3.2$  Hz, 1H), 2.45 (s, 3H);  $^{13}\text{C NMR}$  (125 MHz,  $\text{CDCl}_3$ )  $\delta$  186.8, 152.8, 146.4, 117.3, 112.2, 26.0.

(1) Y. Liu, A. Xie, J. Li, X. Xu, W. Dong, B. Wang, Heterocycle-substituted tetrazole ligands for copper-catalysed aerobic oxidation of alcohols, *Tetrahedron*, 70 (2014) 9791–9796.

**Table 2, entry 24**

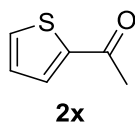

**1-(thiophen-2-yl)ethanone (2x).** Oil (79 mg, 63% yield);  $R_f = 0.5$  (hexane:EtOAc = 15:1);  $^1\text{H NMR}$  (500 MHz,  $\text{CDCl}_3$ )  $\delta$  7.69 (s, 1H), 7.63–7.62 (m, 1H), 7.13–7.12 (m, 1H), 2.54 (s, 3H);  $^{13}\text{C NMR}$  (125 MHz,  $\text{CDCl}_3$ )  $\delta$  190.8, 144.6, 133.8, 132.5, 128.2, 26.9.

(1) Y. Liu, A. Xie, J. Li, X. Xu, W. Dong, B. Wang, Heterocycle-substituted tetrazole ligands for copper-catalysed aerobic oxidation of alcohols, *Tetrahedron*, 70 (2014) 9791–9796.

**Table 2, entry 25**

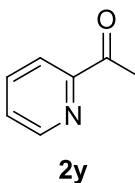

**1-(pyridin-2-yl)ethanone (2y).** Oil (72 mg, 60% yield);  $R_f = 0.35$  (hexane:EtOAc = 10:1);  $^1\text{H NMR}$  (500 MHz,  $\text{CDCl}_3$ )  $\delta$  8.66 (d,  $J = 4.7$  Hz, 1H), 8.01 (d,  $J = 7.9$  Hz, 1H),



7.81 (t,  $J = 7.7$  Hz, 1H), 7.46-4.43 (m, 1H), 2.70 (s, 3H);  $^{13}\text{C}$  NMR (125 MHz,  $\text{CDCl}_3$ )  $\delta$  200.1, 153.5, 148.9, 136.8, 127.1, 121.6, 25.8.

(1) G. Urgoitia, R. SanMartin, M. T. Herrero, E. Domínguez, Palladium NCN and CNC pincer complexes as exceptionally active catalysts for aerobic oxidation in sustainable media, *Green Chem.* 13 (2011) 2161–2166.

**Table 2, entry 33**

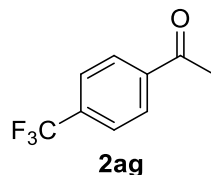

**4-(Trifluoromethyl) acetophenone (2ag).** Oil (178 mg, 95% yield);  $R_f = 0.5$  (hexane: EtOAc = 10:1);  $^1\text{H}$  NMR (500 MHz,  $\text{CDCl}_3$ )  $\delta$  8.08 (d,  $J = 8.1$  Hz, 2H), 7.75 (d,  $J = 8.2$  Hz, 2H), 2.67 (s, 3H);  $^{13}\text{C}$  NMR (125 MHz,  $\text{CDCl}_3$ )  $\delta$  197.0, 139.7, 134.5 (q,  $^2J_{FC} = 32.5$  Hz), 128.6, 125.7 (q,  $^3J_{FC} = 3.75$  Hz), 124.0 (q,  $^1J_{FC} = 235$  Hz), 26.8.

(1) F. Li, N. Wang, L. Lu, G. Zhu, Regioselective hydration of terminal alkynes catalyzed by a neutral gold(I) complex [(IPr)AuCl] and one-pot synthesis of optically active secondary alcohols from terminal alkynes by the combination of [(IPr)AuCl] and  $\text{Cp}^*\text{RhCl}[(R,R)\text{-TsDPEN}]$ , *J. Org. Chem.* 80 (2015) 3538–3546.

**Table 2, entry 34**

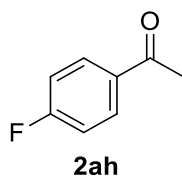

**1-(4-Fluorophenyl)ethanone (2ah).** Oil (122 mg, 89% yield);  $R_f = 0.5$  (hexane: EtOAc = 10:1);  $^1\text{H}$  NMR (500 MHz,  $\text{CDCl}_3$ )  $\delta$  8.01 (dd,  $J = 7.4, 5.4$  Hz, 2H), 7.16 (t,  $J = 8.0$  Hz, 2H), 2.61 (s, 3H);  $^{13}\text{C}$  NMR (125 MHz,  $\text{CDCl}_3$ )  $\delta$  196.4, 165.7 (d,  $J_{C-F} = 254.6$  Hz), 133.5 (d,  $J_{C-F} = 2.9$  Hz), 130.9 (d,  $J_{C-F} = 9.3$  Hz), 115.6 (d,  $J_{C-F} = 21.9$  Hz), 26.5.

(1) F. Li, N. Wang, L. Lu, G. Zhu, Regioselective hydration of terminal alkynes catalyzed by a neutral gold(I) complex [(IPr)AuCl] and one-pot synthesis of optically active secondary alcohols from terminal alkynes by the combination of [(IPr)AuCl] and  $\text{Cp}^*\text{RhCl}[(R,R)\text{-TsDPEN}]$ , *J. Org. Chem.* 80 (2015) 3538–3546.

**Table 2, entry 37**

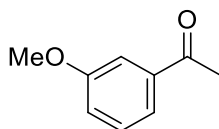

**2ak**

**1,1'-(1,3-phenylene)diethanone (2ak).** Oil (132 mg, 88% yield);  $R_f = 0.33$  (hexane: EtOAc = 20:1);  $^1\text{H NMR}$  (500 MHz,  $\text{CDCl}_3$ )  $\delta$  7.57–7.55 (m, 1H), 7.51 (dd,  $J = 2.5, 1.6$  Hz, 1H), 7.39 (t,  $J = 7.9$  Hz, 1H), 7.14 (ddd,  $J = 8.2, 2.7, 0.8$  Hz, 1H), 3.88 (s, 3H), 2.62 (s, 3H);  $^{13}\text{C NMR}$  (125 MHz,  $\text{CDCl}_3$ )  $\delta$  197.7, 159.5, 138.2, 129.3, 120.9, 119.4, 112.1, 55.2, 26.4.

(1) G. Zhang, S. K. Hanson, Cobalt-catalyzed acceptorless alcohol dehydrogenation: synthesis of imines from alcohols and amines, *Org. Lett.* 15 (2013) 650–653.

**Table 2, entry 38**

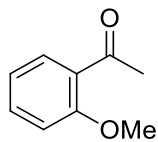

**2al**

**1,1'-(1,2-phenylene)diethanone (2al).** Oil (127 mg, 85% yield);  $R_f = 0.33$  (hexane: EtOAc = 20:1);  $^1\text{H NMR}$  (500 MHz,  $\text{CDCl}_3$ )  $\delta$  7.76 (dd,  $J = 7.7, 1.8$  Hz, 1H), 7.49 (ddd,  $J = 8.5, 7.4, 1.8$  Hz, 1H), 7.02 (t,  $J = 7.6$  Hz, 1H), 6.99 (d,  $J = 8.4$  Hz, 1H), 3.94 (s, 3H), 2.64 (s, 3H);  $^{13}\text{C NMR}$  (125 MHz,  $\text{CDCl}_3$ )  $\delta$  199.6, 158.6, 133.4, 130.1, 120.3, 111.3, 55.2, 31.5.

(1) G. Urgoitia, R. SanMartin, M. T. Herrero, E. Domínguez, Palladium NCN and CNC pincer complexes as exceptionally active catalysts for aerobic oxidation in sustainable media, *Green Chem.* 13 (2011) 2161–2166.

**Table 2, entry 45**

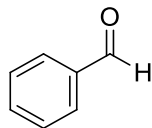

**2as**

**Benzaldehyde (2as).** Oil (101 mg, 96% yield);  $R_f = 0.35$  (hexane: EtOAc = 20:1);  $^1\text{H NMR}$  (500 MHz,  $\text{CDCl}_3$ )  $\delta$  10.05 (s, 1H), 7.91 (d,  $J = 7.0$  Hz, 2H), 7.66 (t,  $J = 7.4$  Hz, 1H), 7.56 (t,  $J = 7.6$  Hz, 2H);  $^{13}\text{C NMR}$  (125 MHz,  $\text{CDCl}_3$ )  $\delta$  192.5, 136.4, 134.5, 130.2, 129.8, 129.0, 128.5.

(1) S. Verma, R. B. N. Baig, M. N. Nadagouda, R. S. Varma, Photocatalytic C-H activation of hydrocarbons over  $\text{VO@g-C}_3\text{N}_4$ , *ACS Sustainable Chem. Eng.* 4

(2016) 2333–2336.

**Table 2, entry 46**

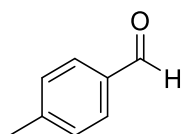

**2at**

**4-methylbenzaldehyde (2at).** Oil (109 mg, 91% );  $R_f = 0.55$  (hexane:EtOAc = 10:1);  $^1\text{H NMR}$  (500 MHz,  $\text{CDCl}_3$ )  $\delta$  9.94 (s, 1H), 7.75 (d,  $J = 8.1$  Hz, 2H), 7.30 (d,  $J = 8.1$  Hz, 2H), 2.41 (s, 3H);  $^{13}\text{C NMR}$  (126 MHz,  $\text{CDCl}_3$ )  $\delta$  191.9, 145.5, 134.1, 129.8, 129.7, 21.8.

(1) X.-J. Yang, Y.-W. Zheng, L.-Q. Zheng, L.-Z. Wu, C.-H. Tung, B. Chen, Visible light-catalytic dehydrogenation of benzylic alcohols to carbonyl compounds by using an eosin Y and nickel-thiolate complex dual catalyst system, *Green Chem.* 21 (2019) 1401–1405.

**Table 2, entry 47**

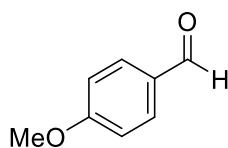

**2au**

**4-methoxybenzaldehyde (2au).** Oil (133 mg, 98% );  $R_f = 0.55$  (hexane:EtOAc = 10:1);  $^1\text{H NMR}$  (500 MHz,  $\text{CDCl}_3$ )  $\delta$  9.88 (s, 1H), 7.84 (d,  $J = 8.6$  Hz, 2H), 7.00 (d,  $J = 8.7$  Hz, 2H), 3.89 (s, 3H);  $^{13}\text{C NMR}$  (126 MHz,  $\text{CDCl}_3$ )  $\delta$  190.8, 164.6, 131.9, 129.9, 114.3, 55.5.

(1) X.-J. Yang, Y.-W. Zheng, L.-Q. Zheng, L.-Z. Wu, C.-H. Tung, B. Chen, Visible light-catalytic dehydrogenation of benzylic alcohols to carbonyl compounds by using an eosin Y and nickel-thiolate complex dual catalyst system, *Green Chem.* 21 (2019) 1401–1405.

**Table 2, entry 48**

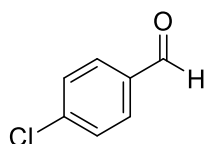

**2av**

**4-chlorobenzaldehyde (2av).** Oil (126 mg, 90% );  $R_f = 0.56$  (hexane:EtOAc = 10:1);  $^1\text{H NMR}$  (500 MHz,  $\text{CDCl}_3$ )  $\delta$  9.98 (s, 1H), 7.82 (d,  $J = 7.6$  Hz, 2H), 7.51 (d,  $J = 7.9$  Hz, 2H);  $^{13}\text{C NMR}$  (126 MHz,  $\text{CDCl}_3$ )  $\delta$  190.8, 140.9, 134.7, 130.9, 129.4.

- (1) X.-J. Yang, Y.-W. Zheng, L.-Q. Zheng, L.-Z. Wu, C.-H. Tung, B. Chen, Visible light-catalytic dehydrogenation of benzylic alcohols to carbonyl compounds by using an eosin Y and nickel-thiolate complex dual catalyst system, *Green Chem.* 21 (2019) 1401–1405.

**Table 2, entry 49**

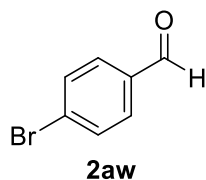

**4-bromobenzaldehyde (2aw).** White solid (164 mg, 89%); mp: 58-59 °C;  $R_f = 0.55$  (hexane:EtOAc = 10:1);  $^1\text{H NMR}$  (500 MHz,  $\text{CDCl}_3$ )  $\delta$  9.99 (s, 1H), 7.76 (d,  $J = 8.3$  Hz, 2H), 7.69 (d,  $J = 8.4$  Hz, 2H);  $^{13}\text{C NMR}$  (126 MHz,  $\text{CDCl}_3$ )  $\delta$  191.1, 135.0, 132.4, 130.9, 129.8.

- (1) Z. Wei, S. Ru, Q. Zhao, H. Yu, G. Zhang, Y. Wei, Highly efficient and practical aerobic oxidation of alcohols by inorganic-ligand supported copper catalysis, *Green Chem.* 21 (2019) 4069–4075.

**Table 2, entry 50**

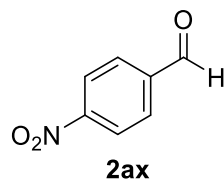

**4-nitrobenzaldehyde (2ax).** yellow solid (128 mg, 85%); mp: 105-106 °C;  $R_f = 0.43$  (hexane:EtOAc = 10:1);  $^1\text{H NMR}$  (500 MHz,  $\text{CDCl}_3$ )  $\delta$  10.17 (s, 1H), 8.40 (dd,  $J = 8.5$ , 1.3 Hz, 2H), 8.09 (dd,  $J = 8.6$ , 1.5 Hz, 2H);  $^{13}\text{C NMR}$  (126 MHz,  $\text{CDCl}_3$ )  $\delta$  190.3, 151.1, 140.0, 130.5, 124.3.

- (1) Z. Wei, S. Ru, Q. Zhao, H. Yu, G. Zhang, Y. Wei, Highly efficient and practical aerobic oxidation of alcohols by inorganic-ligand supported copper catalysis, *Green Chem.* 21 (2019) 4069–4075.

**Table 2, entry 51**

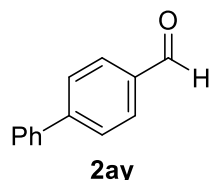

**[1,1'-biphenyl]-4-carbaldehyde (2ay).** White solid (138 mg, 76%); mp: 57-59 °C;  $R_f = 0.53$  (hexane:EtOAc = 10:1);  $^1\text{H NMR}$  (500 MHz,  $\text{CDCl}_3$ )  $\delta$  10.08 (s, 1H), 7.97 (d,  $J = 8.3$  Hz, 2H), 7.77 (d,  $J = 8.2$  Hz, 2H), 7.70–7.64 (m, 2H), 7.51 (dd,  $J = 10.3$ , 4.7 Hz,

2H), 7.45 (dd,  $J = 8.4, 6.3$  Hz, 1H).  $^{13}\text{C}$  NMR (126 MHz,  $\text{CDCl}_3$ )  $\delta$  191.9, 147.2, 139.7, 135.2, 130.3, 129.0, 128.5, 127.7, 127.4.

(1) S. Lan, X. Yang, K. Shi, R. Fan, D. Ma, Pillarquinone-based porous polymer for a highly-efficient heterogeneous organometallic catalysis, *ChemCatChem* 11 (2019) 2864–2869.

**Table 2, entry 52**

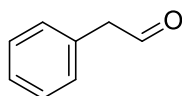

**2az**

**2-phenylacetaldehyde (2aa).** Oil (95 mg, 79% );  $R_f = 0.65$  (hexane:EtOAc = 10:1);  $^1\text{H}$  NMR (500 MHz,  $\text{CDCl}_3$ )  $\delta$  9.77 (t,  $J = 2.4$  Hz, 1H), 7.41 (t,  $J = 7.4$  Hz, 2H), 7.35 (t,  $J = 7.4$  Hz, 1H), 7.26 (d,  $J = 7.2$  Hz, 2H), 3.72 (d,  $J = 2.3$  Hz, 2H);  $^{13}\text{C}$  NMR (126 MHz,  $\text{CDCl}_3$ )  $\delta$  199.5, 131.9, 129.6, 129.0, 127.4, 50.5.

(1) M. Schönberger, D. Trauner, A Photochromic Agonist for  $\mu$ -Opioid Receptors, *Angew. Chem. Int. Ed.* 53 (2014) 3264–3267.

**Table 2, entry 53**

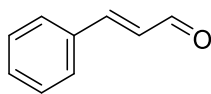

**2aaa**

**Cinnamaldehyde (2aaa).** Oil (46 mg, 35% );  $R_f = 0.60$  (hexane:EtOAc = 10:1);  $^1\text{H}$  NMR (500 MHz,  $\text{CDCl}_3$ )  $\delta$  9.71 (d,  $J = 7.7$  Hz, 1H), 7.60–7.54 (m, 2H), 7.52–7.40 (m, 4H), 6.73 (dd,  $J = 16.0, 7.7$  Hz, 1H);  $^{13}\text{C}$  NMR (126 MHz,  $\text{CDCl}_3$ )  $\delta$  193.7, 152.8, 134.0, 131.3, 129.1, 128.5, 128.5.

(1) W. Huang, B. C. Ma, H. Lu, R. Li, L. Wang, K. Landfester, K. A. I. Zhang, Visible-light-promoted selective oxidation of alcohols using a covalent triazine framework, *ACS Catal.* 7 (2017) 5438–5442.

$^1\text{H}$  NMR and  $^{13}\text{C}$  NMR Spectrum of **2f**

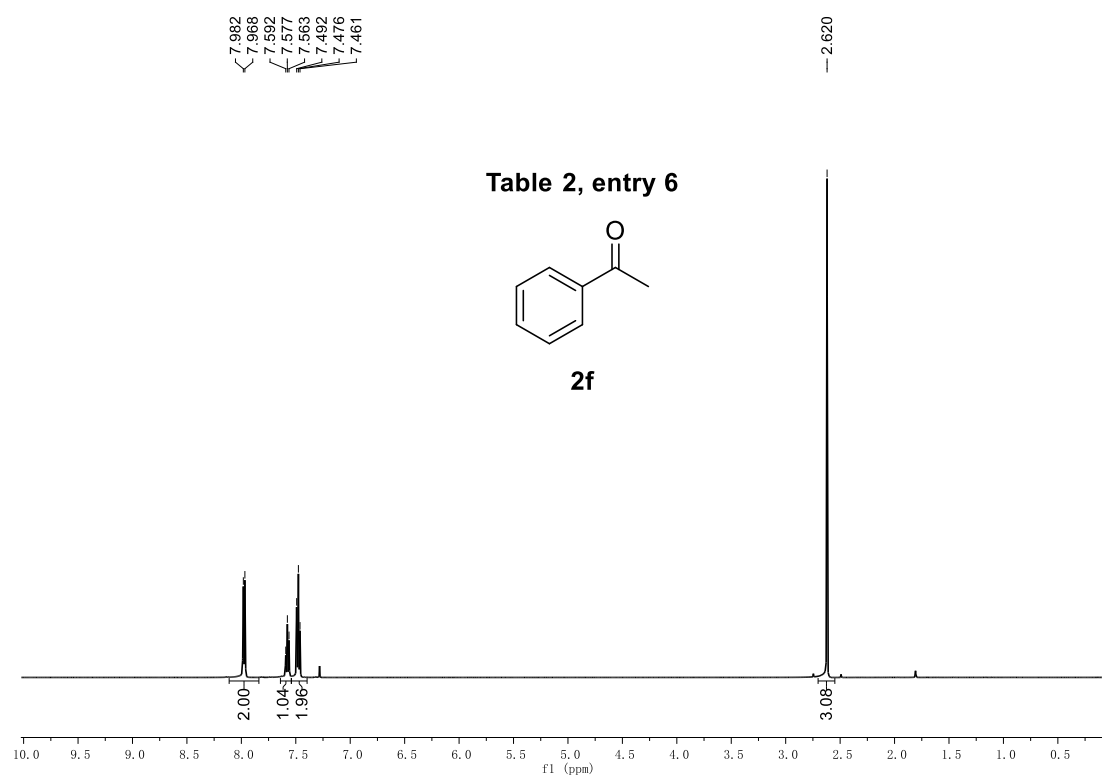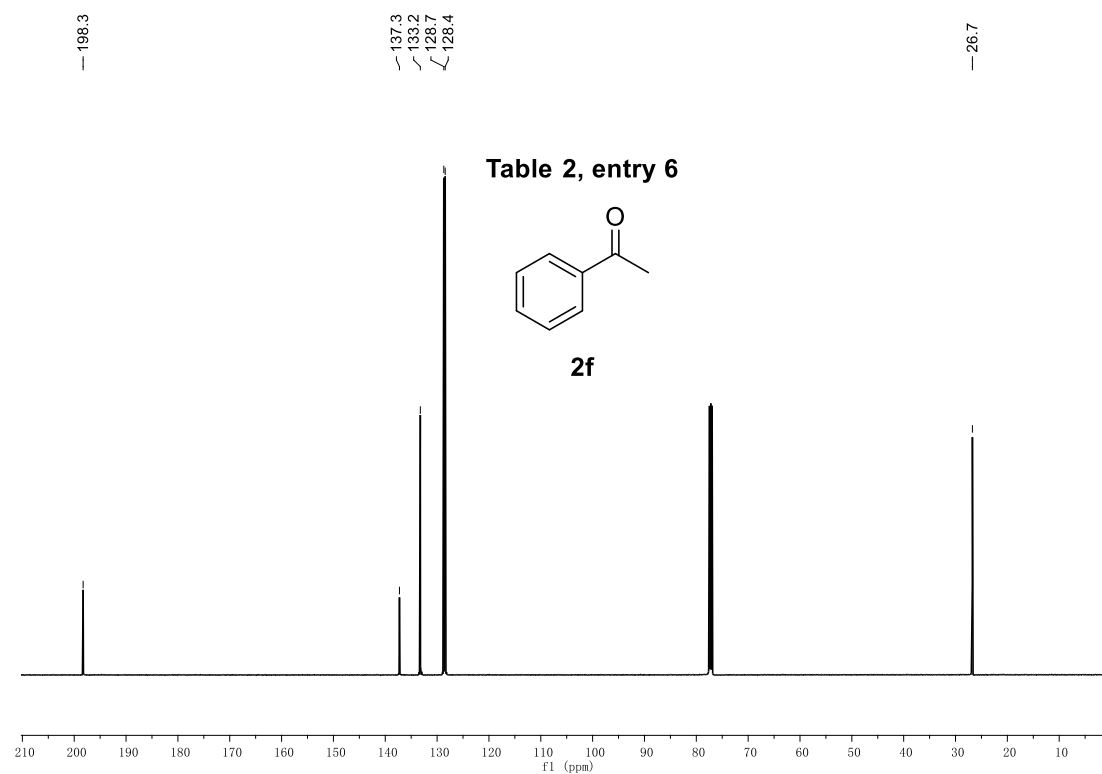

<sup>1</sup>H NMR and <sup>13</sup>C NMR Spectrum of **2g**

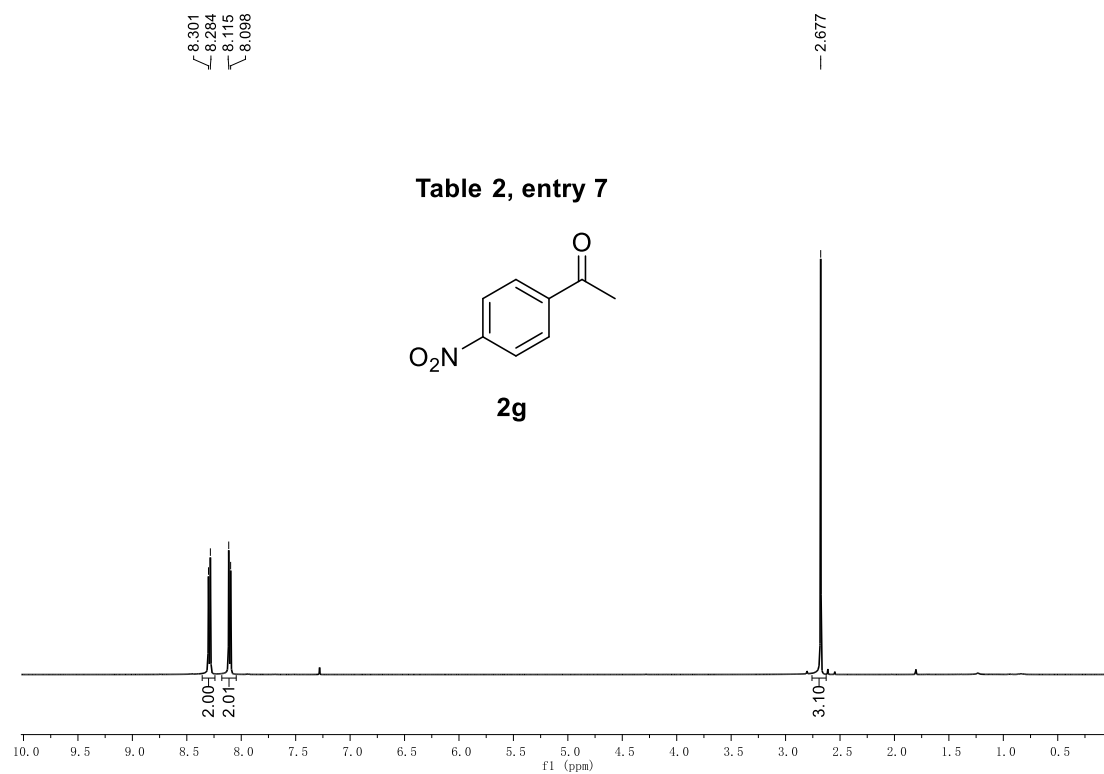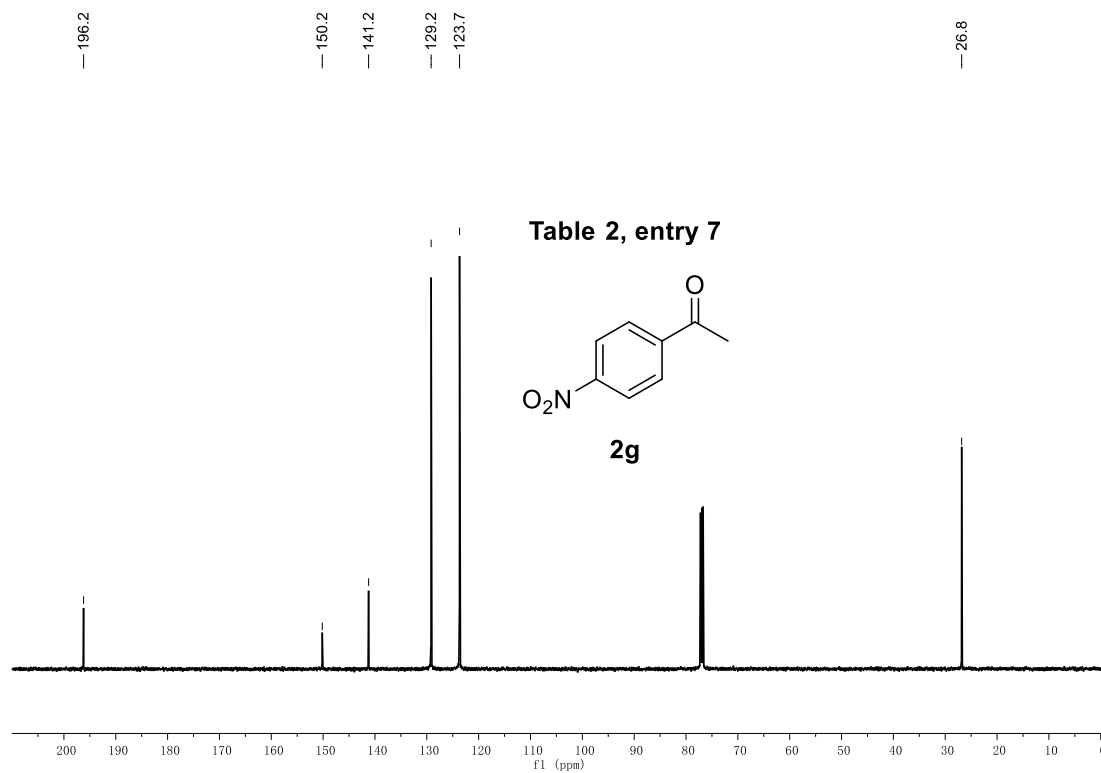

<sup>1</sup>H NMR and <sup>13</sup>C NMR Spectrum of **2h**

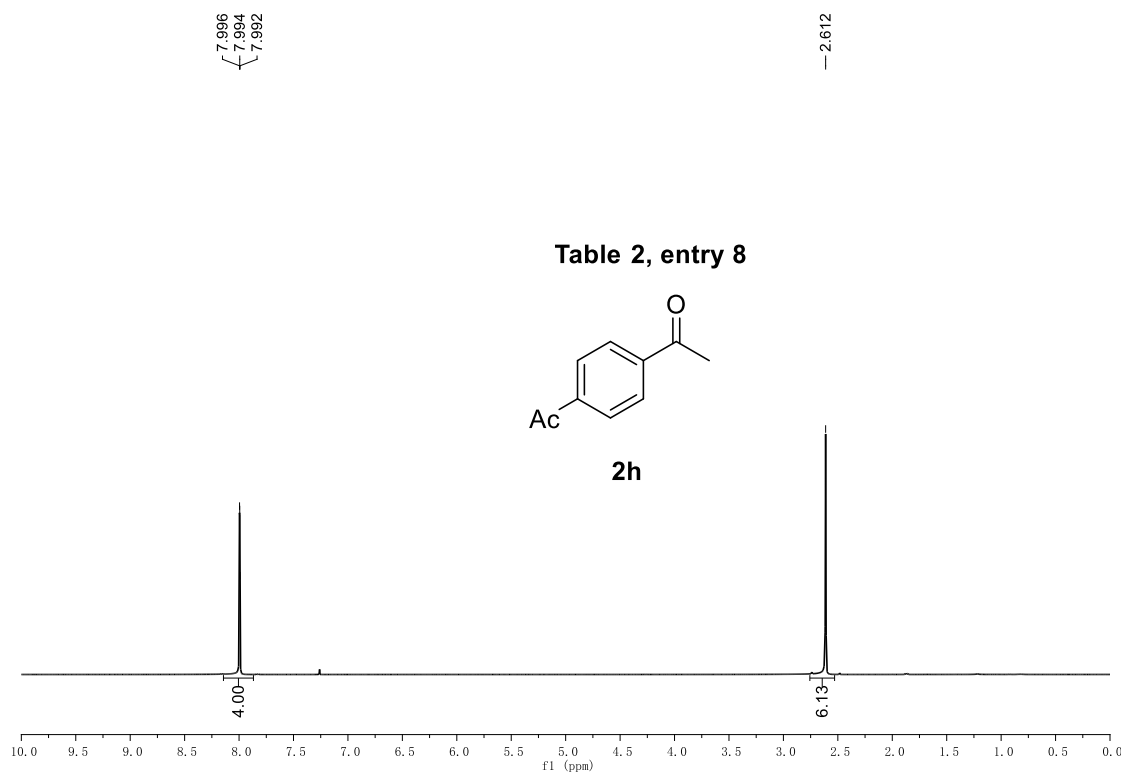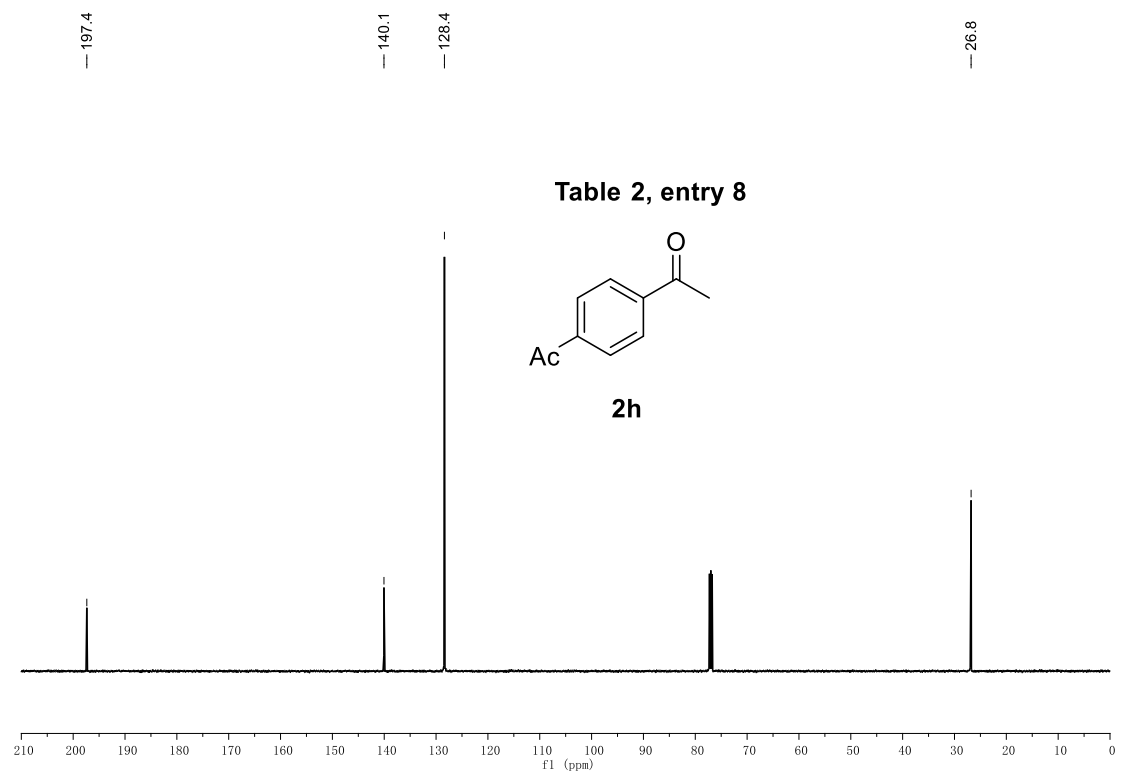



<sup>1</sup>H NMR and <sup>13</sup>C NMR Spectrum of **2i**

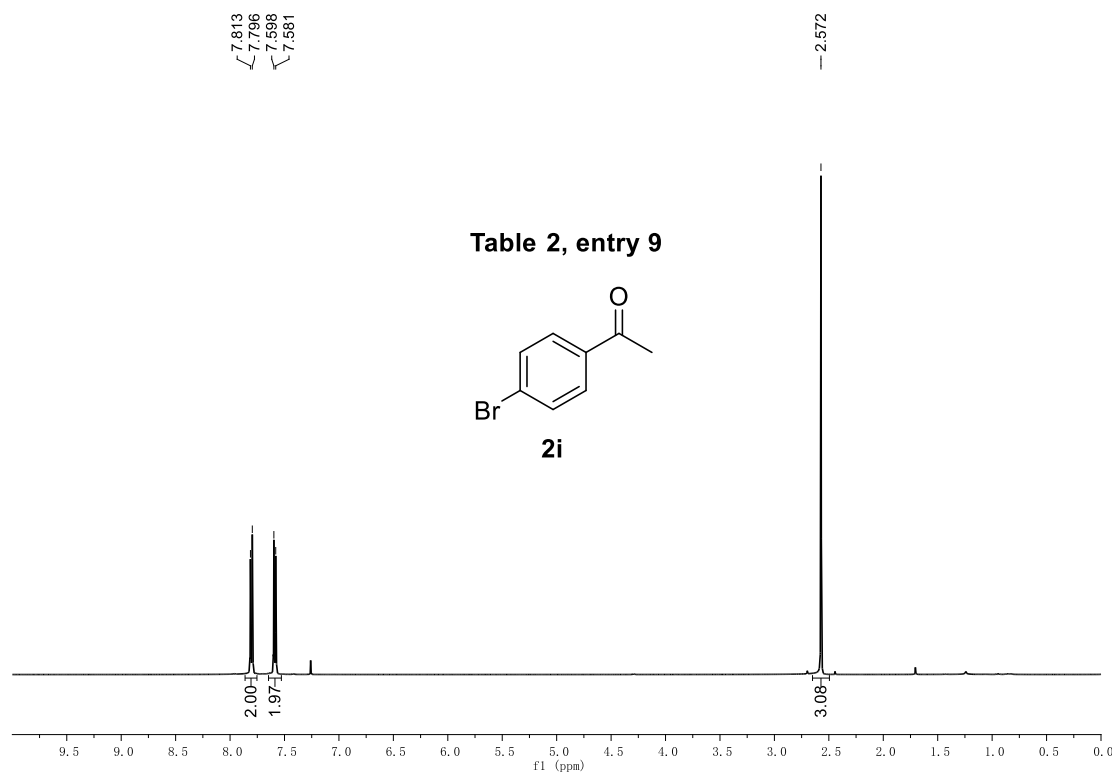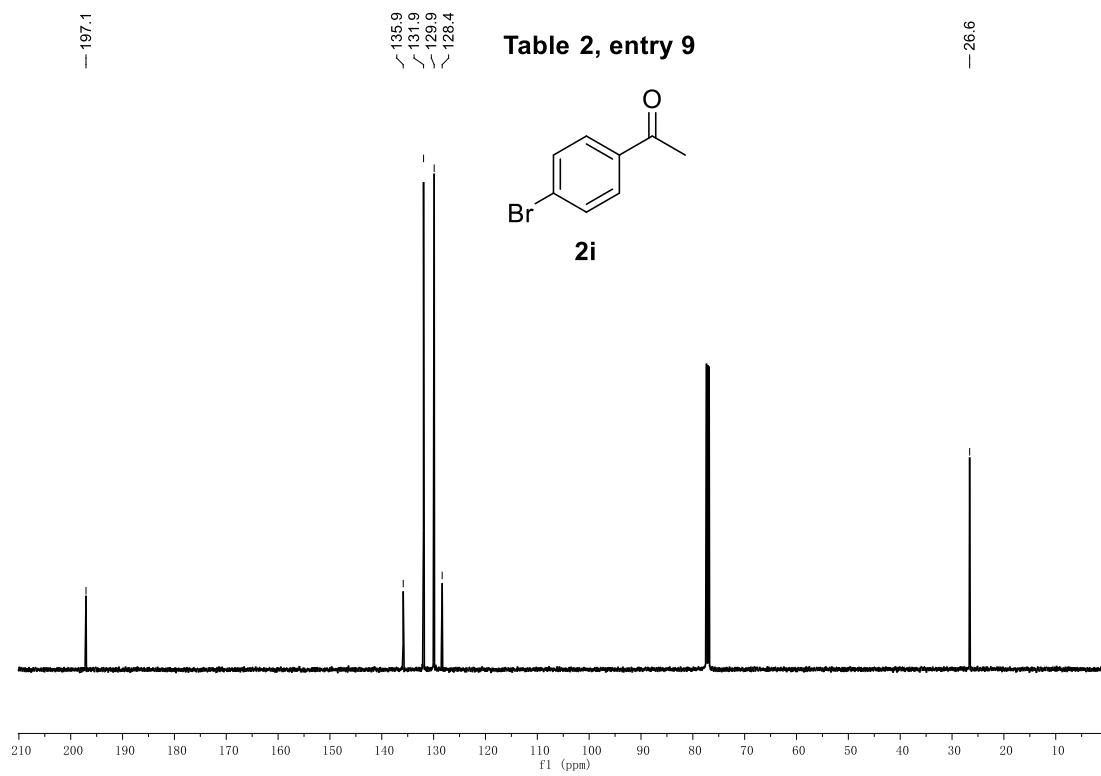

<sup>1</sup>H NMR and <sup>13</sup>C NMR Spectrum of **2j**

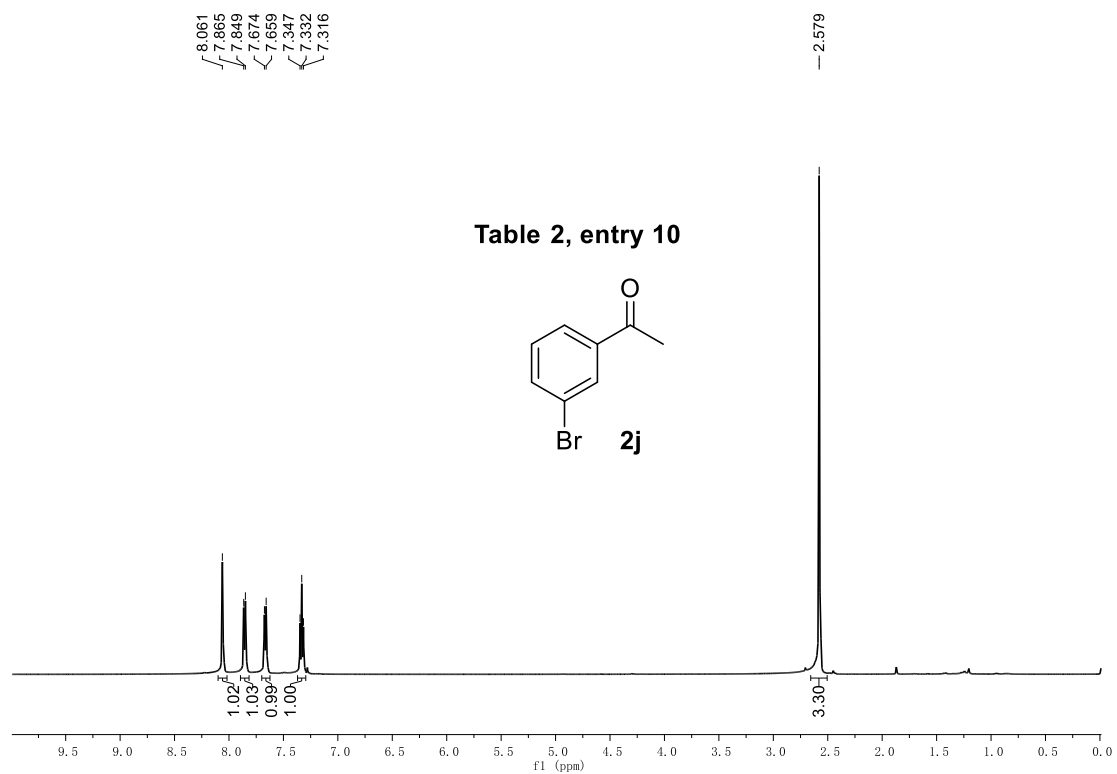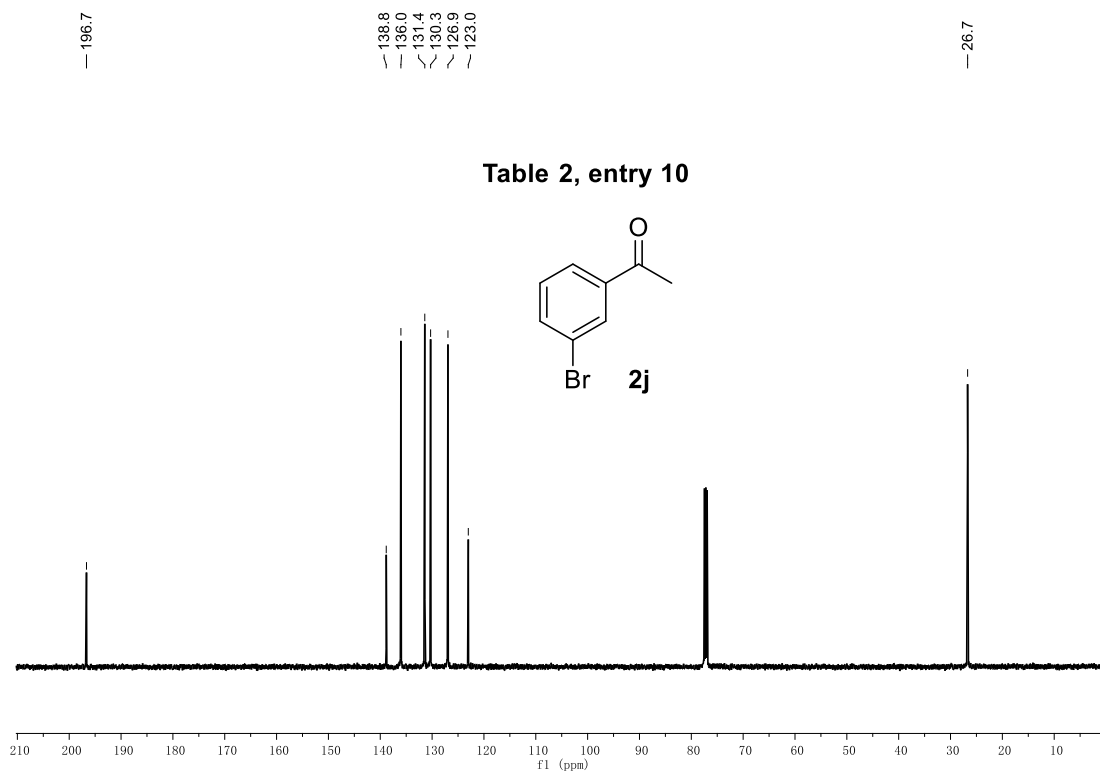

<sup>1</sup>H NMR and <sup>13</sup>C NMR Spectrum of **2k**

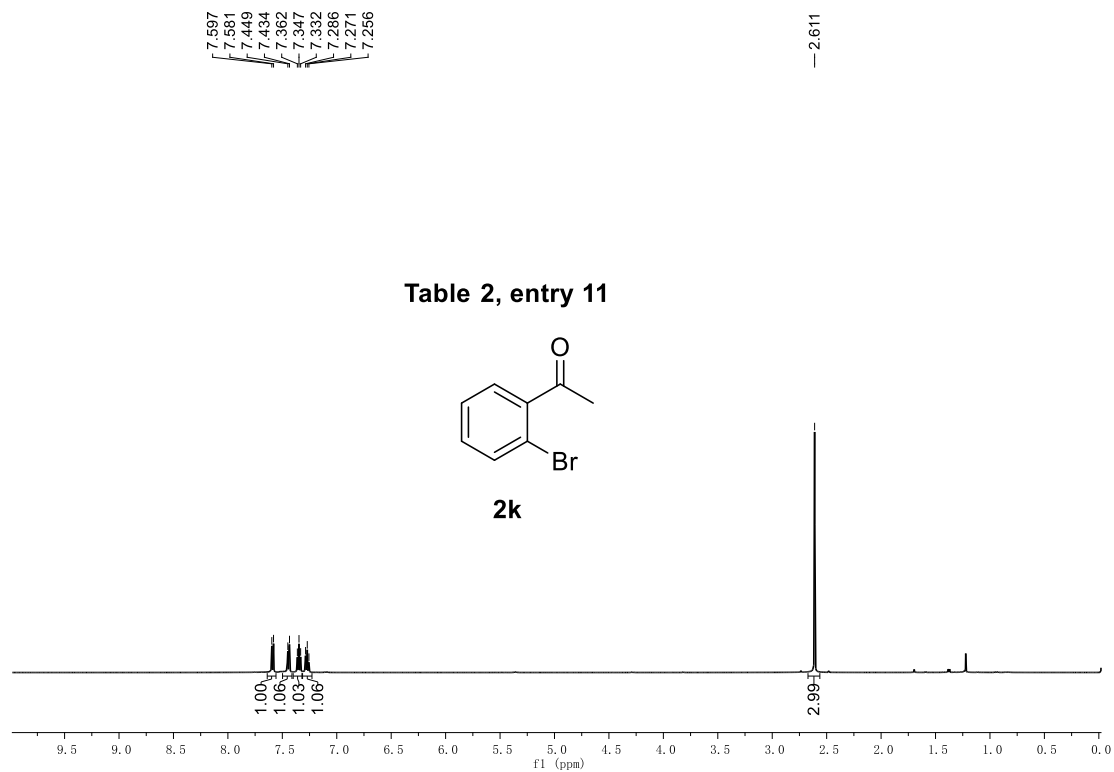

Table 2, entry 11

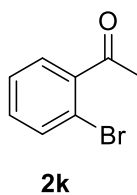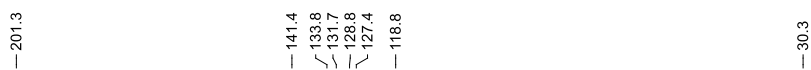

Table 2, entry 11

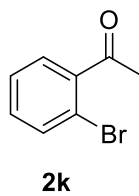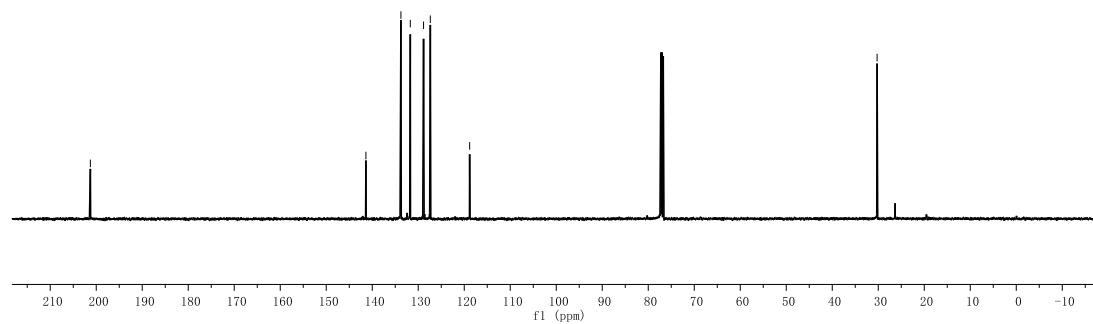

<sup>1</sup>H NMR and <sup>13</sup>C NMR Spectrum of **2I**

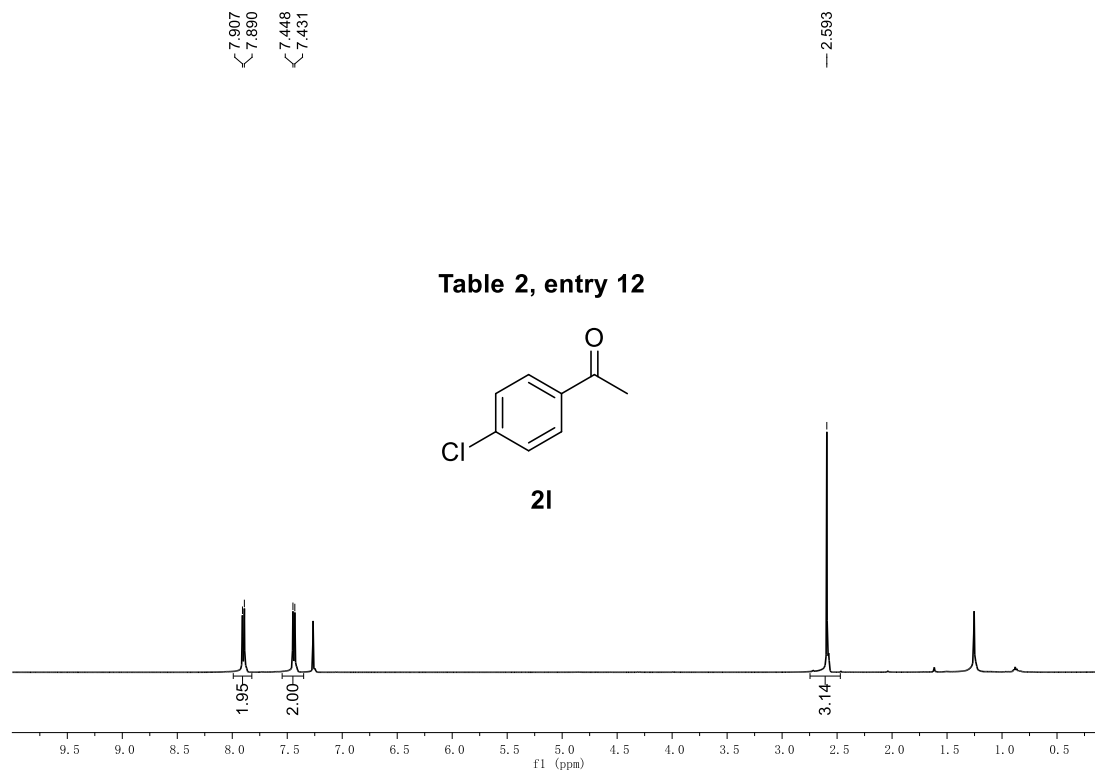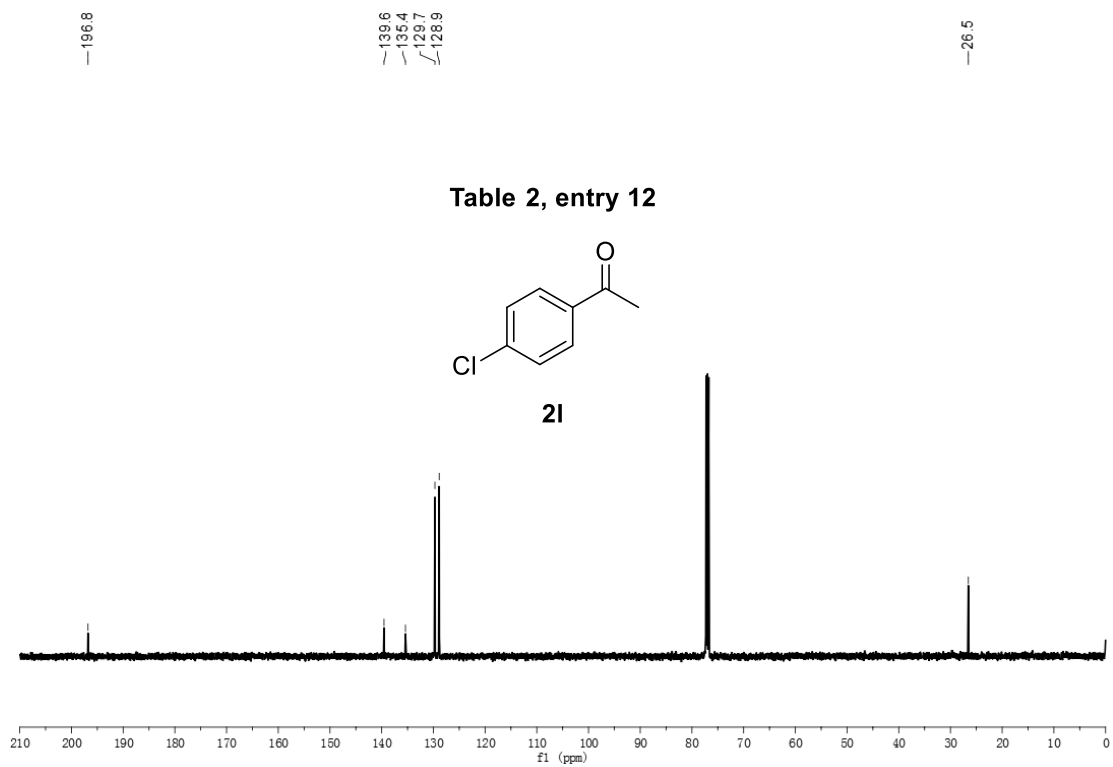

<sup>1</sup>H NMR and <sup>13</sup>C NMR Spectrum of **2m**

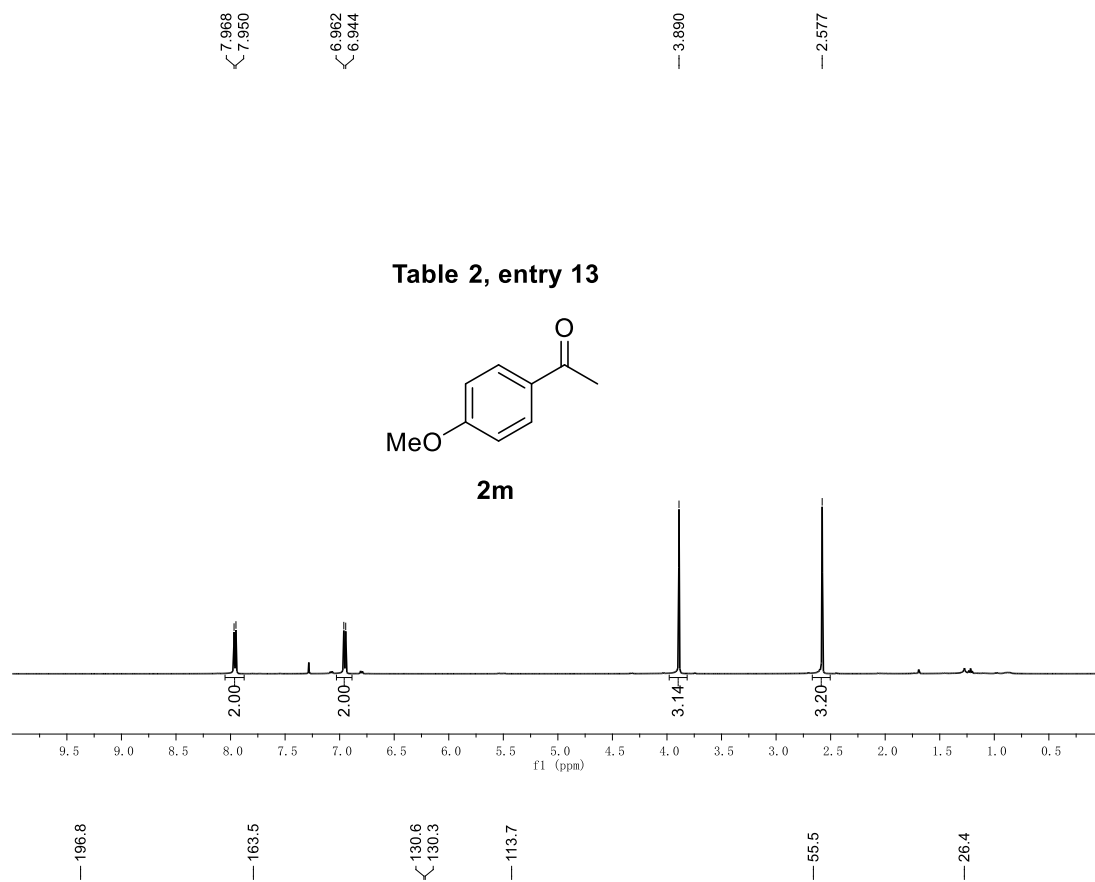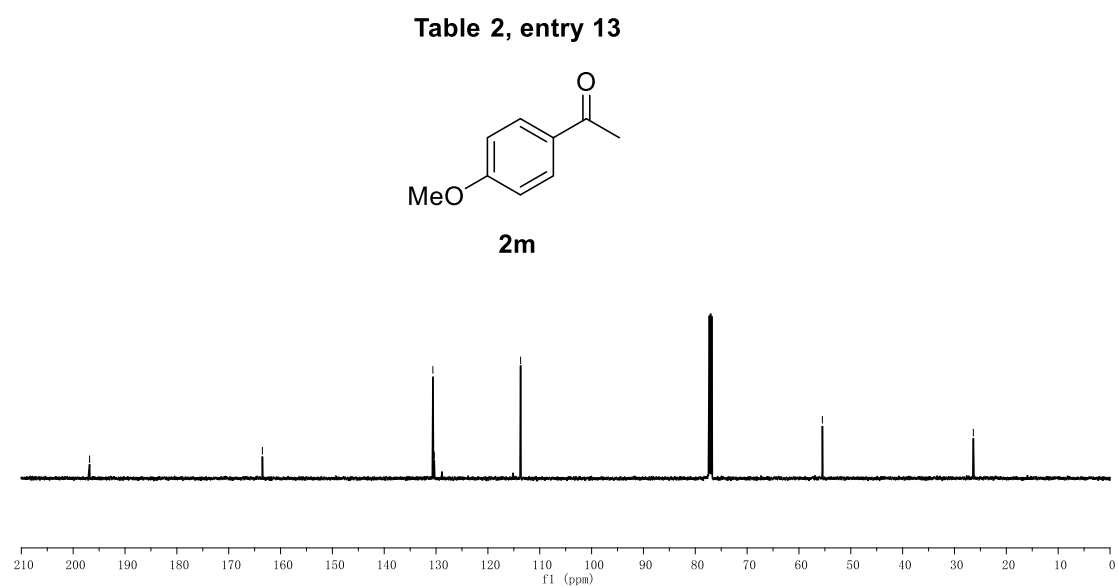

<sup>1</sup>H NMR and <sup>13</sup>C NMR Spectrum of **2n**

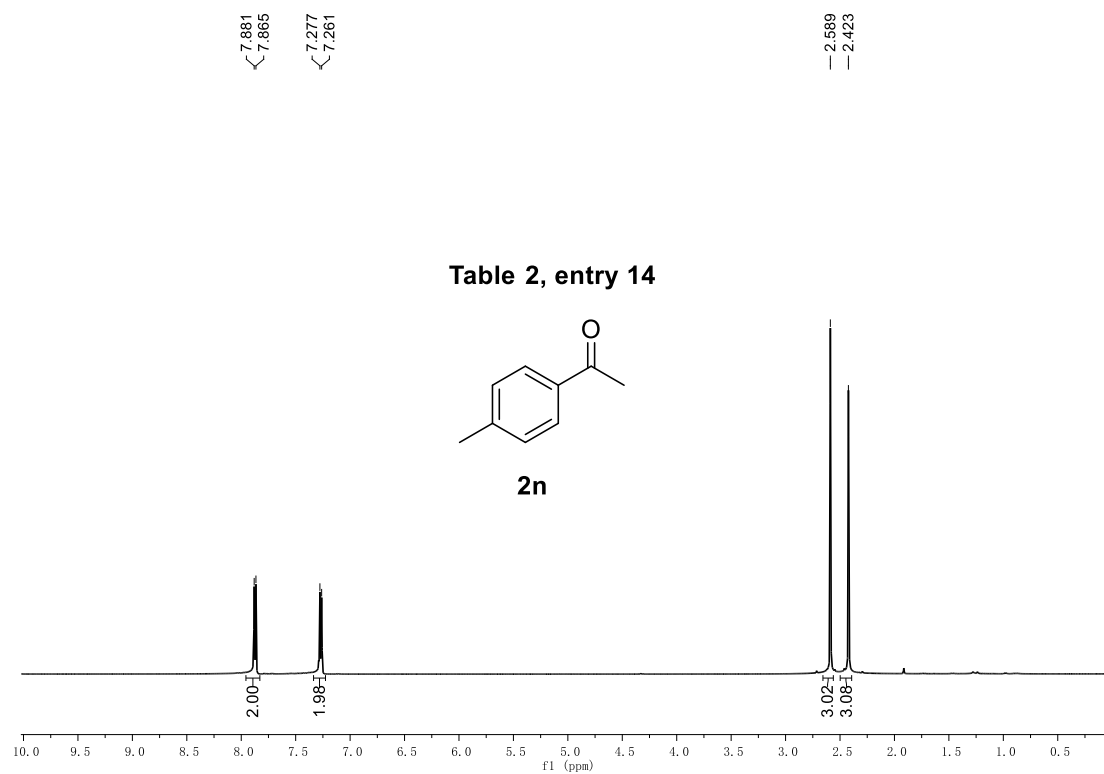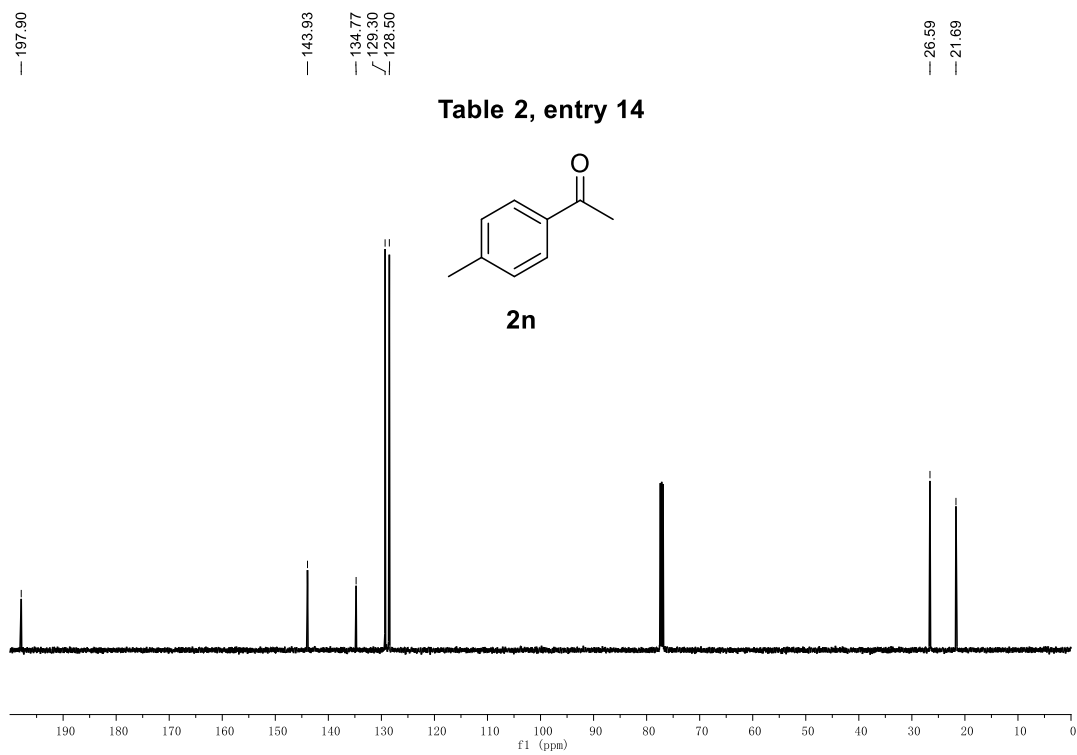

# <sup>1</sup>H NMR and <sup>13</sup>C NMR Spectrum of **2o**

7.970  
7.955  
7.559  
7.545  
7.530  
7.466  
7.451  
7.436

3.023  
3.009  
2.994  
2.980

1.239  
1.224  
1.210

Table 2, entry 15

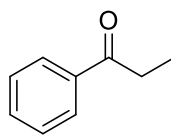

**2o**

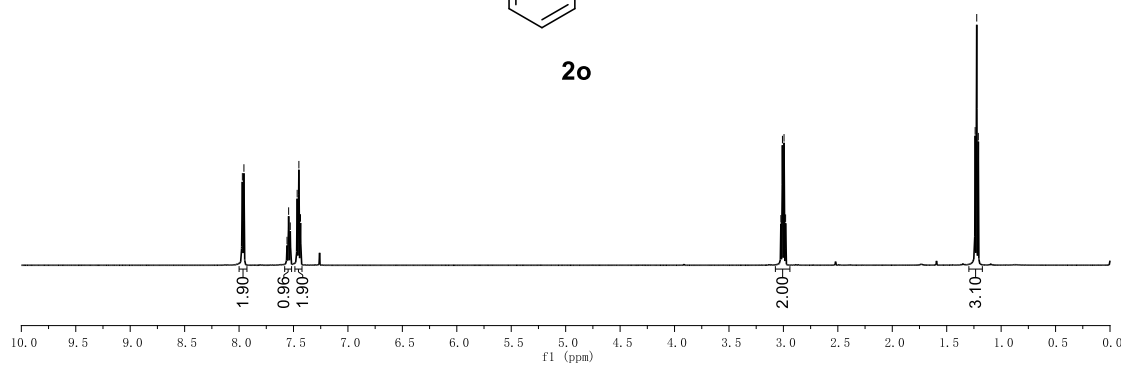

200.8

136.9  
132.8  
128.5  
127.9

31.7

8.2

Table 2, entry 15

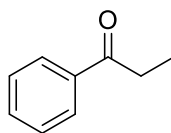

**2o**

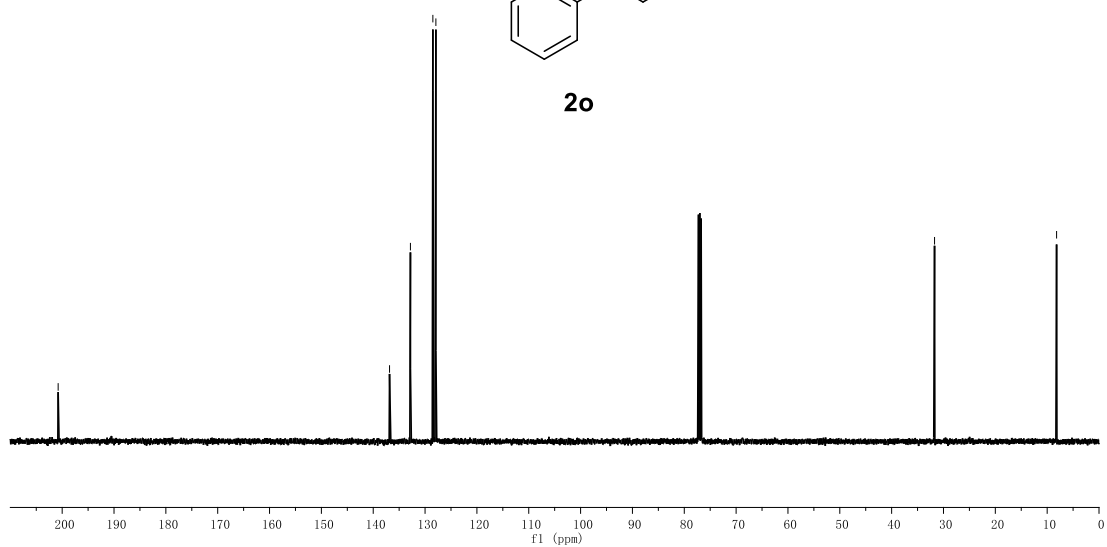

<sup>1</sup>H NMR and <sup>13</sup>C NMR Spectrum of **2p**

8.025  
8.008  
7.657  
7.642  
7.627  
7.542  
7.526  
7.510

4.488

Table 2, entry 16

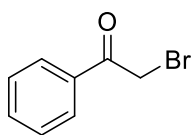

**2p**

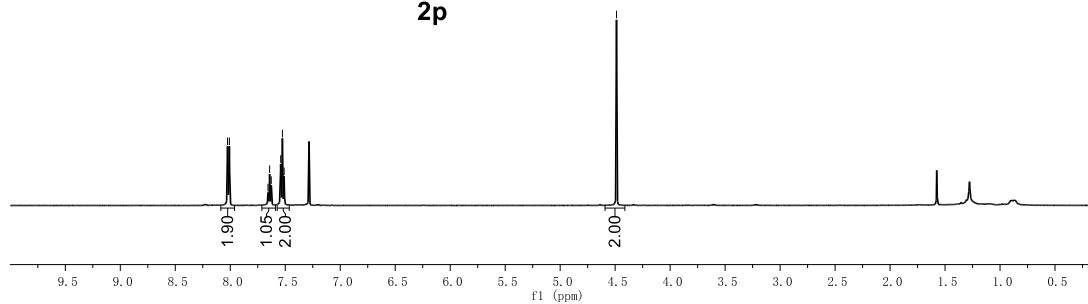

191.3

134.0  
129.0  
128.9

30.9

Table 2, entry 16

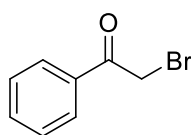

**2p**

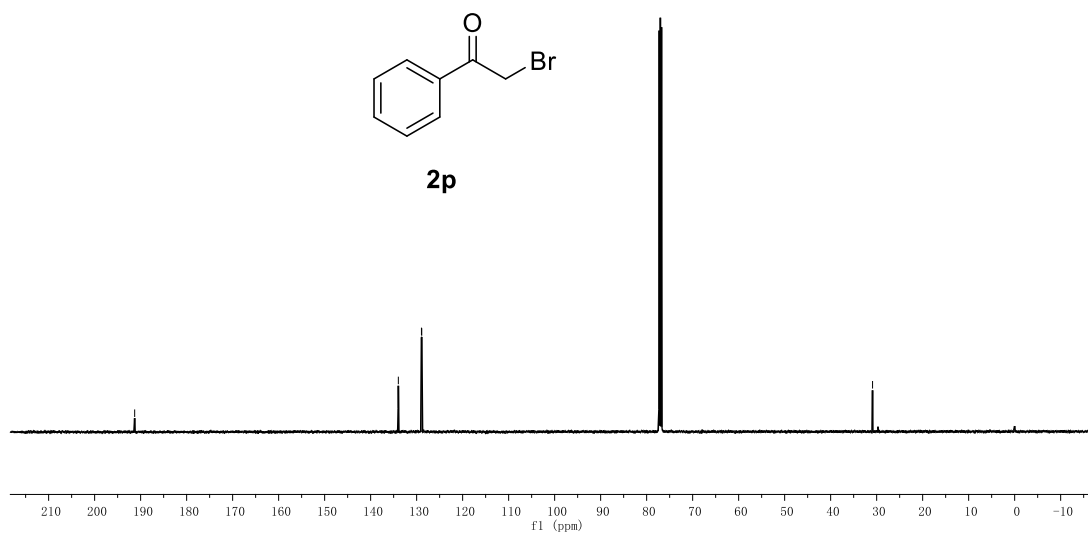



<sup>1</sup>H NMR and <sup>13</sup>C NMR Spectrum of **2q**

8.04  
8.03  
7.70  
7.68  
7.67  
7.55  
7.53  
7.52

4.00

Table 2, entry 17

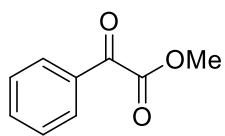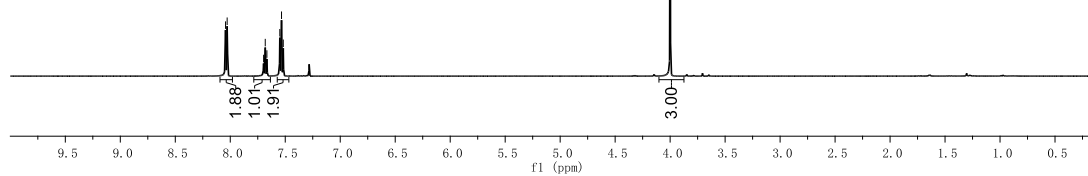

186.1

164.0

135.0

132.4

130.1

128.9

52.8

Table 2, entry 17

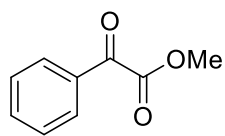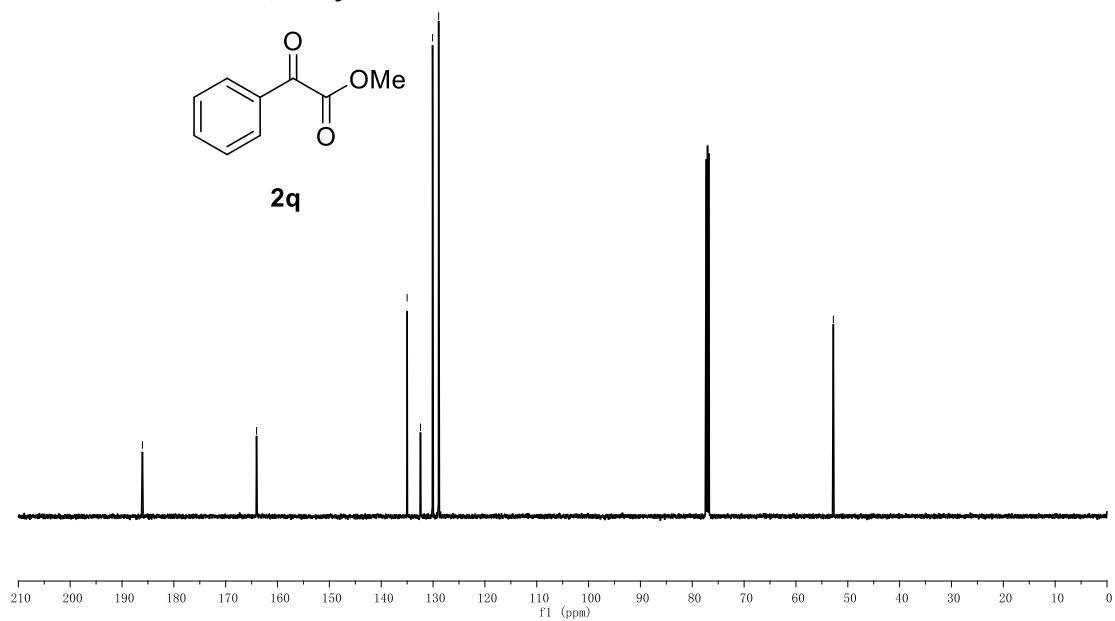

<sup>1</sup>H NMR and <sup>13</sup>C NMR Spectrum of **2r**

7.99  
7.97  
7.66  
7.66  
7.55  
7.52  
7.50

Table 2, entry 18

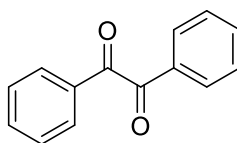

**2r**

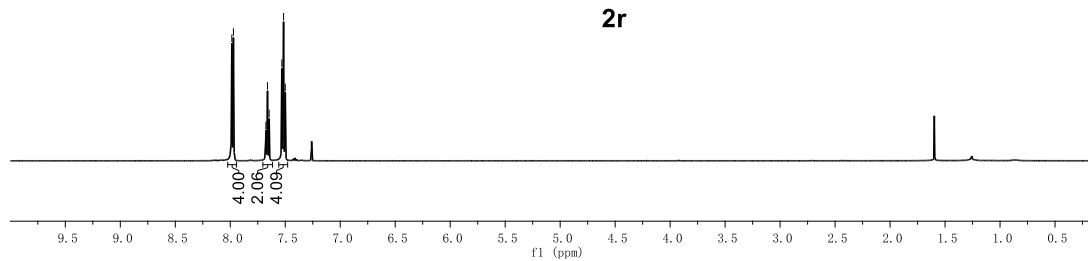

194.6

134.9  
133.0  
129.9  
128.1

Table 2, entry 18

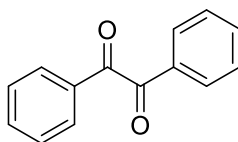

**2r**

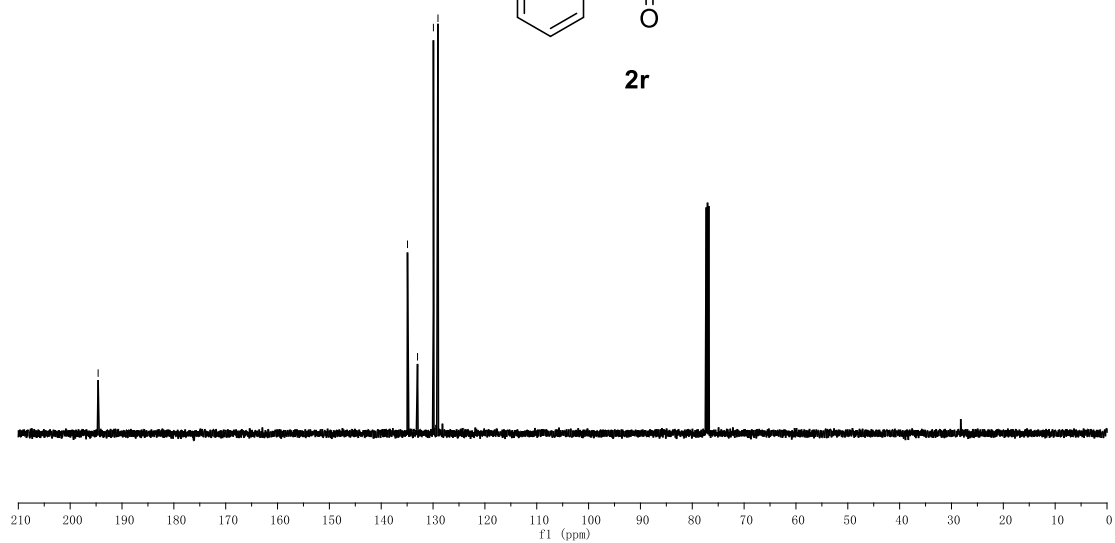

<sup>1</sup>H NMR and <sup>13</sup>C NMR Spectrum of **2s**

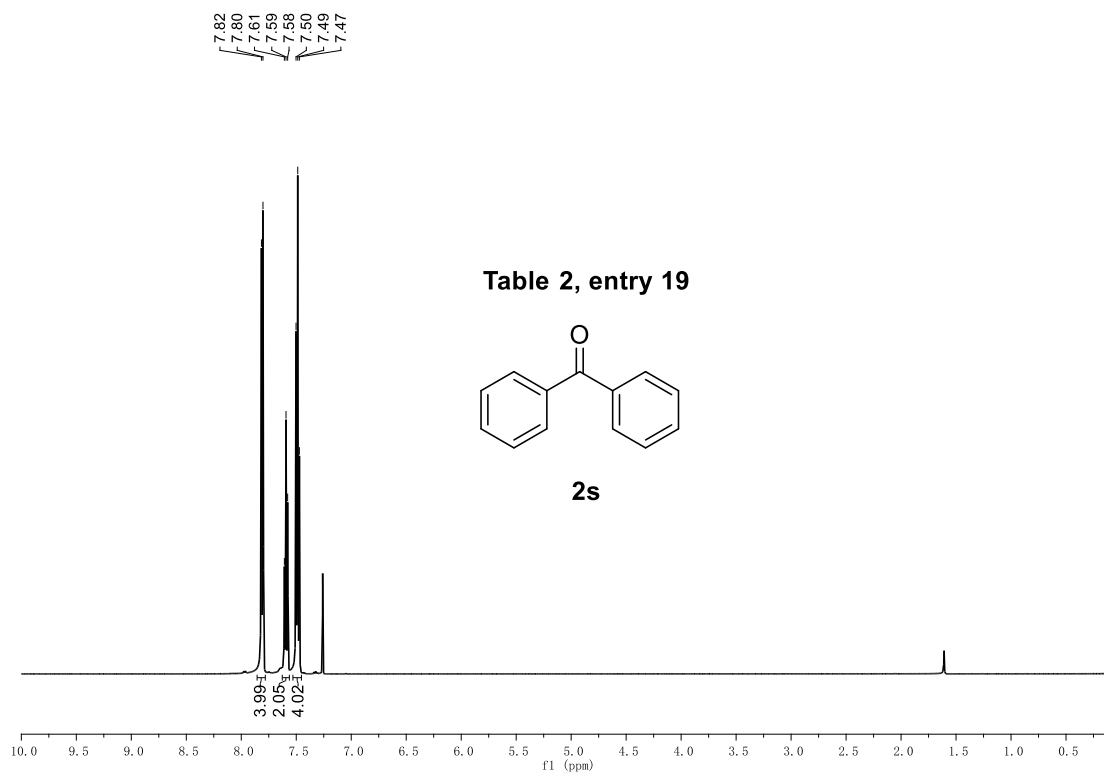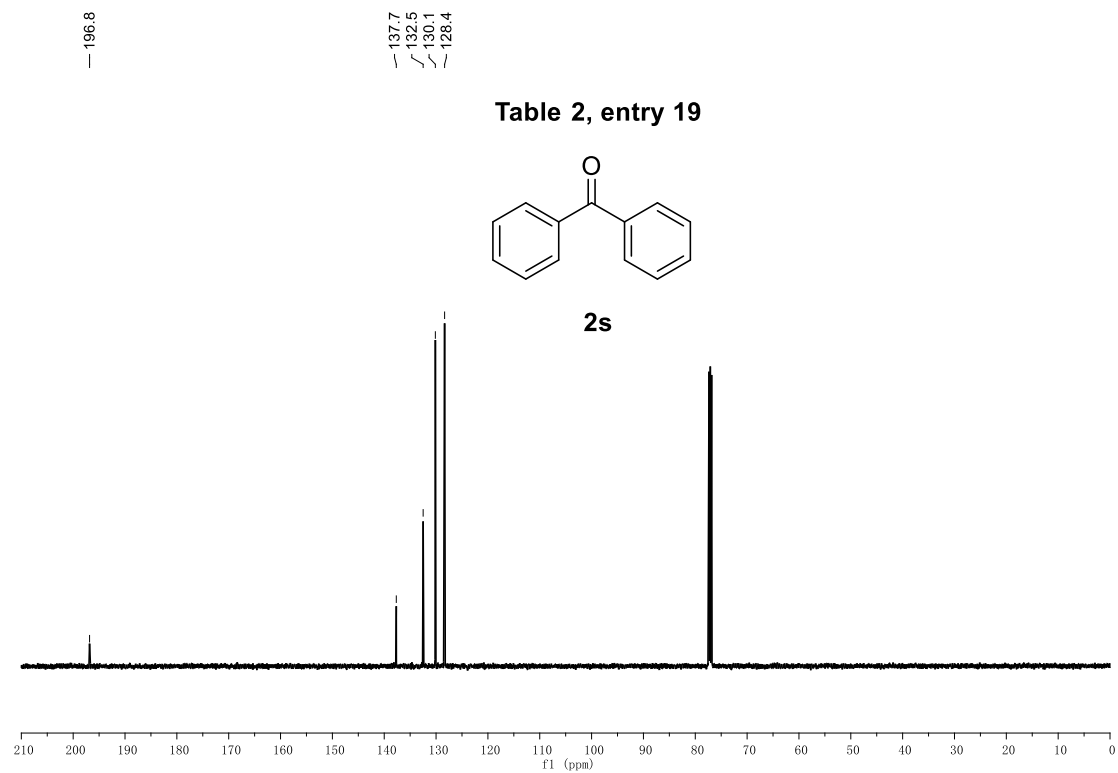

<sup>1</sup>H NMR and <sup>13</sup>C NMR Spectrum of **2t**

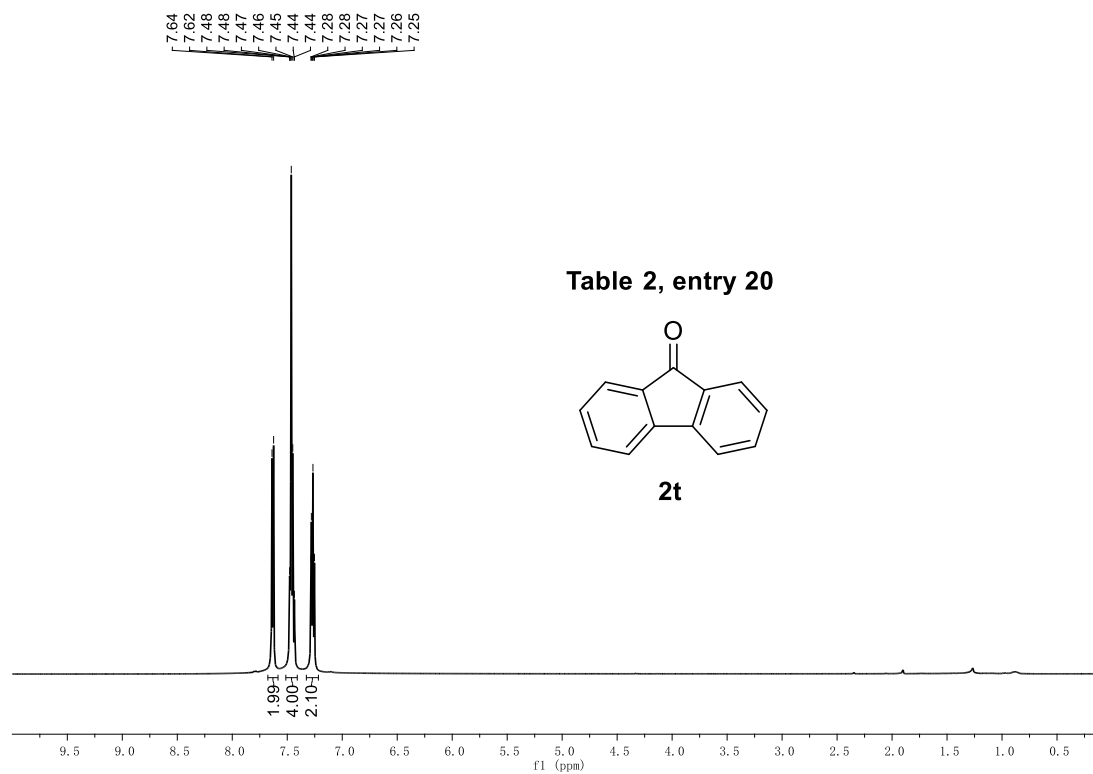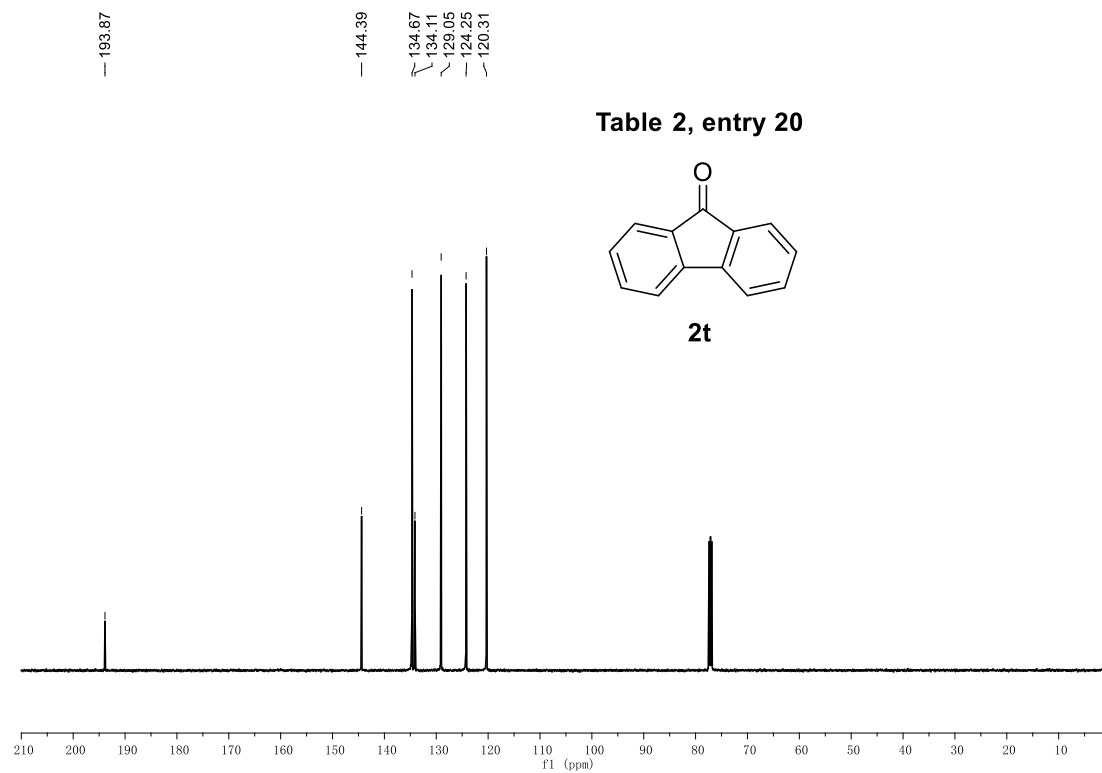

<sup>1</sup>H NMR and <sup>13</sup>C NMR Spectrum of **2u**

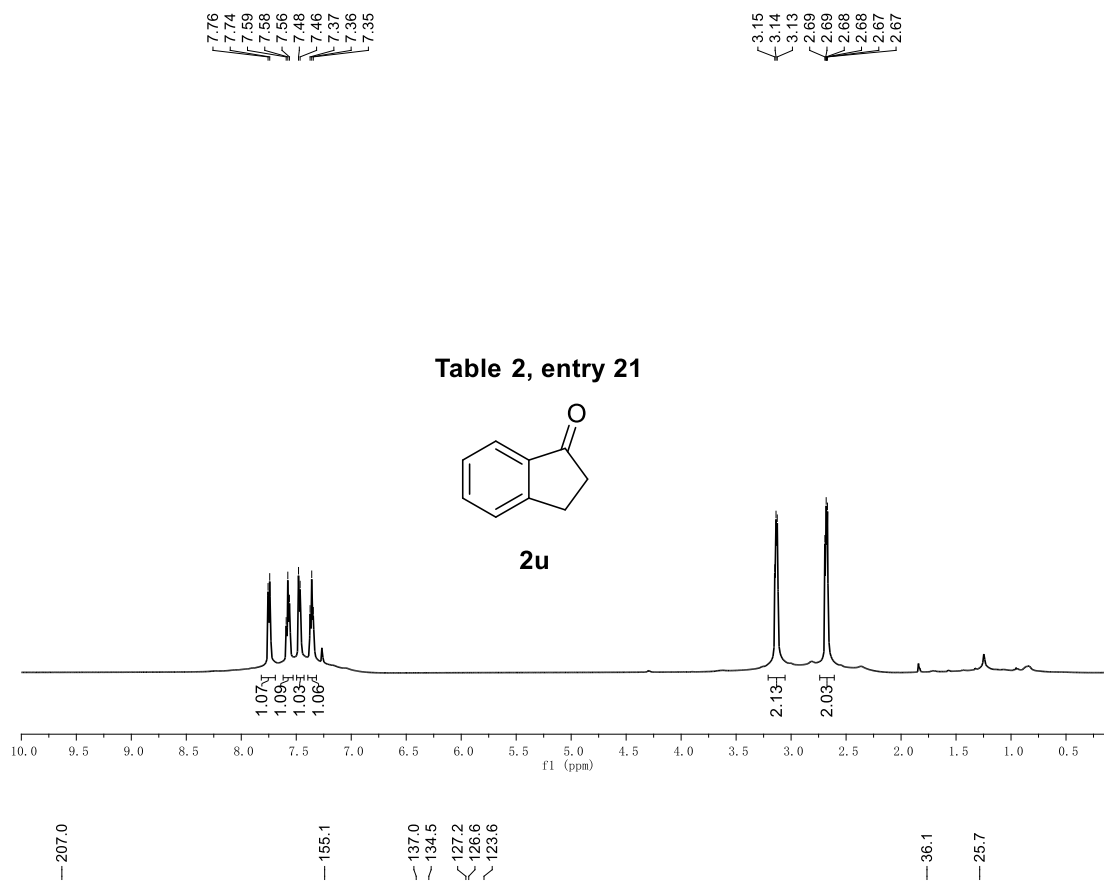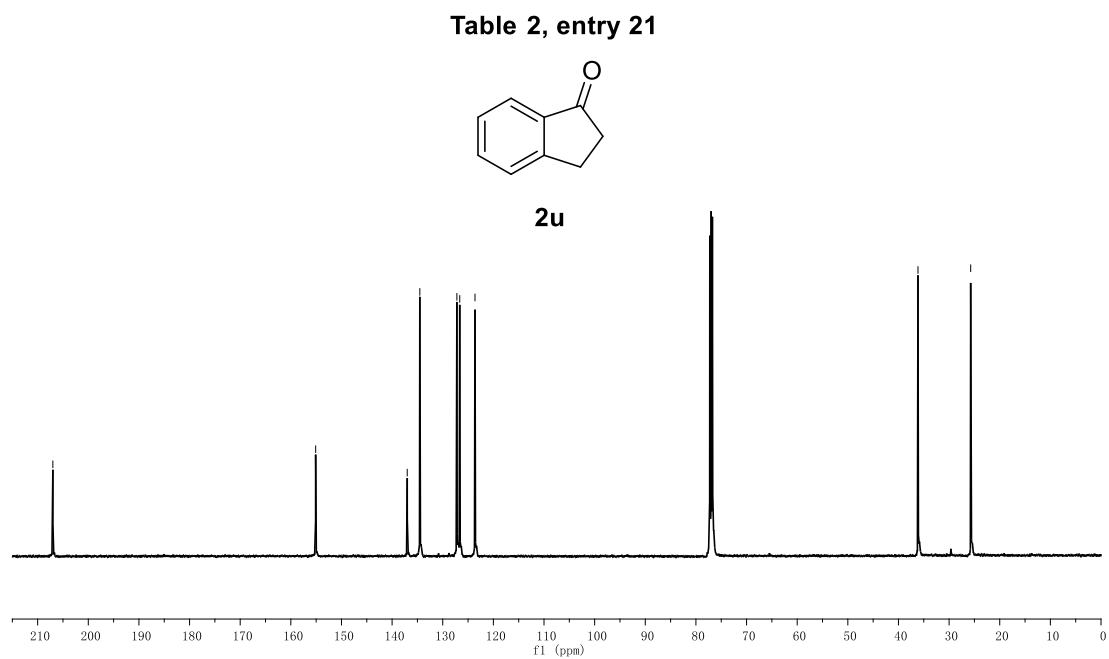

<sup>1</sup>H NMR and <sup>13</sup>C NMR Spectrum of **2v**

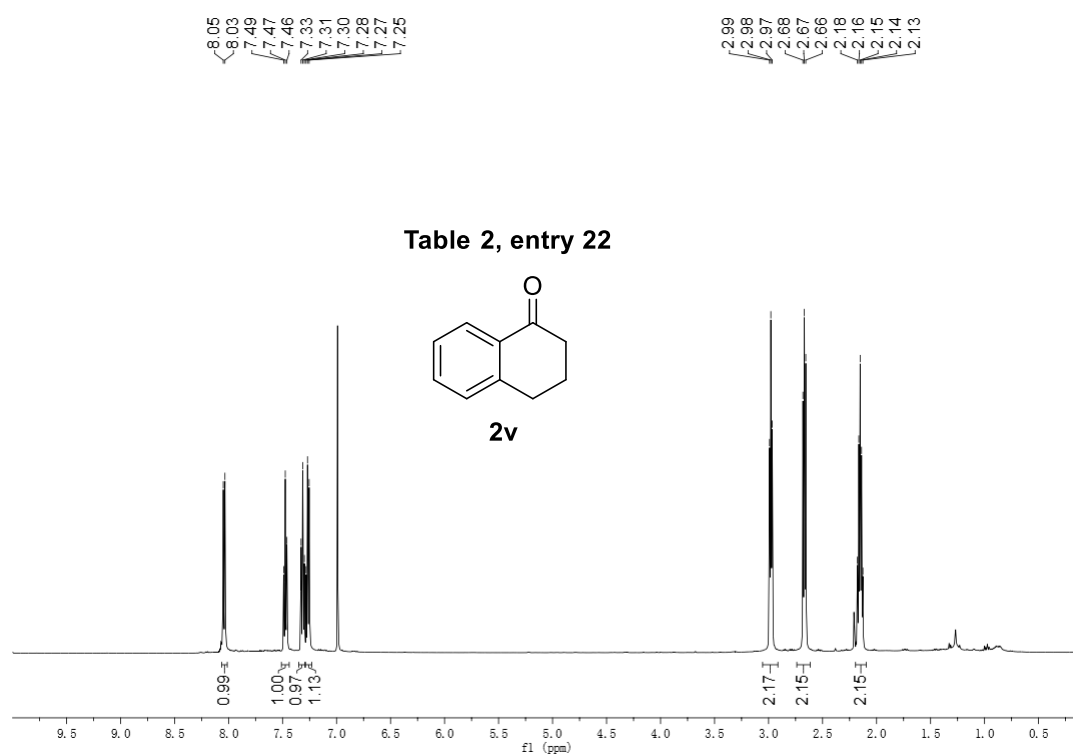

— 198.4

— 144.5

↙ 133.4

↘ 132.6

↙ 128.8

↘ 127.2

↘ 126.6

— 39.2

— 29.7

— 23.3

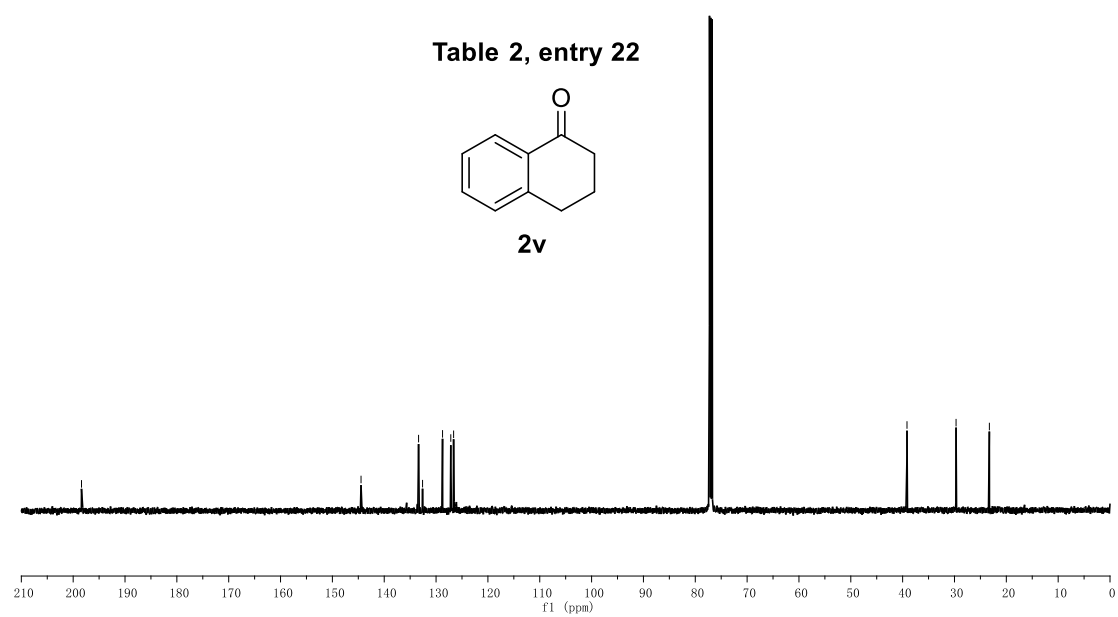

<sup>1</sup>H NMR and <sup>13</sup>C NMR Spectrum of **2w**

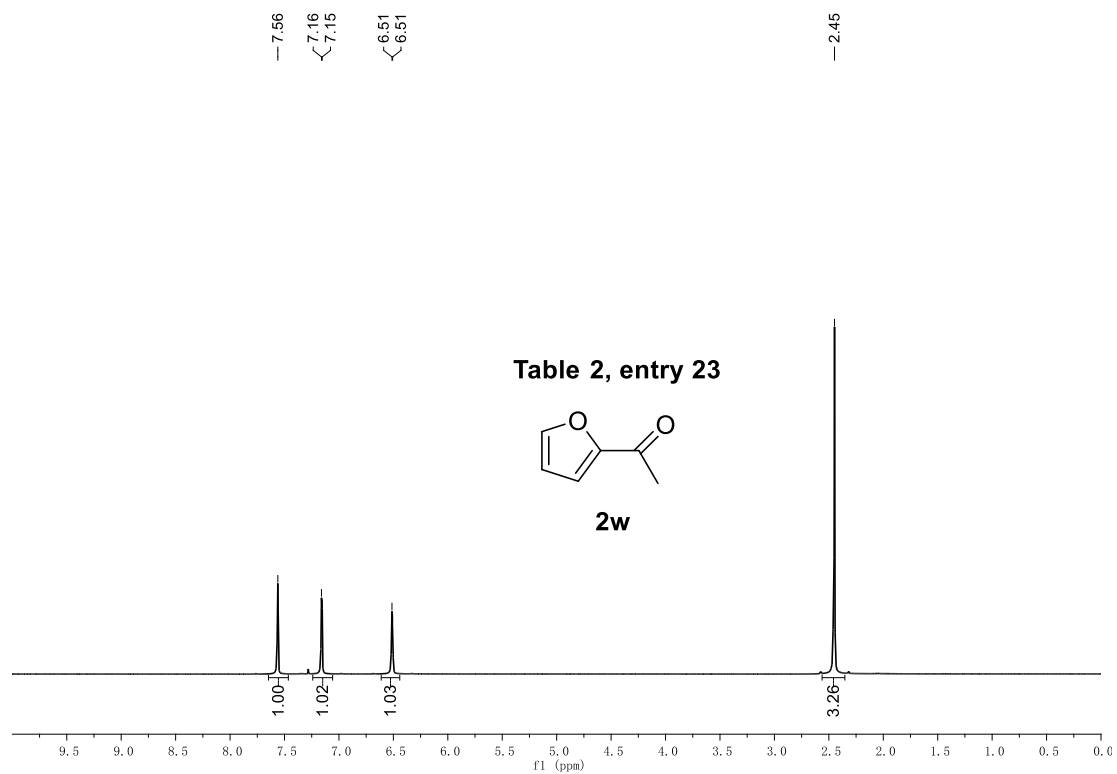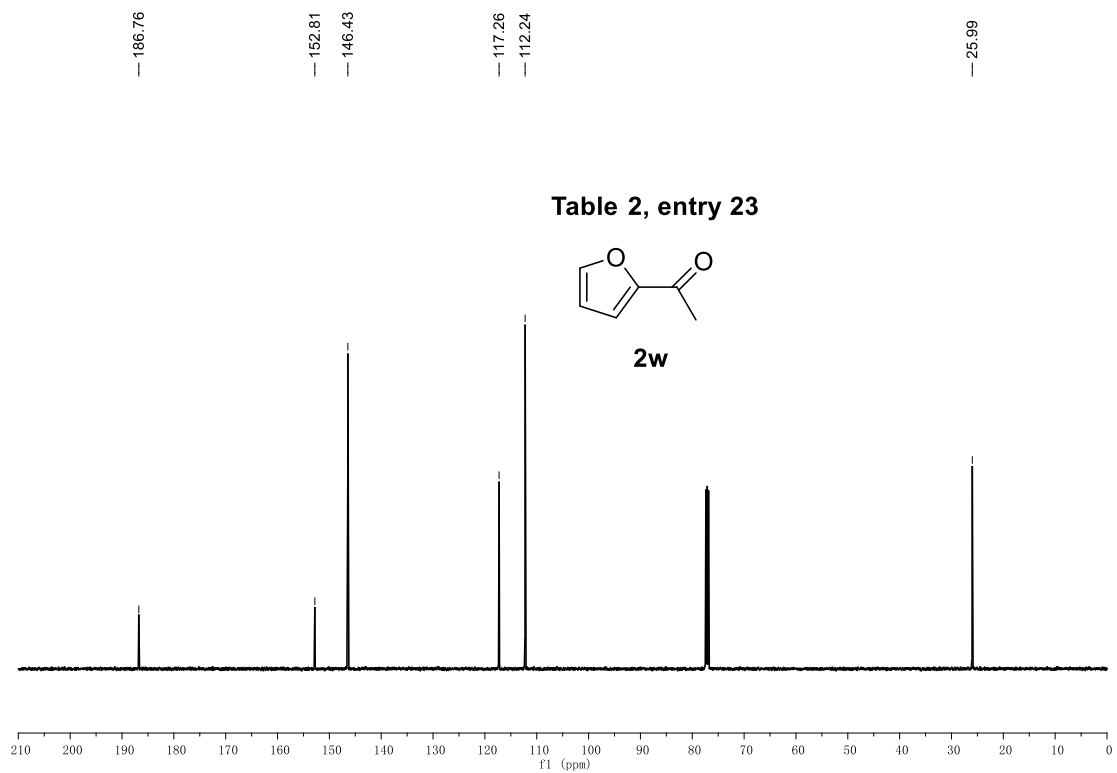

<sup>1</sup>H NMR and <sup>13</sup>C NMR Spectrum of **2x**

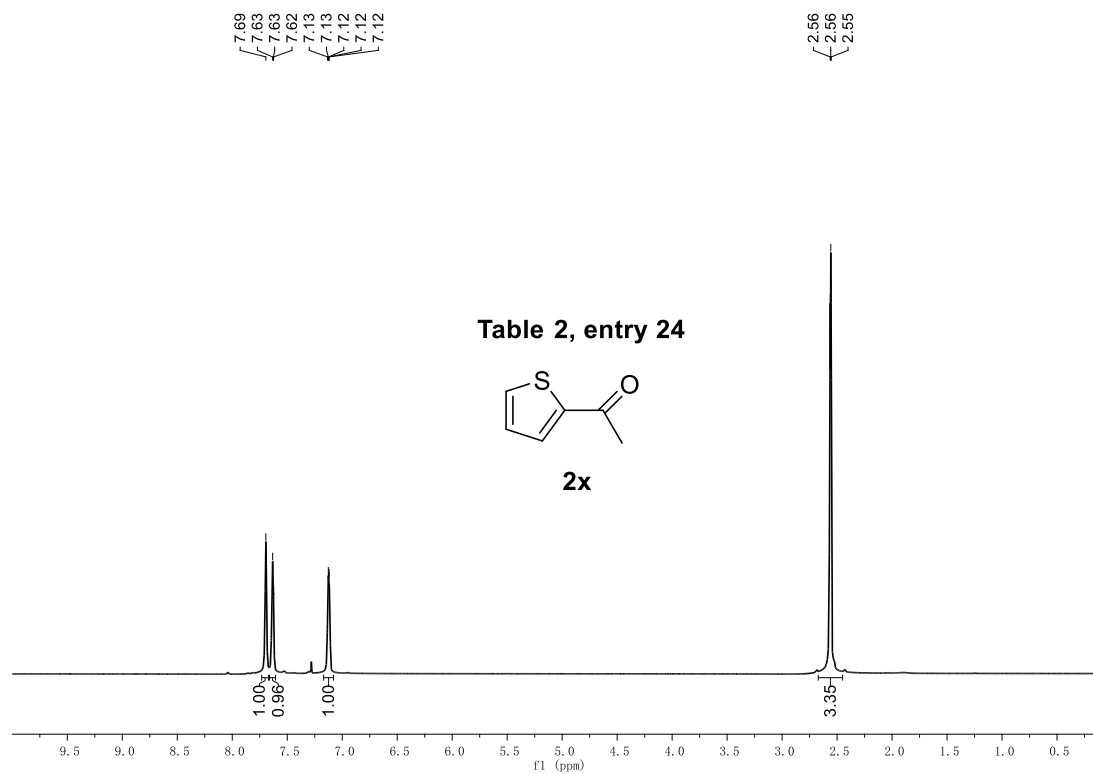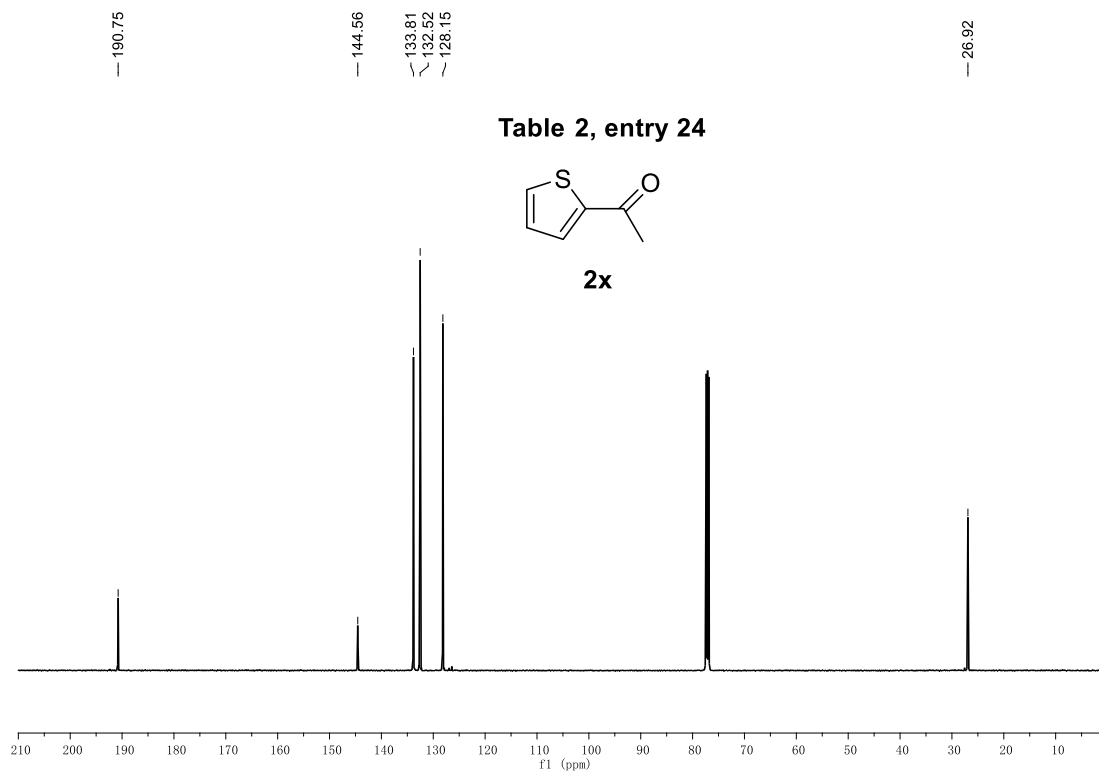



<sup>1</sup>H NMR and <sup>13</sup>C NMR Spectrum of **2y**

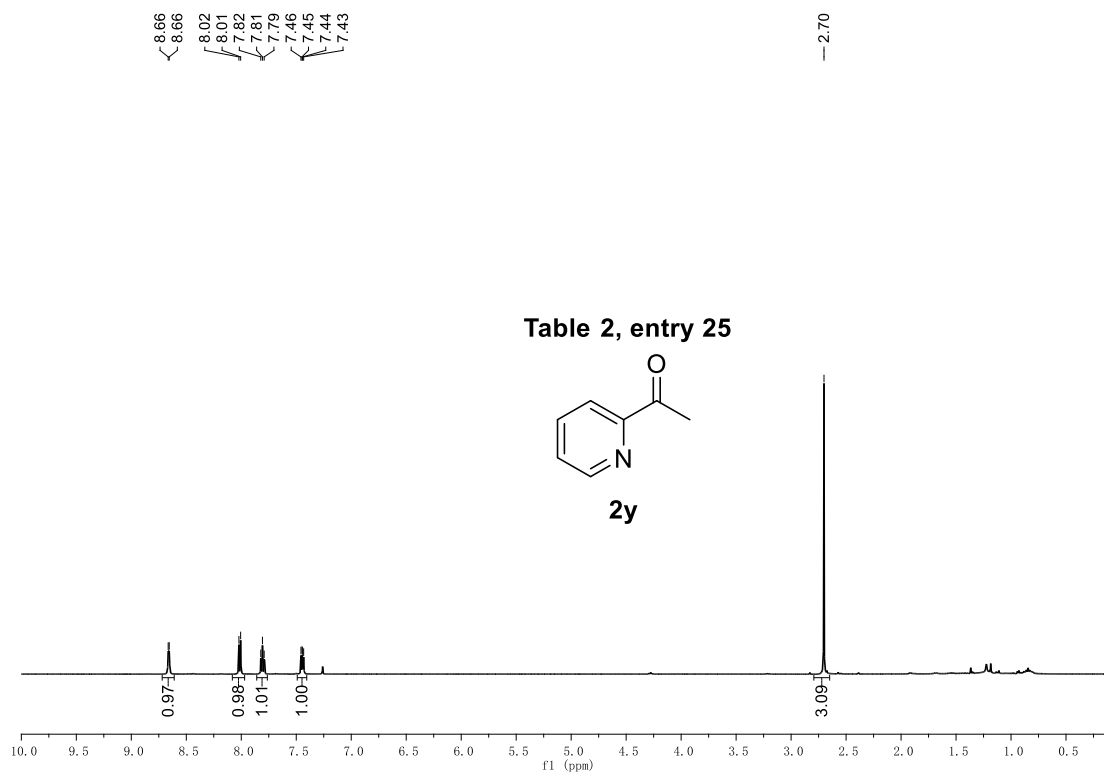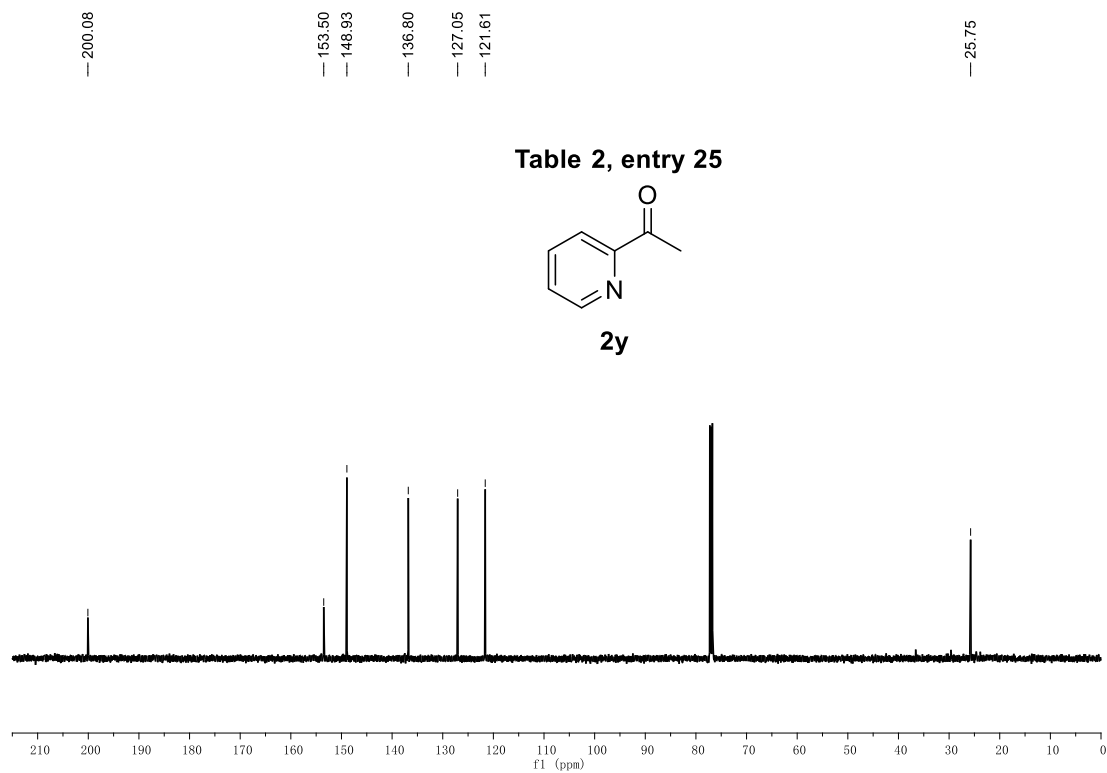

<sup>1</sup>H NMR and <sup>13</sup>C NMR Spectrum of **2ag**

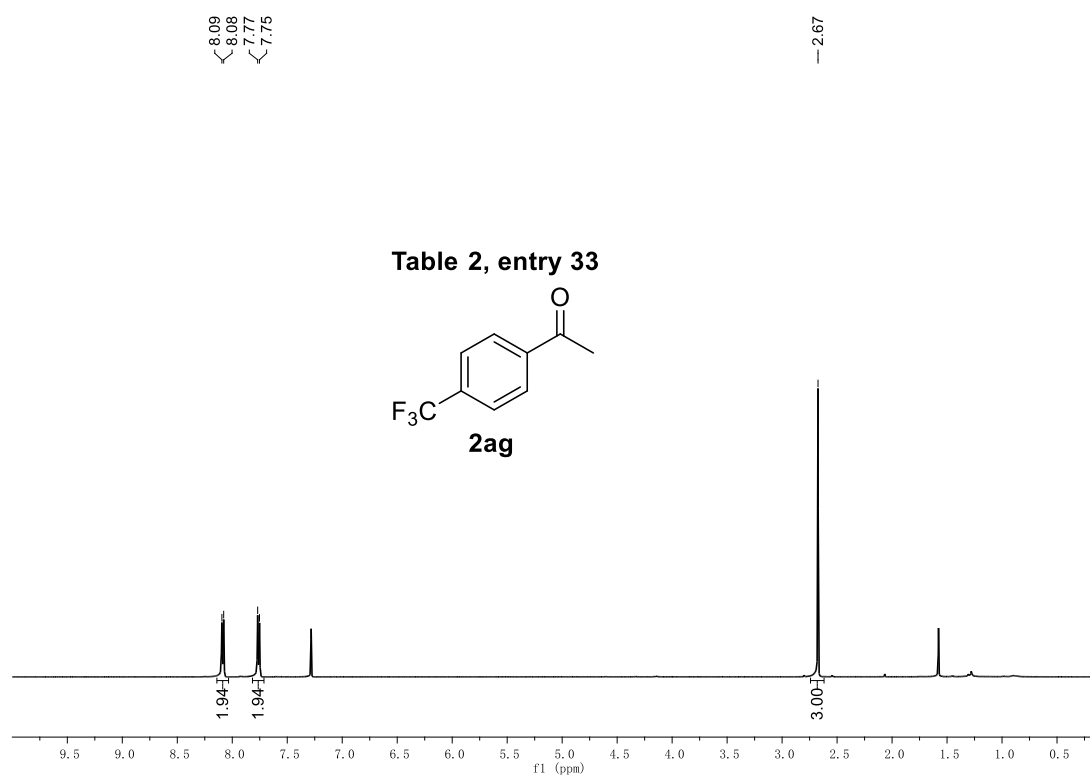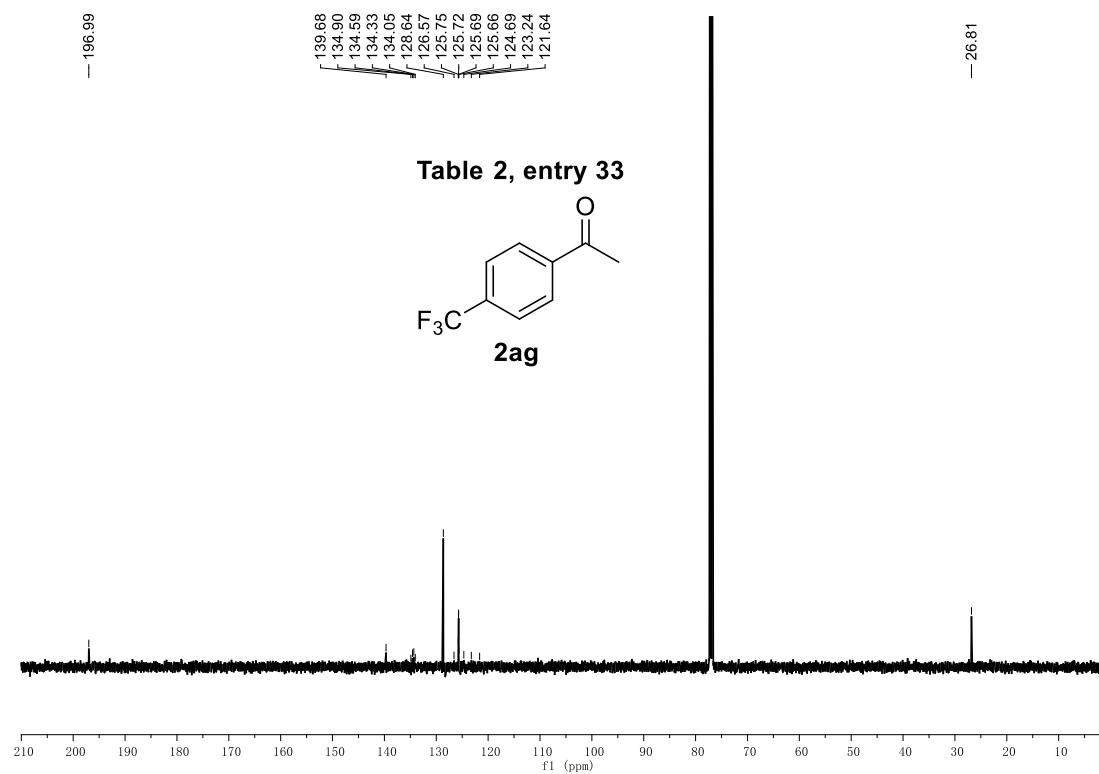

<sup>1</sup>H NMR and <sup>13</sup>C NMR Spectrum of **2ah**

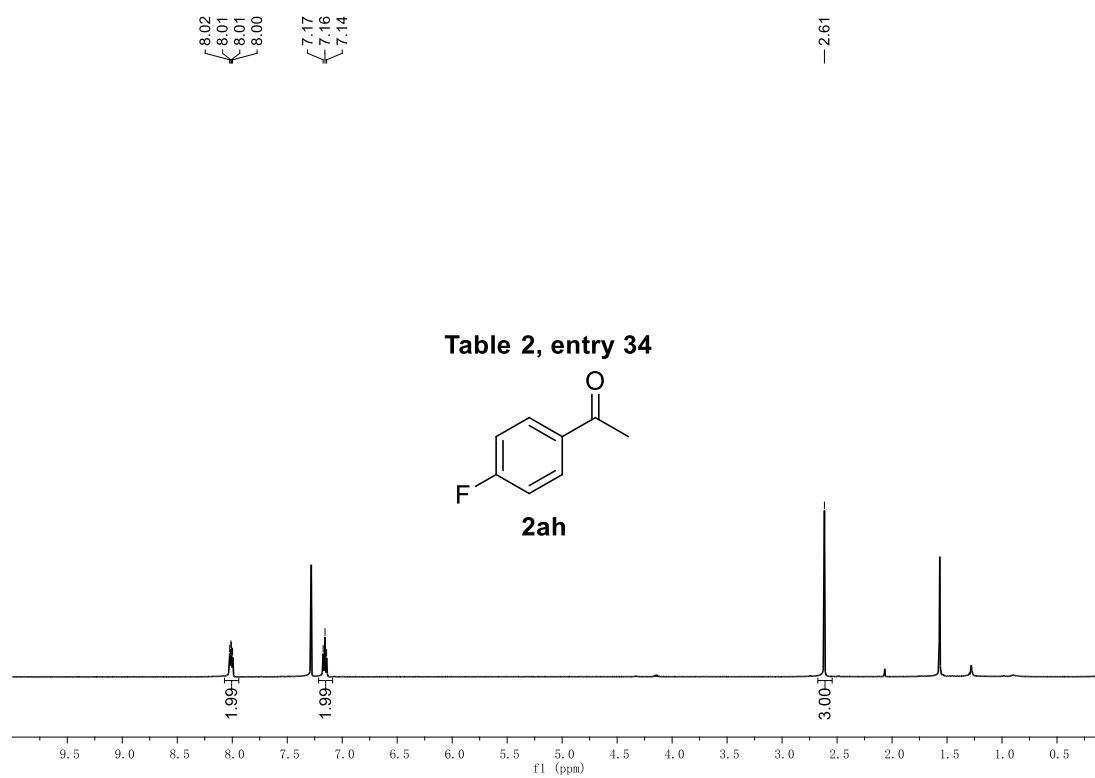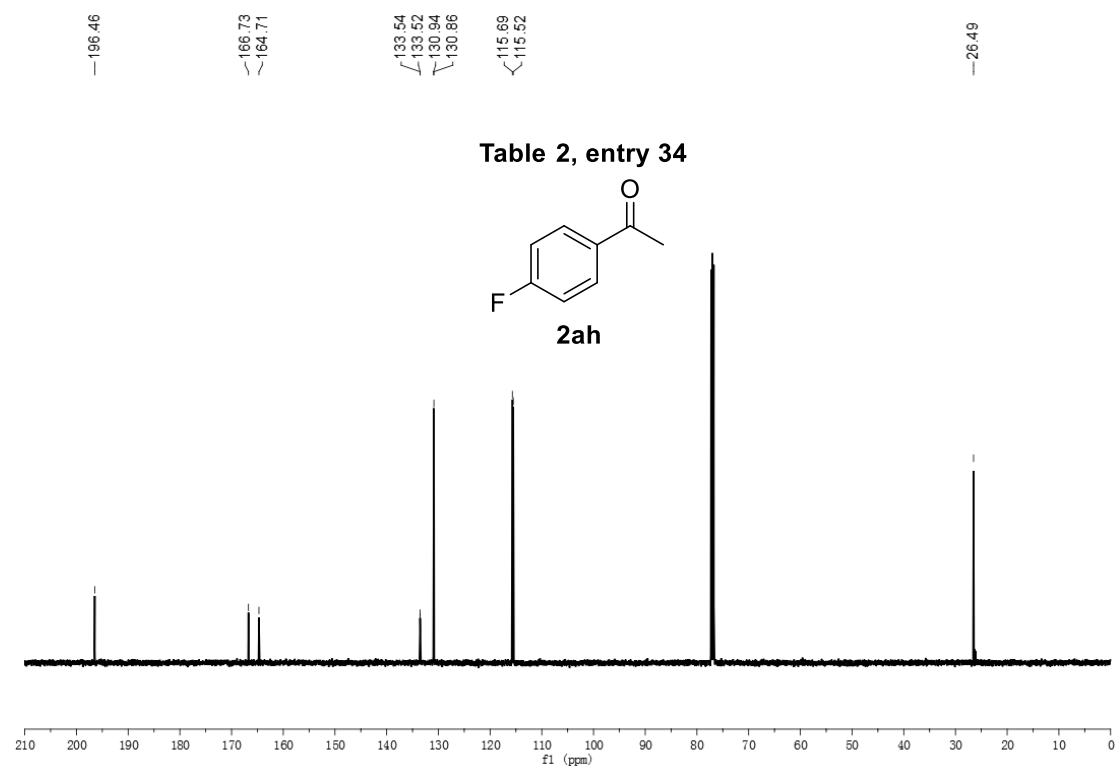

<sup>1</sup>H NMR and <sup>13</sup>C NMR Spectrum of **2ak**

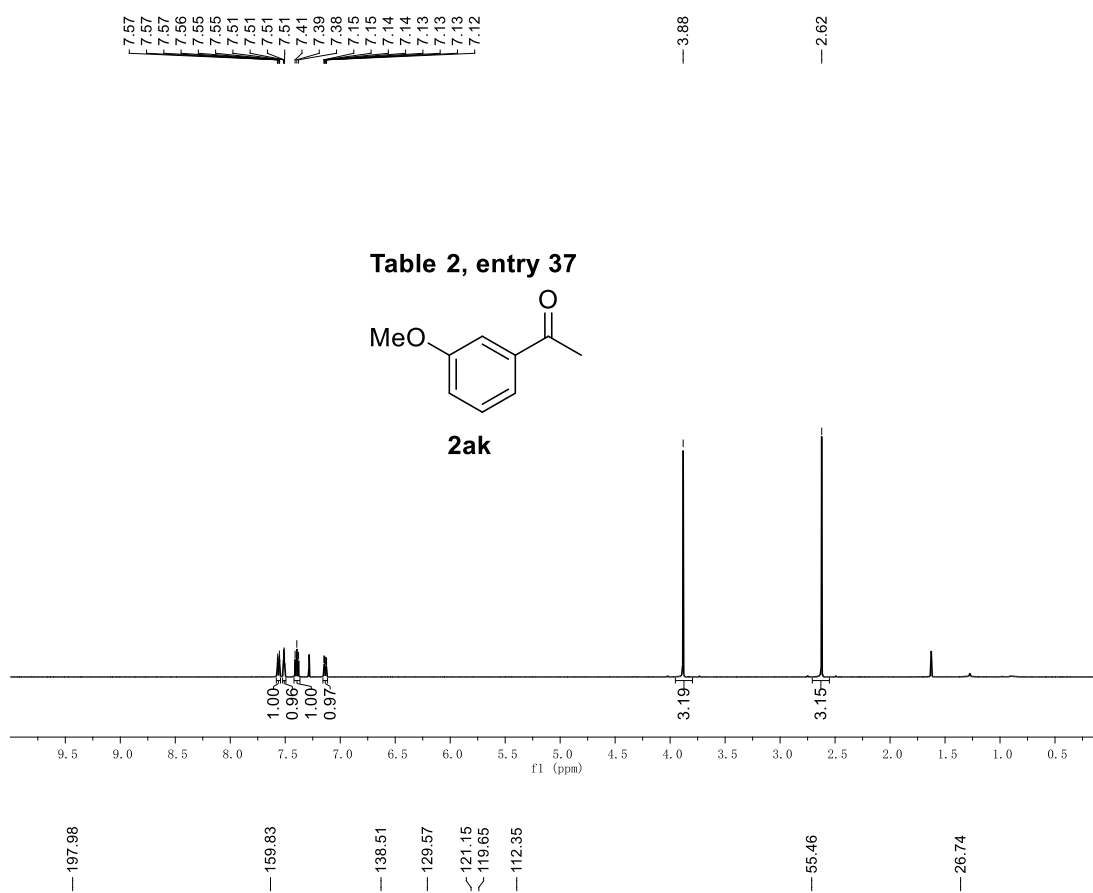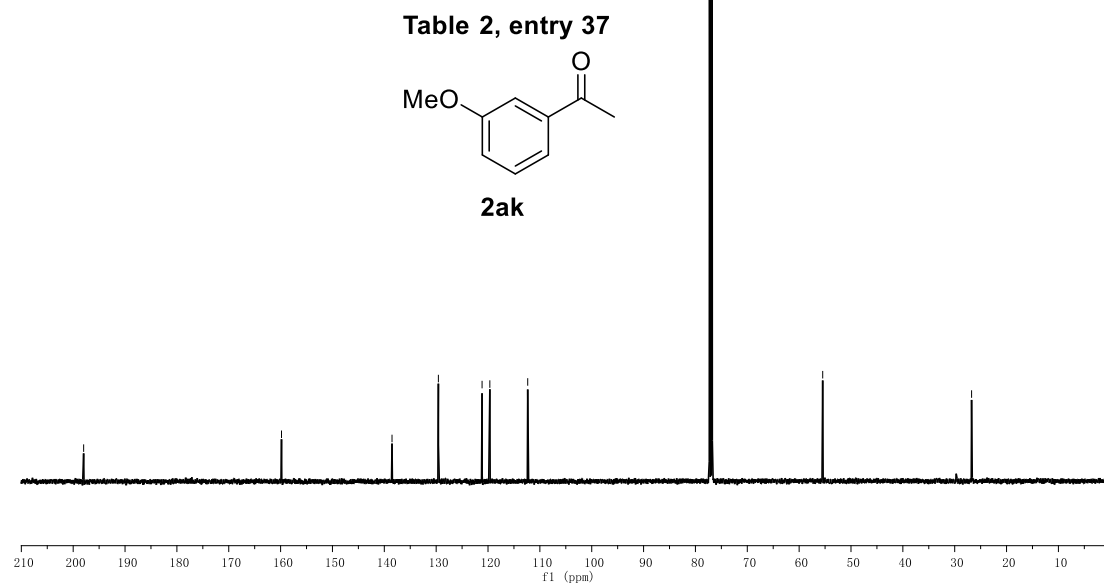

<sup>1</sup>H NMR and <sup>13</sup>C NMR Spectrum of **2al**

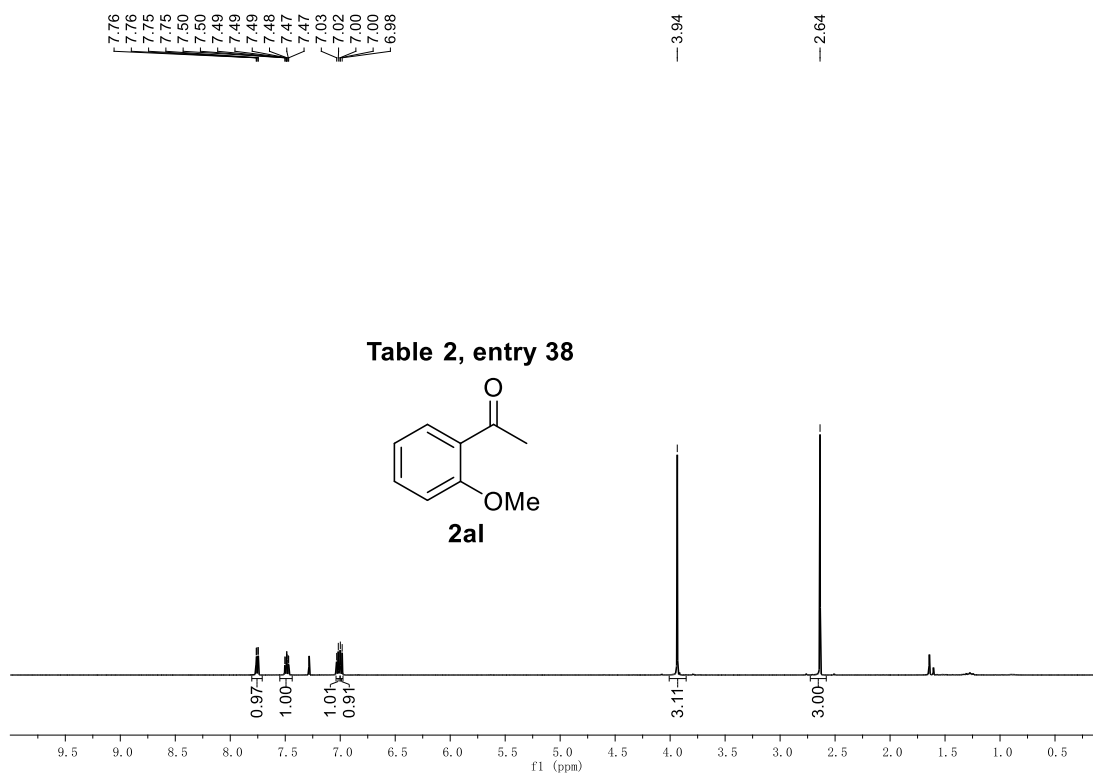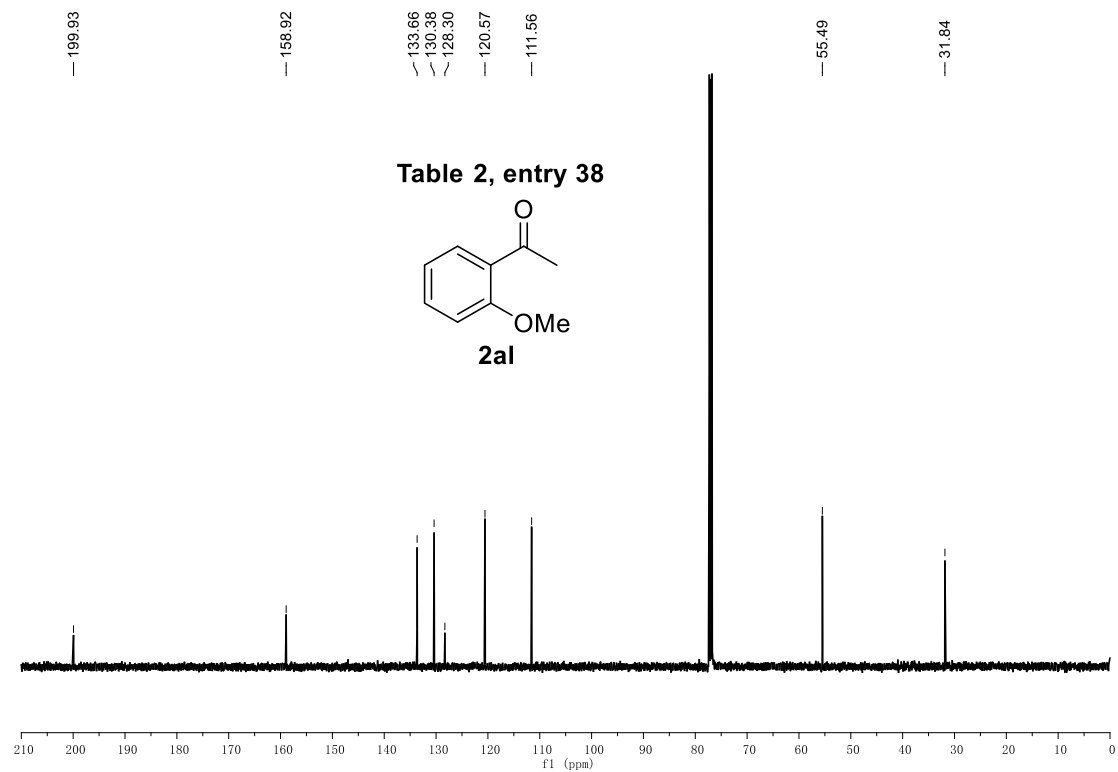

$^1\text{H}$  NMR and  $^{13}\text{C}$  NMR Spectrum of **2as**

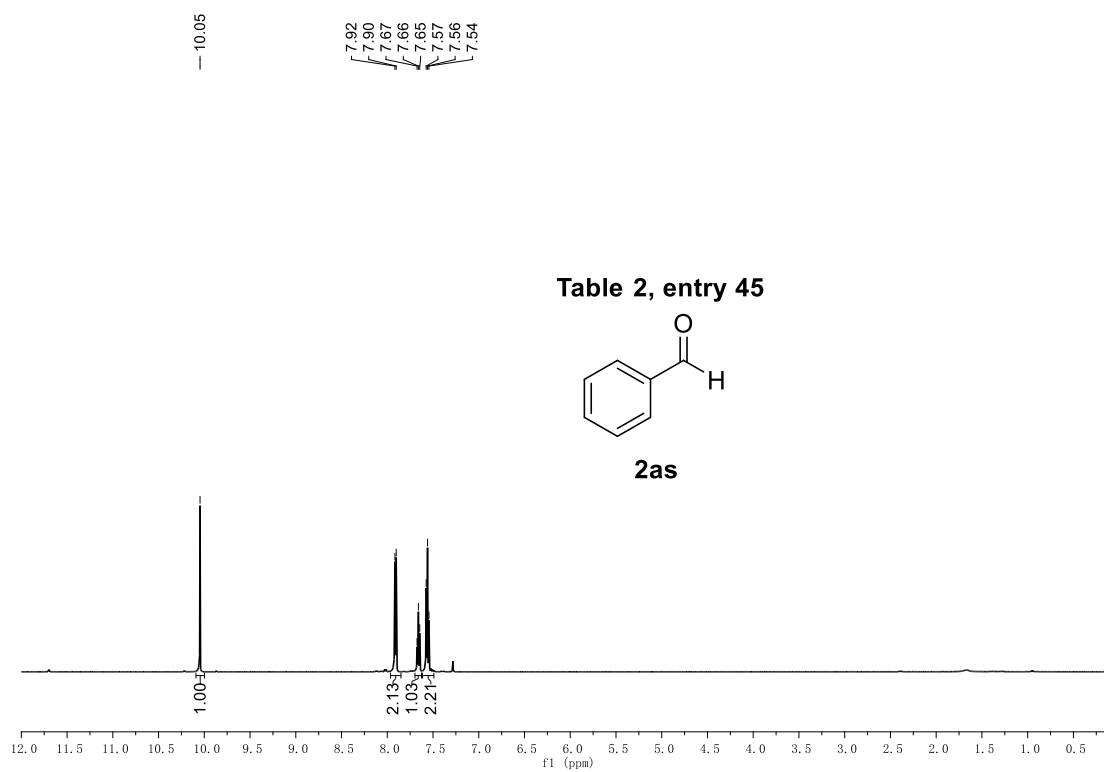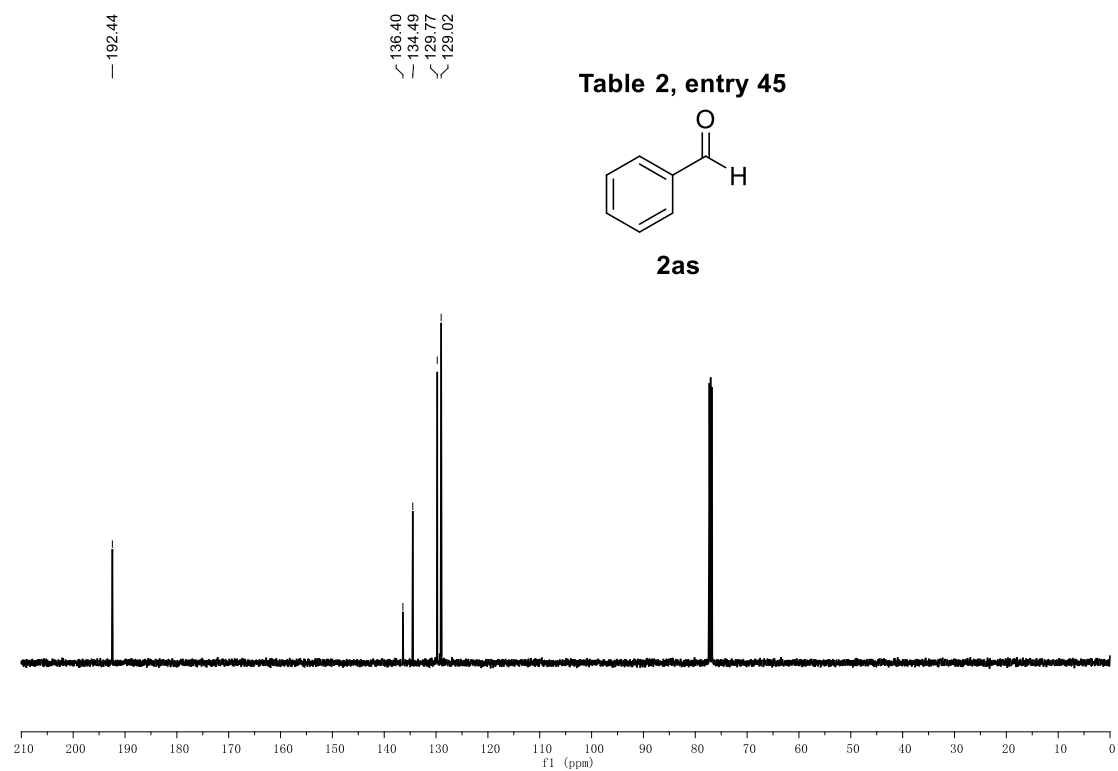

<sup>1</sup>H NMR and <sup>13</sup>C NMR Spectrum of **2at**

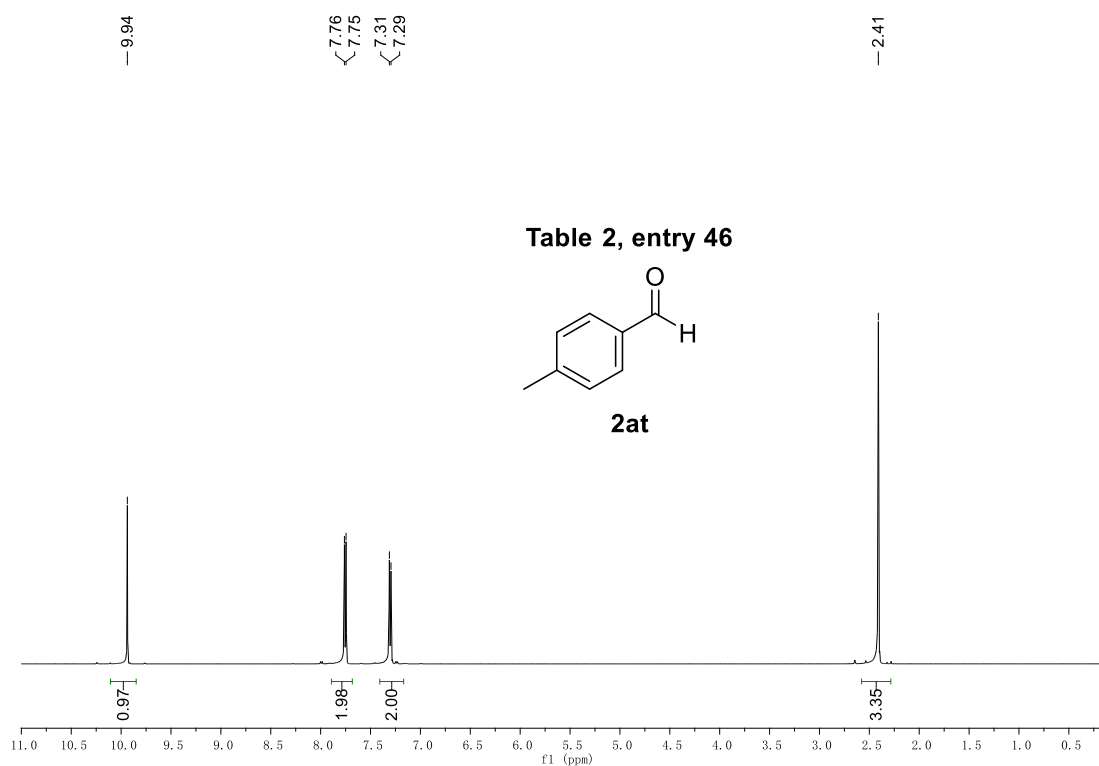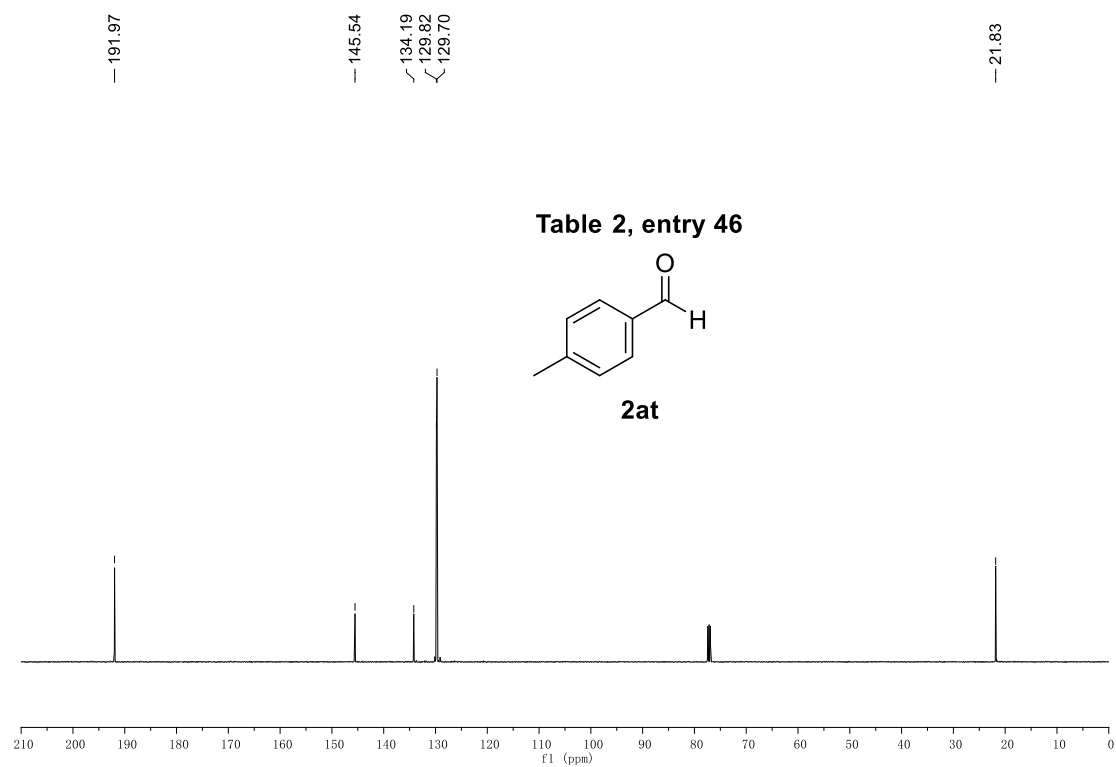

<sup>1</sup>H NMR and <sup>13</sup>C NMR Spectrum of **2au**

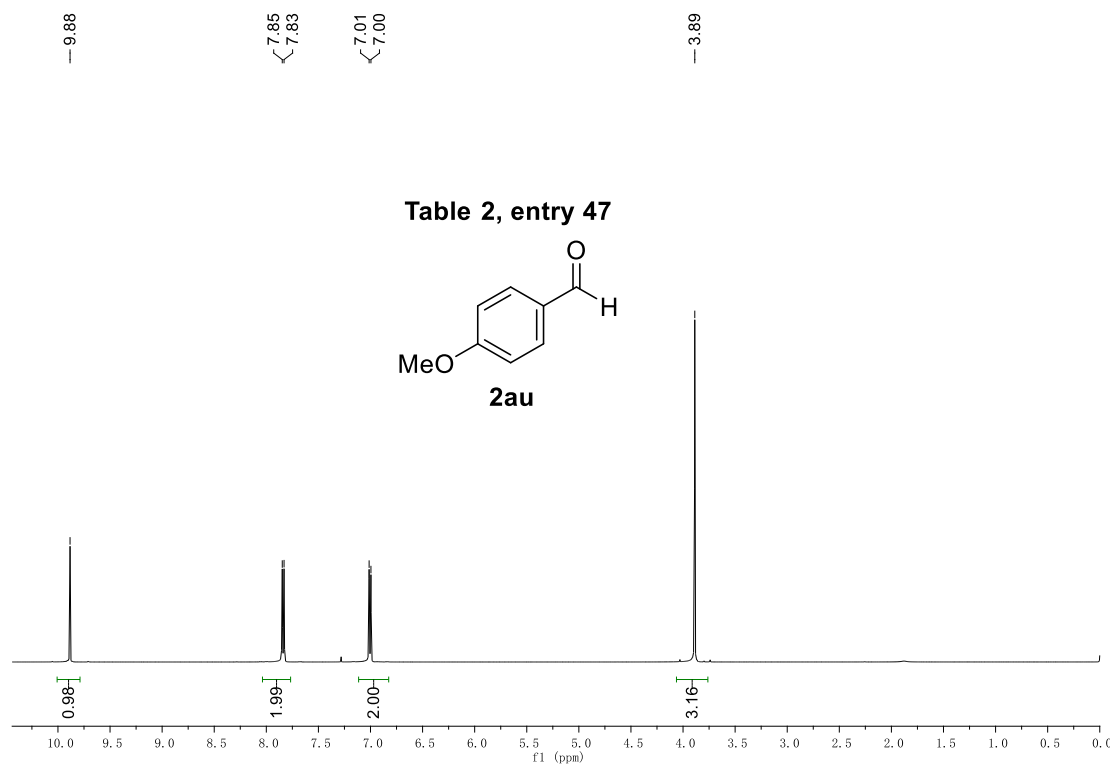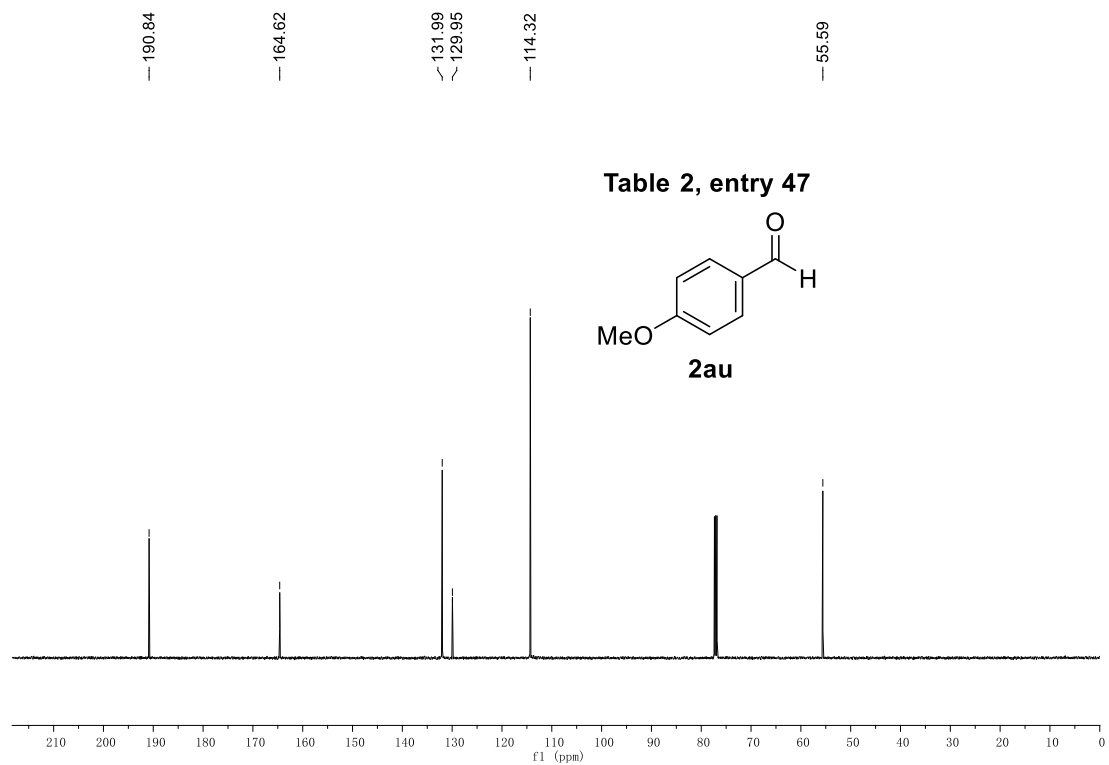



<sup>1</sup>H NMR and <sup>13</sup>C NMR Spectrum of **2av**

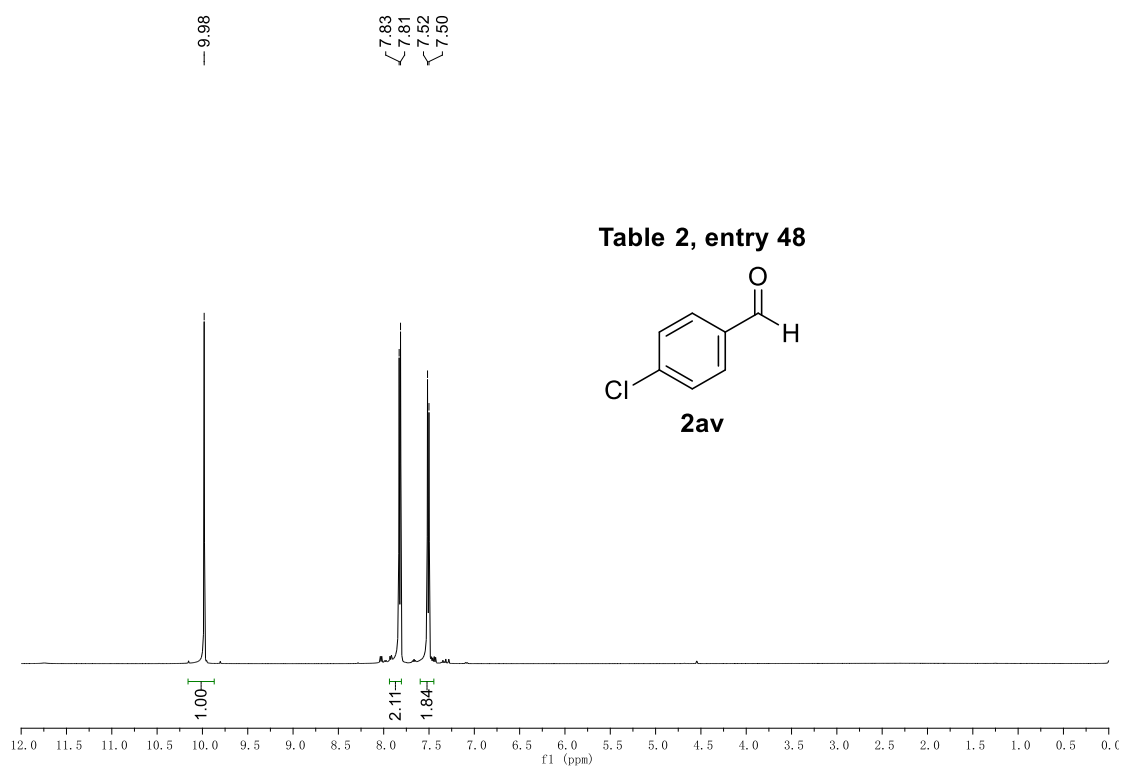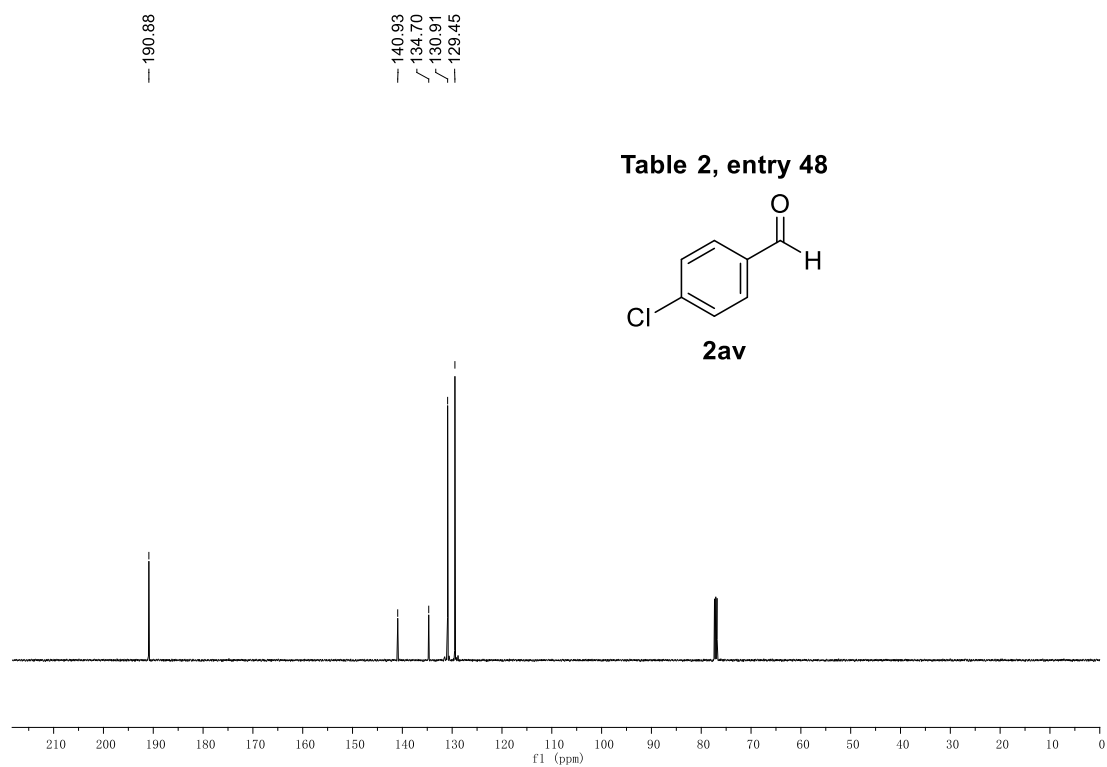

<sup>1</sup>H NMR and <sup>13</sup>C NMR Spectrum of **2aw**

9.99  
7.77  
7.75  
7.70  
7.68

Table 2, entry 49

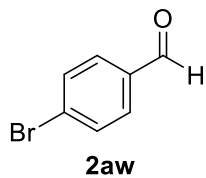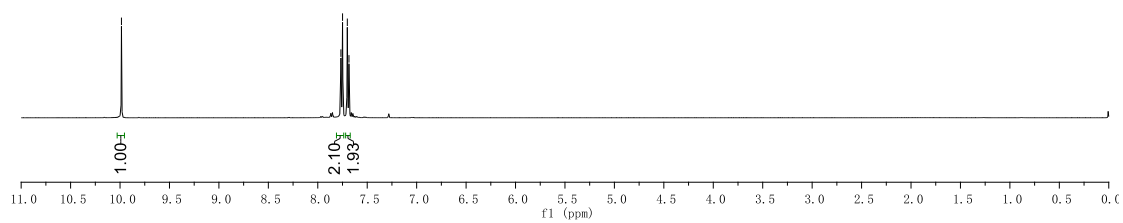

191.11  
135.07  
132.45  
130.99  
129.80

Table 2, entry 49

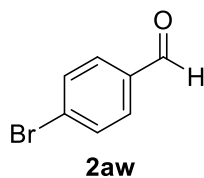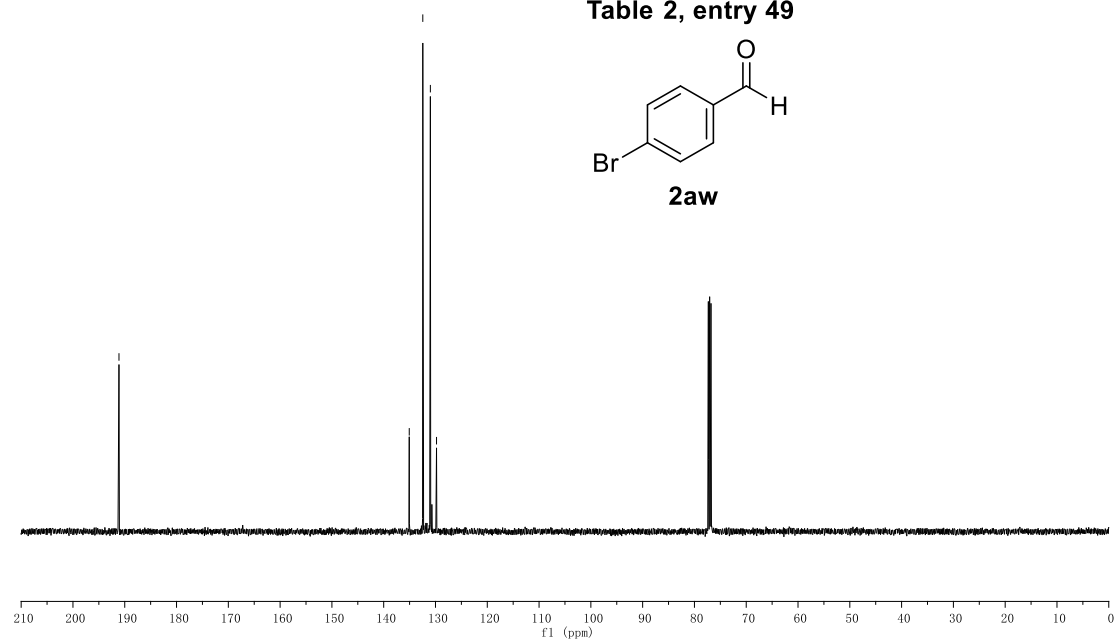

<sup>1</sup>H NMR and <sup>13</sup>C NMR Spectrum of **2ax**

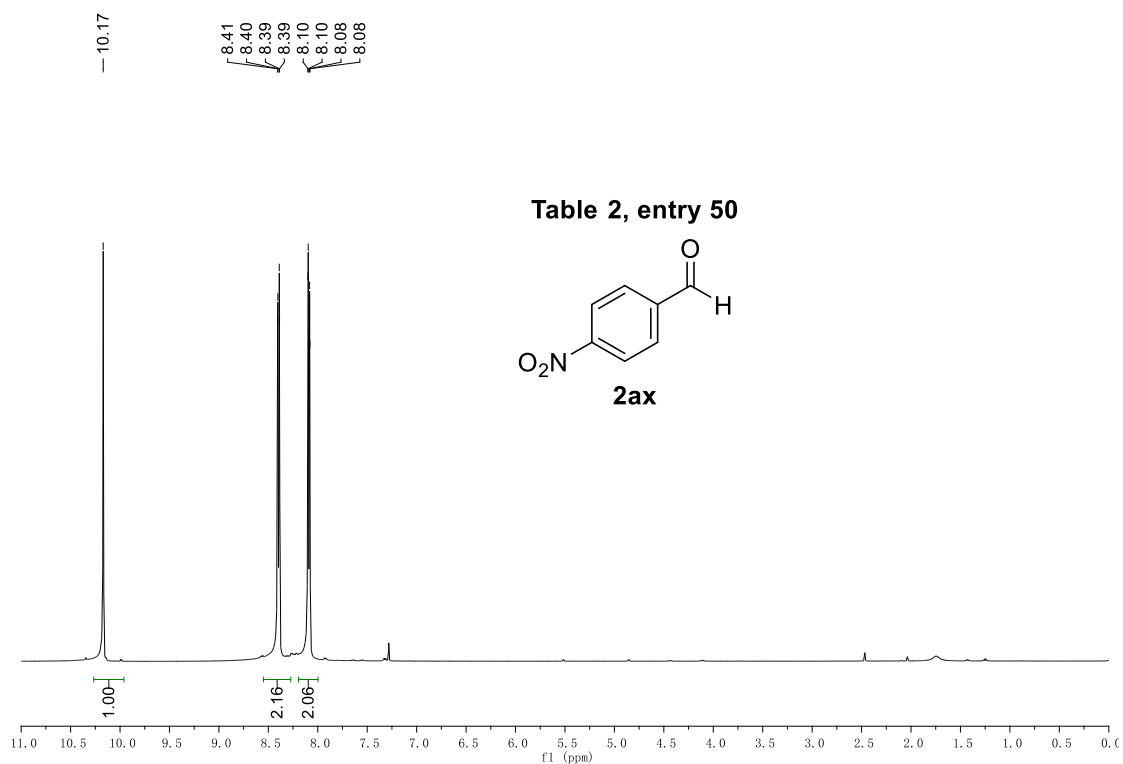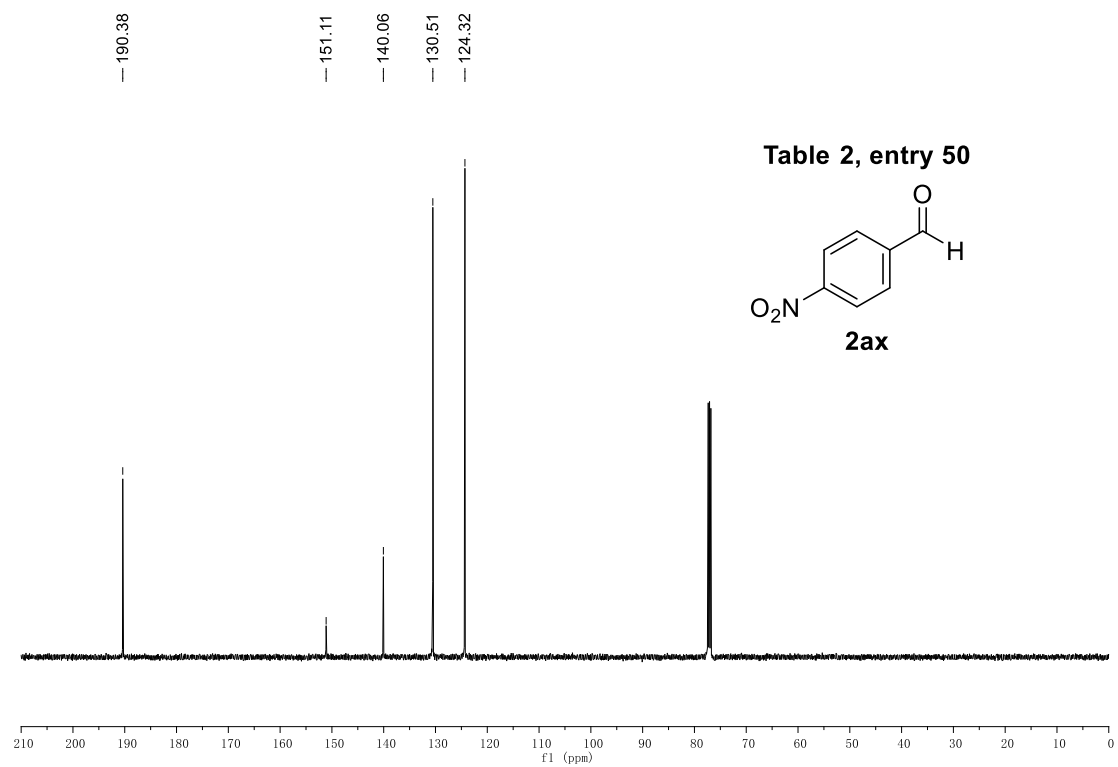

<sup>1</sup>H NMR and <sup>13</sup>C NMR Spectrum of **2ay**

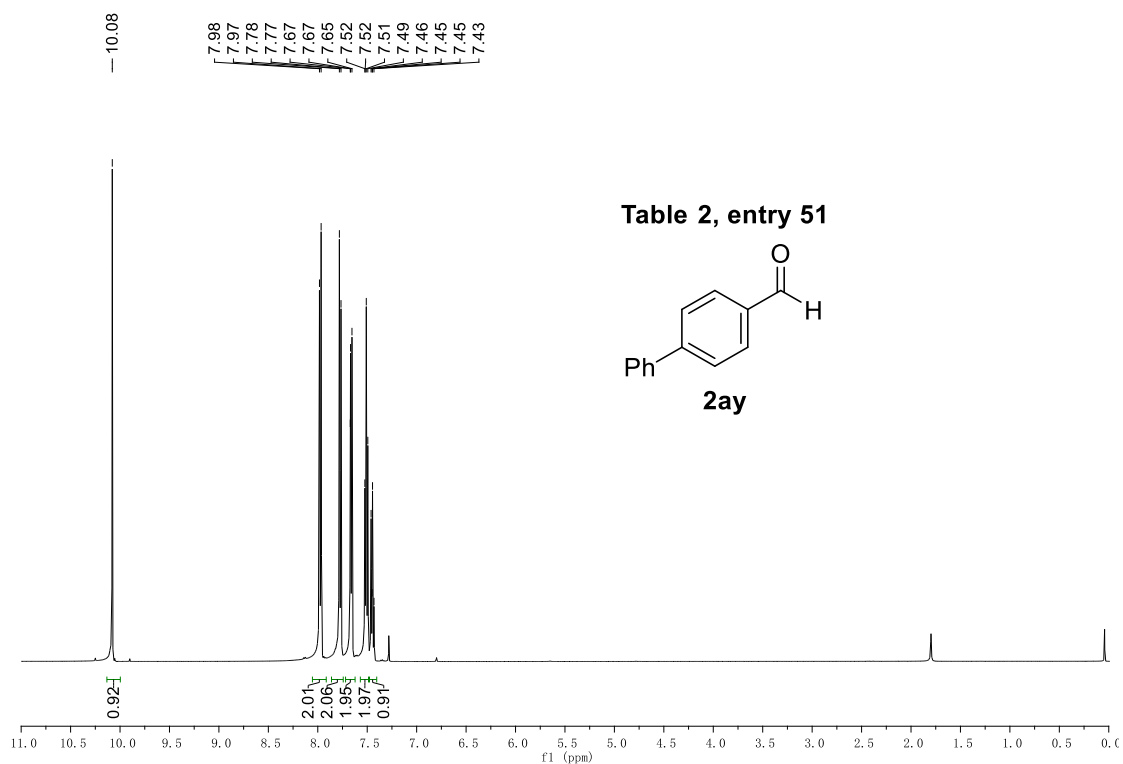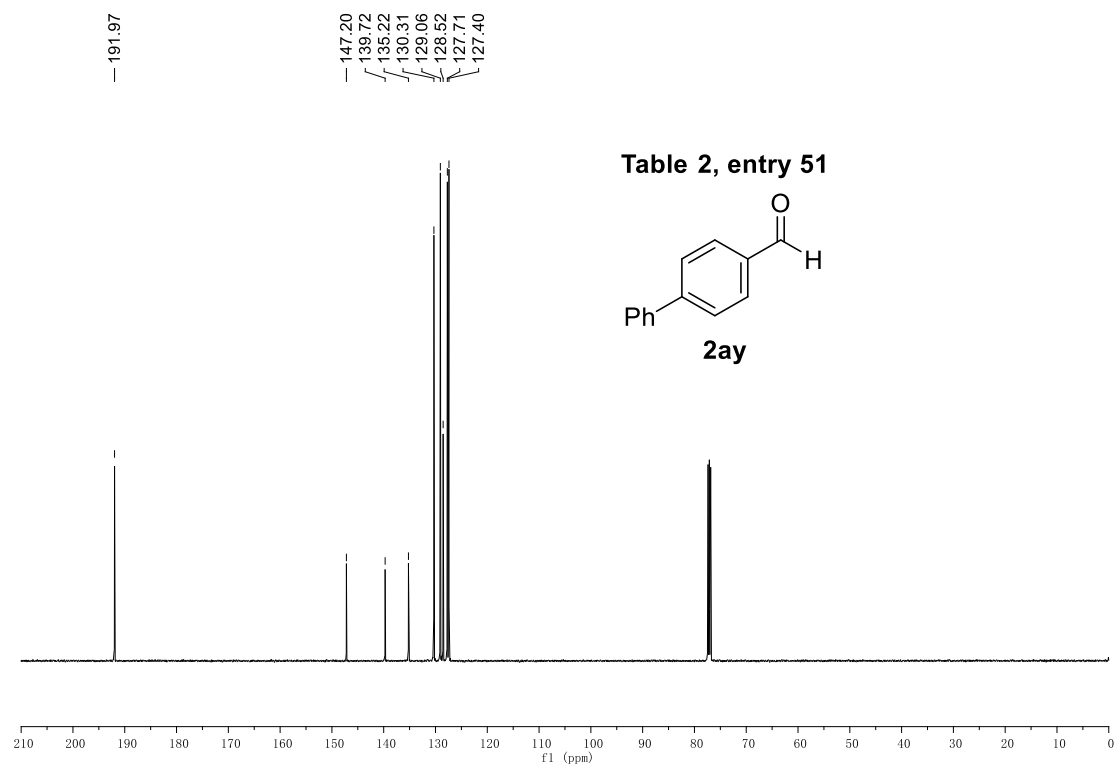

<sup>1</sup>H NMR and <sup>13</sup>C NMR Spectrum of **2az**

9.78  
9.77  
9.77

7.43  
7.41  
7.40  
7.36  
7.35  
7.33  
7.27  
7.25

3.72  
3.71

Table 2, entry 52

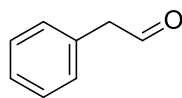

**2az**

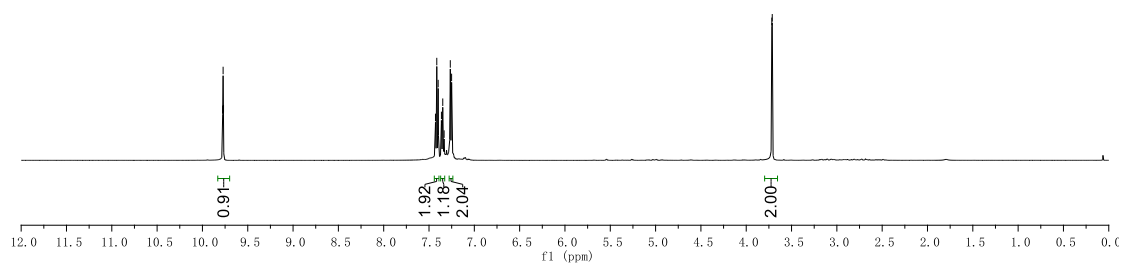

199.53

131.92  
129.68  
129.05  
127.45

50.59

Table 2, entry 52

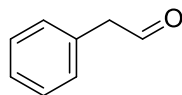

**2az**

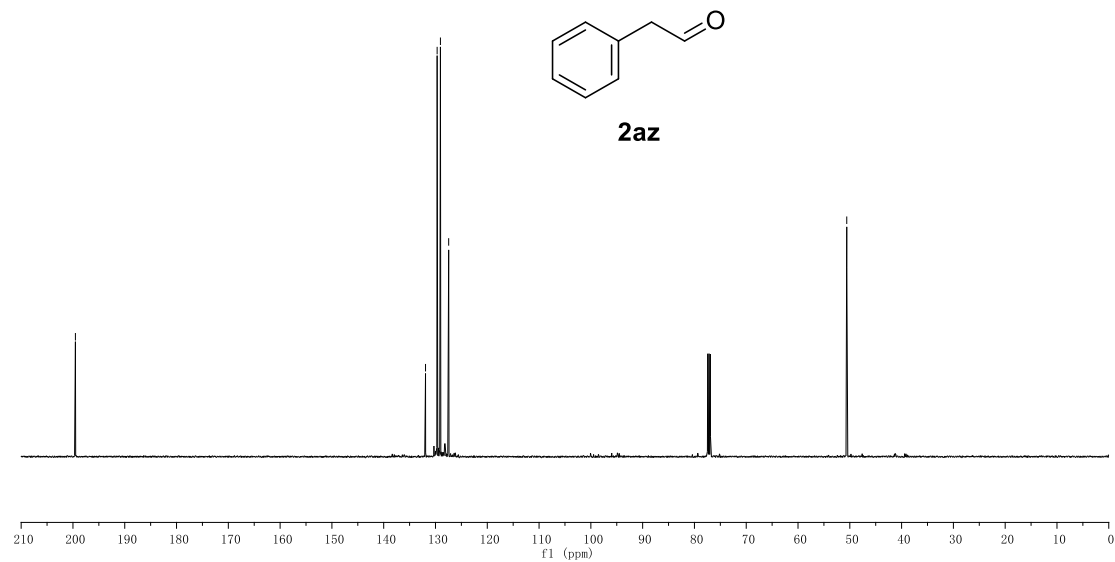

<sup>1</sup>H NMR and <sup>13</sup>C NMR Spectrum of **2aaa**

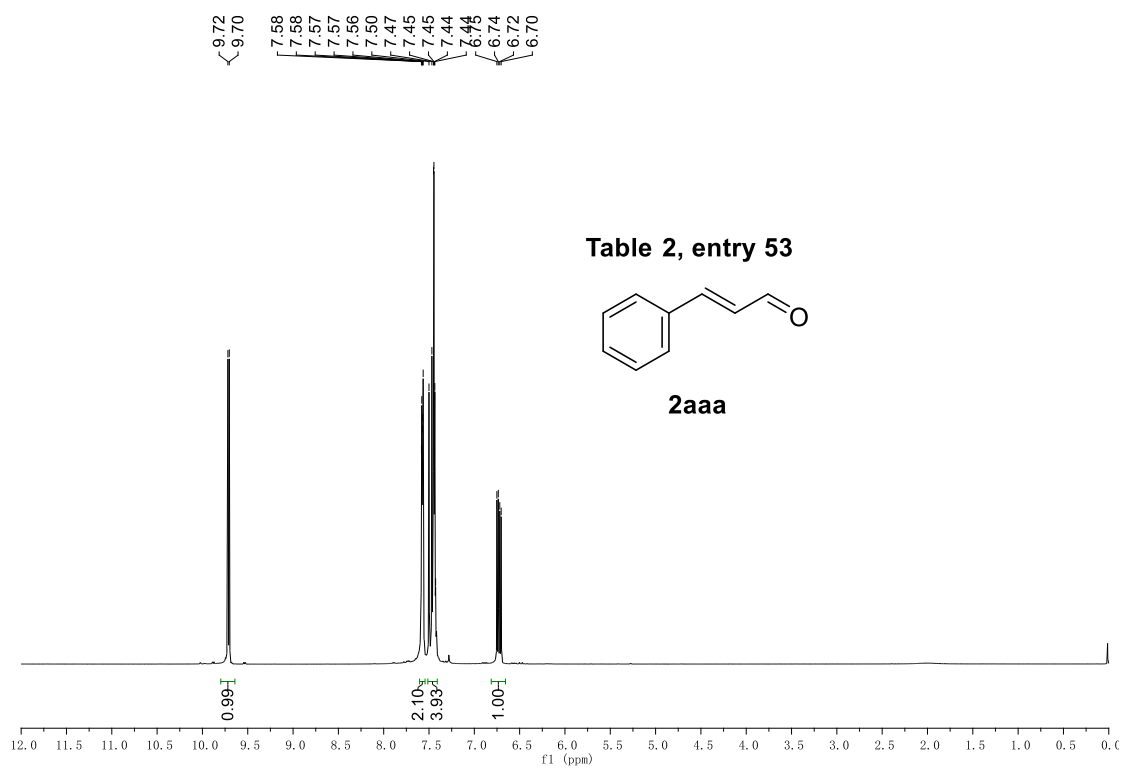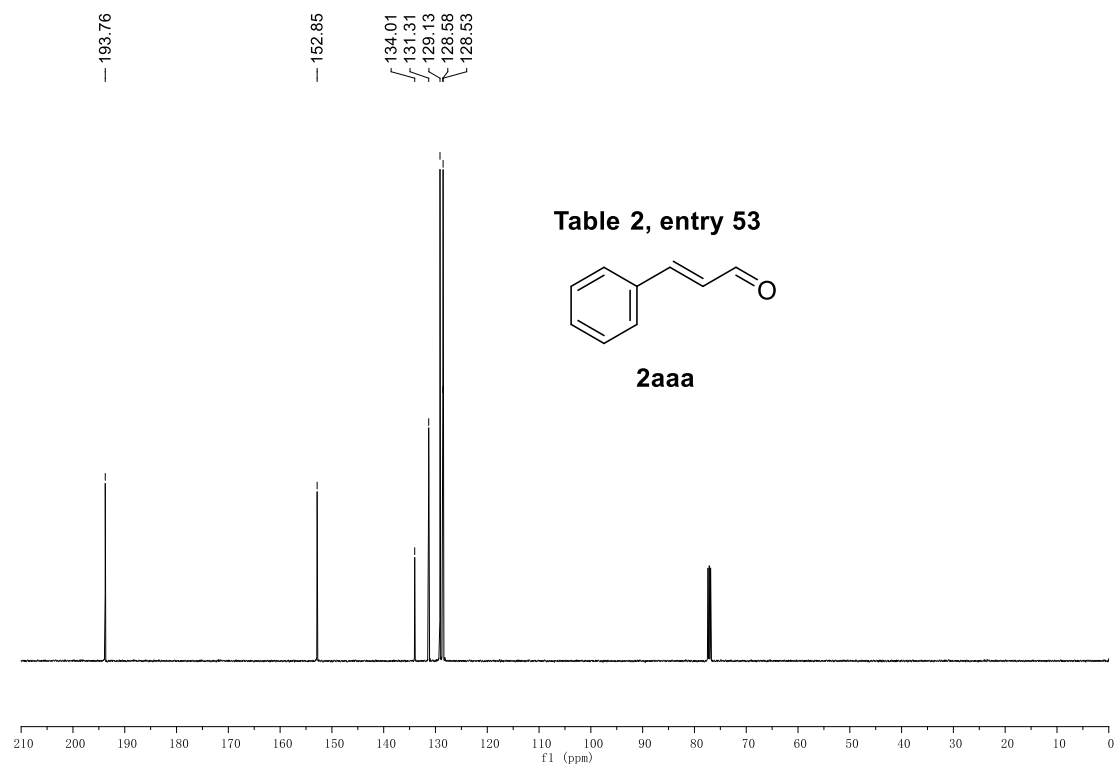

Supplement: d1cy00328c1.pdf [file d1cy00328c1.pdf]
